# Supplementary material for: 6-Aryl- and 6,7-diaryl-1,3-dimethyl-1H-perimidin-2(3H)-ones: synthesis, conformational stability, crystal structure and optical properties
Source: Royal Society of Chemistry journal article supplement (doi:10.1039/d4ob01680g), 2024-12-06
Supplement: d4ob01680g1.pdf [file d4ob01680g1.pdf]

## Supporting Information

for

### 6-Aryl- and 6,7-diaryl-1,3-dimethyl-1*H*-perimidin-2(3*H*)-ones: synthesis, conformational stability, crystal structure and optical properties

Andrey L. Dyatlov,<sup>[a]</sup> Ekaterina A. Filatova,<sup>[a]</sup> Alexander F. Pozharskii,<sup>[a]</sup> Sergey S. Marchenko,<sup>[a]</sup> Oleg P. Demidov,<sup>[b]</sup> Anatoly V. Chernyshev,<sup>[c]</sup> Anatoly V. Metelitsa,<sup>[c]</sup> Sergei S. Brig,<sup>[d,e]</sup> Michael G. Medvedev,<sup>[e]</sup> Danis R. Bekmansurov,<sup>[c]</sup> Pavel G. Morozov,<sup>[a]</sup> Anna V. Gulevskaya\*<sup>[a]</sup>

<sup>[a]</sup> Department of Chemistry, Southern Federal University, Zorge str. 7, 344090 Rostov-on-Don Russian Federation. E-mail: [agulevskaya@sfedu.ru](mailto:agulevskaya@sfedu.ru)

<sup>[b]</sup> Department of Chemistry and Pharmacy, North Caucasus Federal University, Pushkin str. 1a, 355017 Stavropol, Russian Federation

<sup>[c]</sup> Institute of Physical and Organic Chemistry, Southern Federal University, 194/2 Stachka ave., Rostov-on-Don 344090, Russian Federation

<sup>[d]</sup> Lomonosov Moscow State University, Leninskie Gory 1/3, 119991 Moscow, Russian Federation

<sup>[e]</sup> N.D. Zelinsky Institute of Organic Chemistry, Russian Academy of Sciences, 119991, Leninsky Prosp., 47, Moscow, Russian Federation

### Experimental details, copies of NMR, UV-vis and fluorescence spectra, calculations of experimental and theoretical barriers of *syn/anti* isomerization

#### Table of Contents

|                                                                                                                                                            |     |
|------------------------------------------------------------------------------------------------------------------------------------------------------------|-----|
| Experimental Section.....                                                                                                                                  | S1  |
| Copies of <sup>1</sup> H and <sup>13</sup> C NMR Spectra (Figures S1–S53).....                                                                             | S8  |
| Copies of UV-vis and Fluorescence Spectra (Figures S54–S63) .....                                                                                          | S35 |
| Calculations of experimental <i>syn/anti</i> -isomerization barrier of compounds <b>3b</b> and <b>3f</b><br>(Tables S1, S2).....                           | S40 |
| Dynamic NMR simulation data (Figure 64, Tables S3, S4).....                                                                                                | S44 |
| Quantum-chemical calculations of the <i>syn/anti</i> -isomerization barrier of compounds <b>3</b> ,<br>atom coordinates, total energies (Table S5-S9)..... | S46 |
| References .....                                                                                                                                           | S61 |

## EXPERIMENTAL SECTION

**General Information:**  $^1\text{H}$  and  $^{13}\text{C}$  NMR spectra were recorded on 250 and 600 MHz spectrometers. Chemical shifts are reported in ppm relative to  $\text{Me}_4\text{Si}$ . The electronic absorption spectra of the studied compounds have been recorded on an Agilent 8453 spectrophotometer equipped with a temperature-controlled cell holder at 293 K. Fluorescence emission spectra have been collected using an Eclipse Varian spectrofluorimeter. Mass spectra were performed in electrospray ionization (ESI) modes (HR-ESI MS). Melting points were determined in glass capillaries and are uncorrected. Flash column chromatography was performed on  $\text{Al}_2\text{O}_3$  and  $\text{SiO}_2$ . Starting 1,3-Dimethyl-1*H*-perimidin-2(3*H*)-one,<sup>[1]</sup> and 6-bromo-1,3-dimethyl-1*H*-perimidin-2(3*H*)-one **5**<sup>[2]</sup> were synthesized as it was described earlier.

**Crystal Structure Determination:** X-ray measurements were conducted with diffractometer SyperNova, Dual, Cu at home/near, AtlasS2'. Atomic coordinates, bond lengths, bond angles and thermal parameters have been deposited at the Cambridge Crystallographic Data Centre (CCDC): CCDC 2391756 (**3a**), CCDC 2391755 (**3c**), CCDC 2391757 (**3g**), CCDC 2391758 (**3h**). These data can be obtained free of charge from Cambridge Crystallographic Data Centre.

**Synthesis of 6,7-dibromo-1,3-dimethyl-1*H*-perimidin-2(3*H*)-one (7).** To a solution of 1,3-dimethyl-1*H*-perimidin-2(3*H*)-one (1.27 g, 6 mmol) in DMF (15 mL) a solution of NBS (2.14 g, 12 mmol) in DMF (12 mL) was added over 2.5 h at room temperature. The reaction mixture was stirred for 24 h. The resulting light-yellow precipitate was filtered off, washed with water and dried in air. Recrystallization from acetonitrile gave compound **3** (1.96 g, 88%) as a colorless solid with mp 195-196 °C (lit. 202-203 °C [2]).

### Synthesis of 6-aryl-1,3-dimethyl-1*H*-perimidin-2(3*H*)-ones **6** (Table 1).

*Method A.* A mixture of 6-bromo-1,3-dimethyl-1*H*-perimidin-2(3*H*)-one **5** (175 mg, 0.6 mmol), 5% Pd/C (64 mg, 0.03 mmol),  $\text{PPh}_3$  (31 mg, 0.12 mmol), phenylboronic acid (80 mg, 0.66 mmol) and 2M  $\text{K}_2\text{CO}_3$  (3 mL) in toluene (4 mL) was stirred at 95 °C for 24 h under argon. The reaction mixture was then diluted with water (10 mL) and extracted with  $\text{CH}_2\text{Cl}_2$  ( $3 \times 10$  mL). The extract was dried over  $\text{Na}_2\text{SO}_4$  and evaporated to dryness. The residue was purified by flash column chromatography on  $\text{Al}_2\text{O}_3$  ( $2 \times 20$  cm), using  $\text{CH}_2\text{Cl}_2$  as an eluent. The fraction with  $R_f$  0.8 gave compound **6a** (130 mg, 75%).

Compounds **6a-e** were synthesized similarly using the corresponding arylboronic acid.

*Method B* (general procedure). A mixture of 6-bromo-1,3-dimethyl-1*H*-perimidin-2(3*H*)-one **5** (175 mg, 0.6 mmol),  $\text{Pd}(\text{PPh}_3)_4$  (35 mg, 0.03 mmol), arylboronic acid (0.66 mmol), 2M  $\text{K}_2\text{CO}_3$  (3 mL) in toluene (4 mL) was refluxed for 24-48 h under argon. The reaction mixture was then diluted with water (10 mL) and extracted with  $\text{CH}_2\text{Cl}_2$  ( $3 \times 10$  mL). The extract was dried over  $\text{Na}_2\text{SO}_4$  and evaporated to dryness. In cases of compounds **6b-e**, the residue was purified by flash column chromatography on  $\text{Al}_2\text{O}_3$  ( $2 \times 20$  cm), using  $\text{CH}_2\text{Cl}_2$  as an eluent. The fraction with  $R_f$  0.8 gave compound **6**. In cases of compounds **6f,i,j**, the chromatography was carried out on silica ( $2 \times 20$  cm), using  $\text{CH}_2\text{Cl}_2$  as an eluent. The fraction with  $R_f$  0.2-0.4 gave compound **6**. In cases of compounds **6g,h**, the flash column chromatography on silica ( $2 \times 20$  cm) with  $\text{CH}_2\text{Cl}_2$  as an eluent allowed to separate starting compound **5** ( $R_f$  0.4). Elution was then continued using a mixture of  $\text{CH}_2\text{Cl}_2$ -EtOAc (10:1, v:v) as the eluent. The fraction with  $R_f$  0.1 (silica,  $\text{CH}_2\text{Cl}_2$ ) gave product **6**. Compounds **6d-j** were further purified by boiling in ethanol to remove soluble impurities.

*1,3-Dimethyl-6-phenyl-1H-perimidin-2(3H)-one (6a)*, colorless solid with mp 200–202 °C (EtOH). <sup>1</sup>H NMR (600 MHz, CDCl<sub>3</sub>): δ = 3.45 (s, 3 H), 3.47 (s, 3 H), 6.60 (d, *J* = 7.2 Hz, 1 H), 6.63 (d, *J* = 7.9 Hz, 1 H), 7.30–7.33 (m, 2 H), 7.35–7.40 (m, 2 H), 7.42–7.48 (m, 4 H) ppm. <sup>13</sup>C NMR (150 MHz, CDCl<sub>3</sub>): δ = 30.7, 30.8, 103.8, 104.3, 114.9, 117.6, 127.1, 127.8, 128.4, 128.7, 129.8, 131.8, 132.4, 137.2, 138.0, 140.5, 150.9 ppm. HRMS (ESI): *m/z* calcd. for C<sub>19</sub>H<sub>16</sub>N<sub>2</sub>O [M]: 288.1257, found 289.1260; [M+H<sup>+</sup>]: 289.1335, found 289.1320; [M+Na<sup>+</sup>]: 311.1155, found 311.1155.

*1,3-Dimethyl-6-(p-tolyl)-1H-perimidin-2(3H)-one (6b)*, colorless solid with mp 212–214 °C (EtOH). <sup>1</sup>H NMR (250 MHz, CDCl<sub>3</sub>): δ = 2.45 (s, 3 H), 3.48 (s, 3 H), 3.49 (s, 3 H), 6.57–6.70 (m, 2 H), 7.25–7.43 (m, 7 H) ppm. <sup>13</sup>C NMR (62.9 MHz, CDCl<sub>3</sub>): δ = 21.3, 30.8, 30.9, 103.9, 104.3, 115.0, 117.7, 127.8, 128.6, 129.2, 129.7, 131.8, 132.5, 136.8, 137.1, 137.6, 137.9, 150.9 ppm. HRMS (ESI): *m/z* calcd. for C<sub>20</sub>H<sub>18</sub>N<sub>2</sub>NaO [M+Na<sup>+</sup>]: 325.1311, found 325.1302.

*1,3-Dimethyl-6-(m-tolyl)-1H-perimidin-2(3H)-one (6c)*, colorless solid with mp 194–195 °C (EtOH). <sup>1</sup>H NMR (250 MHz, CDCl<sub>3</sub>): δ = 2.41 (s, 3 H), 3.45 (s, 3 H), 3.46 (s, 3 H), 6.55–6.68 (m, 2 H), 7.15–7.40 (m, 7 H) ppm. <sup>13</sup>C NMR (62.9 MHz, CDCl<sub>3</sub>): δ = 21.6, 30.8, 30.9, 103.9, 104.3, 115.0, 117.7, 126.9, 127.8, 127.9, 128.3, 128.6, 130.5, 132.0, 132.4, 137.1, 137.9, 138.1, 140.5, 150.9 ppm. HRMS (ESI): *m/z* calcd. for C<sub>20</sub>H<sub>18</sub>N<sub>2</sub>NaO [M+Na<sup>+</sup>]: 325.1311, found 325.1307.

*6-(4-Methoxyphenyl)-1,3-dimethyl-1H-perimidin-2(3H)-one (6d)*, colorless solid with mp 211–213 °C. <sup>1</sup>H NMR (250 MHz, CDCl<sub>3</sub>): δ = 3.45 (s, 3 H), 3.46 (s, 3 H), 3.86 (s, 3 H), 6.57–6.65 (m, 2 H), 6.99 (dm, *J* = 8.8 Hz, 2 H), 7.27–7.40 (m, 5 H) ppm. <sup>13</sup>C NMR (62.9 MHz, CDCl<sub>3</sub>): δ = 30.7, 30.8, 55.4, 103.9, 104.3, 113.9, 115.0, 117.7, 127.7, 128.6, 130.9, 131.5, 132.6, 132.9, 137.0, 138.0, 150.9, 158.8 ppm. HRMS (ESI): *m/z* calcd. for C<sub>20</sub>H<sub>18</sub>N<sub>2</sub>NaO<sub>2</sub> [M+Na<sup>+</sup>]: 341.1260, found 341.1252.

*1,3-Dimethyl-6-(naphthalen-1-yl)-1H-perimidin-2(3H)-one (6e)*, colorless solid with mp 239–240 °C. <sup>1</sup>H NMR (250 MHz, CDCl<sub>3</sub>): δ = 3.51 (s, 3 H), 3.54 (s, 3 H), 6.62 (d, *J* = 7.6 Hz, 1 H), 6.73 (d, *J* = 7.9 Hz, 1 H), 6.83 (d, *J* = 8.3 Hz, 1 H), 7.20 (t, *J* = 8.2 Hz, 1 H), 7.31 (ddd, *J* = 8.5, 7.9, 1.2 Hz, 1 H), 7.37–7.53 (m, 4 H), 7.58 (m, 1 H), 7.94 (d, *J* = 7.9 Hz, 2 H) ppm. <sup>13</sup>C NMR (62.9 MHz, CDCl<sub>3</sub>): δ = 30.8, 30.9, 103.8, 104.3, 114.7, 118.3, 125.6, 125.9, 126.0, 126.4, 127.8, 127.9(2C), 128.3, 129.6, 129.9, 132.8, 133.6, 133.7, 137.5, 137.9, 138.2, 151.0 ppm. HRMS (ESI): *m/z* calcd. for C<sub>23</sub>H<sub>19</sub>N<sub>2</sub>O [M+H<sup>+</sup>]: 339.1492, found 339.1494.

*1,3-Dimethyl-6-(naphthalen-2-yl)-1H-perimidin-2(3H)-one (6f)*, colorless solid with mp 273–274 °C. <sup>1</sup>H NMR (600 MHz, CDCl<sub>3</sub>): δ = 3.48 (s, 3 H), 3.50 (s, 3 H), 6.63 (d, *J* = 7.6 Hz, 1 H), 6.68 (d, *J* = 7.9 Hz, 1 H), 7.32 (dd, *J* = 8.5, 7.6 Hz, 1 H), 7.39 (dd, *J* = 8.6, 0.8 Hz, 1 H), 7.42 (d, *J* = 7.8 Hz, 1 H), 7.48–7.52 (m, 2 H), 7.57 (dd, *J* = 8.3, 1.7 Hz, 1 H), 7.83–7.92 (m, 4 H) ppm. <sup>13</sup>C NMR (150 MHz, CDCl<sub>3</sub>): δ = 30.7, 30.8, 103.9, 104.3, 115.1, 117.7, 125.9, 126.2, 127.7, 127.8, 127.9, 128.0, 128.3, 128.4, 129.0, 131.8, 132.6, 132.7, 133.7, 137.5, 138.1, 138.2, 150.9 ppm. HRMS (ESI): *m/z* calcd. for C<sub>23</sub>H<sub>19</sub>N<sub>2</sub>O [M+H<sup>+</sup>]: 339.1492, found 339.1494.

*1,3-Dimethyl-6-(pyridin-3-yl)-1H-perimidin-2(3H)-one (6g)*, beige solid with mp 233–234 °C. <sup>1</sup>H NMR (250 MHz, CDCl<sub>3</sub>): δ = 3.46 (s, 3 H), 3.47 (s, 3 H), 6.61–6.68 (m, 2 H), 7.26–7.47 (m, 4 H), 7.78 (br d, *J* = 7.8 Hz, 1 H), 8.40–9.00 (m, 2 H) ppm. <sup>13</sup>C NMR (62.9 MHz, CDCl<sub>3</sub>): δ = 30.8, 30.9, 103.9, 104.7, 115.0, 116.8, 127.7, 128.4, 129.3, 132.3, 137.2, 138.0, 138.1, 148.2, 150.4, 150.8 ppm. HRMS (ESI): *m/z* calcd. for C<sub>18</sub>H<sub>16</sub>N<sub>3</sub>O [M+H<sup>+</sup>]: 290.1288, found 290.1283.

*1,3-Dimethyl-6-(quinolin-3-yl)-1H-perimidin-2(3H)-one (6h)*, pale yellow solid with mp 323-325 °C. <sup>1</sup>H NMR (250 MHz, CDCl<sub>3</sub>): δ = 3.49 (s, 3 H), 3.51 (s, 3 H), 6.67 (dd, *J* = 6.9, 1.7 Hz, 1 H), 6.71 (d, *J* = 8.0 Hz, 1 H), 7.30-7.38 (m, 2 H), 7.42 (d, *J* = 7.9 Hz, 1 H), 7.60 (ddd, *J* = 8.1, 6.9, 1.2 Hz, 1 H), 7.75 (ddd, *J* = 8.4, 6.9, 1.5 Hz, 1 H), 7.87 (dd, *J* = 8.1, 1.3 Hz, 1 H), 8.18 (d, *J* = 8.8 Hz, 1 H), 8.23 (d, *J* = 2.2 Hz, 1 H), 9.01 (d, *J* = 2.2 Hz, 1 H) ppm. <sup>13</sup>C NMR (150 MHz, CDCl<sub>3</sub>): δ = 30.8, 30.9, 104.0, 104.7, 115.0, 116.9, 126.9, 127.8, 128.0, 128.4, 129.3, 129.4, 129.7, 132.6, 133.5, 135.8, 138.1, 138.2, 147.3, 150.8, 152.0 ppm. HRMS (ESI): *m/z* calcd. for C<sub>22</sub>H<sub>18</sub>N<sub>3</sub>O [M+H<sup>+</sup>]: 340.1444, found 340.1449.

*6-(Anthracen-9-yl)-1,3-dimethyl-1H-perimidin-2(3H)-one (6i)*, pale yellow solid with mp 332-334 °C (decomp.). <sup>1</sup>H NMR (250 MHz, CDCl<sub>3</sub>): δ = 3.53 (s, 3 H), 3.60 (s, 3 H), 6.49 (d, *J* = 8.3 Hz, 1 H), 6.61 (d, *J* = 7.6 Hz, 1 H), 6.83 (d, *J* = 7.8 Hz, 1 H), 7.12 (t, *J* = 8.1 Hz, 1 H), 7.21-7.32 (m, 2 H), 7.40-7.53 (m, 5 H), 8.10 (d, *J* = 8.4 Hz, 2 H), 8.57 (s, 1 H) ppm. <sup>13</sup>C NMR (62.9 MHz, CDCl<sub>3</sub>): δ = 30.9 (2C), 104.0, 104.4, 114.9, 118.3, 125.2, 125.6, 126.7, 126.9, 127.6, 128.1, 128.5, 130.9, 131.0, 131.6, 134.2, 134.7, 137.8, 138.0, 151.1 ppm. HRMS (ESI): *m/z* calcd. for C<sub>27</sub>H<sub>21</sub>N<sub>2</sub>O [M+H<sup>+</sup>]: 389.1648, found 389.1649.

*1,3-Dimethyl-6-(pyren-1-yl)-1H-perimidin-2(3H)-one (6j)*, beige solid with mp 331-332 °C (decomp.). <sup>1</sup>H NMR (250 MHz, CDCl<sub>3</sub>): δ = 3.51 (s, 3 H), 3.57 (s, 3 H), 6.62 (d, *J* = 7.6 Hz, 1 H), 6.77-6.84 (m, 2 H), 7.19 (t, *J* = 8.3 Hz, 1 H), 7.51 (d, *J* = 7.8 Hz, 1 H), 7.68 (d, *J* = 9.2 Hz, 1 H), 7.89 (d, *J* = 9.2 Hz, 1 H), 7.93-8.05 (m, 2 H), 8.08-8.15 (m, 3 H), 8.20 (d, *J* = 8.5 Hz, 1 H), 8.26 (d, *J* = 7.8 Hz, 1 H) ppm. <sup>13</sup>C NMR (62.9 MHz, CDCl<sub>3</sub>): δ = 30.9 (2C), 103.9, 104.4, 118.4, 124.78, 124.86, 124.91, 125.0, 125.2, 125.6, 126.1, 127.4, 127.5, 128.0, 128.5, 129.8, 129.9, 130.1, 130.2, 130.9, 131.0, 131.4, 133.7, 135.6, 137.6, 138.0, 165.5 ppm. HRMS (ESI): *m/z* calcd. for C<sub>29</sub>H<sub>21</sub>N<sub>2</sub>O [M+H<sup>+</sup>]: 413.1648, found 413.1650.

**Synthesis of 7-aryl-6-brom-1,3-dimethyl-1H-perimidin-2(3H)-ones 8** (general procedure, Table 2). A mixture of 6,7-dibromo-1,3-dimethyl-1H-perimidin-2(3H)-one **7** (185 mg, 0.5 mmol), Pd(PPh<sub>3</sub>)<sub>4</sub> (29 mg, 0.025 mmol), arylboronic acid (0.75–1.00 mmol), 2M K<sub>2</sub>CO<sub>3</sub> (3 mL) in toluene (5 mL) was refluxed for 24-48 h under argon. The reaction mixture was then diluted with water (10 mL) and extracted with CH<sub>2</sub>Cl<sub>2</sub> (3 × 10 mL). The extract was dried over Na<sub>2</sub>SO<sub>4</sub> and evaporated to dryness.

In cases of compounds **8a,d** syntheses, the residue was purified by flash column chromatography on Al<sub>2</sub>O<sub>3</sub> (2×20 cm), using CH<sub>2</sub>Cl<sub>2</sub>–hexane (1:1, v/v) as an eluent. The fraction with *R<sub>f</sub>* 0.6-0.7 gave compound **8** with a small admixture of compounds **7** and **3**. Purification of compounds **8b,c,e** was carried out by column chromatography on silica (2×20 cm), using CH<sub>2</sub>Cl<sub>2</sub> as an eluent. The fraction with *R<sub>f</sub>* 0.2-0.4 (for **8b,c**) or 0.1 (**8e**) gave the corresponding compound **5** with a small admixture of compounds **7** and **3**. Compounds **8** were more soluble in most organic solvents. The crude product **8** was heated with 2 mL of acetonitrile (heptane or EtOH) and insoluble impurities **7** and **3** were filtered off.

From subsequent fractions with a lower *R<sub>f</sub>*, the starting dibromide **7** and then the corresponding diaryl derivative **3** were isolated.

*6-Bromo-1,3-dimethyl-7-phenyl-1H-perimidin-2(3H)-one (8a)*, colorless solid with mp 153-155 °C. <sup>1</sup>H NMR (250 MHz, CDCl<sub>3</sub>): δ = 3.44 (s, 3 H), 3.47 (s, 3 H), 6.47 (d, *J* = 8.4 Hz, 1 H), 6.69 (d, *J* = 8.1 Hz, 1 H), 7.20–7.45 (m, 6 H), 7.65 (d, *J* = 8.3 Hz, 1 H) ppm. <sup>13</sup>C NMR (62.9 MHz, CDCl<sub>3</sub>): δ = 31.17, 31.20, 104.7, 105.5, 110.3, 116.7, 126.8, 127.4, 129.8, 130.3, 132.1, 132.9, 135.1, 137.5, 137.9, 142.5, 150.3 ppm. HRMS (ESI): *m/z* calcd. for C<sub>19</sub>H<sub>15</sub>BrN<sub>2</sub>O [M]: 366.0362 (<sup>79</sup>Br), 368.0344 (<sup>81</sup>Br), found 366.0369 (<sup>79</sup>Br), 368.0358 (<sup>81</sup>Br).

*6-Bromo-1,3-dimethyl-7-(m-tolyl)-1H-perimidin-2(3H)-one (8b)*, colorless solid with mp 157-159 °C. <sup>1</sup>H NMR (250 MHz, CDCl<sub>3</sub>): δ = 2.39 (s, 3 H), 3.48 (s, 3 H), 3.50 (s, 3 H), 6.50 (d, *J* = 8.3 Hz, 1 H), 6.65–6.80 (m, 2 H), 7.05–7.45 (m, 5 H), 7.68 (d, *J* = 8.3 Hz, 1 H) ppm. <sup>13</sup>C NMR (150 MHz, CDCl<sub>3</sub>): δ = 21.4, 31.1, 104.6, 105.3, 110.4, 116.7, 127.2, 127.37, 127.41, 129.8, 131.1, 132.2, 132.8, 135.0, 136.8, 137.4, 137.9, 142.3, 150.3 ppm. HRMS (ESI): *m/z* calcd. for C<sub>20</sub>H<sub>17</sub>BrN<sub>2</sub>NaO [M+Na<sup>+</sup>]: 403.0416 (<sup>79</sup>Br), 405.0401 (<sup>81</sup>Br), found 403.0404 (<sup>79</sup>Br), 405.0385 (<sup>81</sup>Br).

*6-Bromo-7-(4-methoxyphenyl)-1,3-dimethyl-1H-perimidin-2(3H)-one (8c)*, colorless solid with mp 188-190 °C. <sup>1</sup>H NMR (250 MHz, CDCl<sub>3</sub>): δ = 3.47 (s, 3 H), 3.50 (s, 3 H), 3.88 (s, 3 H), 6.49 (d, *J* = 8.4 Hz, 1 H), 6.70 (d, *J* = 8.1 Hz, 1 H), 6.92 (dm, *J* = 8.7 Hz, 2 H), 7.19 (dm, *J* = 8.7 Hz, 2 H), 7.37 (d, *J* = 8.0 Hz, 1 H), 7.68 (d, *J* = 8.3 Hz, 1 H) ppm. <sup>13</sup>C NMR (150 MHz, CDCl<sub>3</sub>): δ = 31.1, 55.3, 104.6, 105.3, 110.3, 112.8, 116.7, 130.0, 131.2, 131.7, 132.9, 134.8, 135.0, 137.3, 137.9, 150.2, 158.8 ppm. HRMS (ESI): *m/z* calcd. for C<sub>20</sub>H<sub>17</sub>BrN<sub>2</sub>NaO<sub>2</sub> [M+Na<sup>+</sup>]: 419.0366 (<sup>79</sup>Br), 421.0351 (<sup>81</sup>Br), found 419.0359 (<sup>79</sup>Br), 421.0339 (<sup>81</sup>Br).

*6-Bromo-1,3-dimethyl-7-(naphthalen-1-yl)-1H-perimidin-2(3H)-one (8d)*, beige solid with mp 214-216 °C (decomp.). <sup>1</sup>H NMR (250 MHz, CDCl<sub>3</sub>): δ = 3.48 (s, 3 H), 3.52 (s, 3 H), 6.49 (d, *J* = 8.4 Hz, 1 H), 6.76 (d, *J* = 8.1 Hz, 1 H), 7.27–7.32 (m, 2 H), 7.35 (dd, *J* = 7.0, 1.2 Hz, 1 H), 7.43–7.53 (m, 3 H), 7.59 (d, *J* = 8.4 Hz, 1 H), 7.85–7.92 (m, 2 H) ppm. <sup>13</sup>C NMR (62.9 MHz, CDCl<sub>3</sub>): δ = 31.2 (2C), 104.9, 105.6, 110.2, 116.6, 125.1, 125.5, 125.8, 126.4, 127.6, 128.1 (2C), 129.6, 130.8, 133.1, 133.4, 134.6, 135.1, 137.9, 138.0, 140.2, 150.4 ppm. HRMS (ESI): *m/z* calcd. for C<sub>23</sub>H<sub>17</sub>BrN<sub>2</sub>NaO [M+Na<sup>+</sup>]: 439.0417 (<sup>79</sup>Br), 441.0399 (<sup>81</sup>Br), found 439.0418 (<sup>79</sup>Br), 441.0411 (<sup>81</sup>Br).

*6-Bromo-1,3-dimethyl-7-(quinolin-3-yl)-1H-perimidin-2(3H)-one (8e)*, yellow-orange solid with mp 255-256 °C (decomp.). <sup>1</sup>H NMR (250 MHz, CDCl<sub>3</sub>): δ = 3.50 (s, 3 H), 3.53 (s, 3 H), 6.57 (d, *J* = 8.4 Hz, 1 H), 6.77 (d, *J* = 8.1 Hz, 1 H), 7.44 (d, *J* = 8.1 Hz, 1 H), 7.62 (ddd, *J* = 8.1, 6.9, 1.2 Hz, 1 H), 7.68–7.80 (m, 2 H), 7.86 (dd, *J* = 8.1, 1.3 Hz, 1 H), 8.09 d, *J* = 2.2 Hz, 1 H), 8.20 (d, *J* = 8.5 Hz, 1 H), 8.88 (d, *J* = 2.2 Hz, 1 H) ppm. <sup>13</sup>C NMR (62.9 MHz, CDCl<sub>3</sub>): δ = 31.26, 31.30, 104.8, 106.0, 109.9, 116.8, 127.1, 127.68, 127.75, 128.0, 128.9, 129.5, 130.0, 134.1, 135.3, 135.5, 136.0, 138.1, 138.5, 146.3, 150.2, 151.9 ppm. HRMS (ESI): *m/z* calcd. C<sub>22</sub>H<sub>17</sub>BrN<sub>3</sub>O [M+H<sup>+</sup>]: 418.0550 (<sup>79</sup>Br), 420.0535 (<sup>81</sup>Br), found 418.0556 (<sup>79</sup>Br), 420.0538 (<sup>81</sup>Br).

**Synthesis of 6,7-diaryl-1,3-dimethyl-1H-perimidin-2(3H)-ones 3a-d,f** (general procedure, Table 2). A mixture of 6,7-dibromo-1,3-dimethyl-1H-perimidin-2(3H)-one **7** (185 mg, 0.5 mmol), Pd(PPh<sub>3</sub>)<sub>4</sub> (29 mg, 0.025 mmol), arylboronic acid (1.5 mmol), 2M K<sub>2</sub>CO<sub>3</sub> (3 mL) in toluene (5 mL) was refluxed for 48 h under argon. The reaction mixture was then diluted with water (10 mL) and extracted with CH<sub>2</sub>Cl<sub>2</sub> (3 × 10 mL). The extract was dried over Na<sub>2</sub>SO<sub>4</sub> and evaporated to dryness.

In the case of compound **3a** synthesis, the residue was purified by flash column chromatography on Al<sub>2</sub>O<sub>3</sub> (2×20 cm), using CH<sub>2</sub>Cl<sub>2</sub>–hexane (1:1, v/v) as an eluent. The fraction with *R<sub>f</sub>* 0.8 gave a mixture of compounds **8a** and **3a**. Purification of compounds **3b-d,f** was carried out by column chromatography on silica (2×20 cm), using CH<sub>2</sub>Cl<sub>2</sub> as an eluent. The fraction with *R<sub>f</sub>* 0.2-0.4 (for **3b,d,f**) or 0.1 (for **3c**) gave the corresponding compound **3** together with compound **8**. Compounds **8** were more soluble in most organic solvents. The crude product was heated with 2-4 mL of acetonitrile (or EtOH) and insoluble compound **3** was filtered off. The corresponding compound **8** was isolated from the filtrate.

*1,3-Dimethyl-6,7-diphenyl-1H-perimidin-2(3H)-one (3a)*, colorless solid with mp 237–239 °C. <sup>1</sup>H NMR (600 MHz, CDCl<sub>3</sub>): δ = 3.52 (s, 6 H), 6.75 (d, *J* = 8.0 Hz, 2 H), 6.85–6.95 (m, 10 H), 7.34 (d, *J* = 8.0 Hz, 2 H) ppm. <sup>13</sup>C NMR (150 MHz, CDCl<sub>3</sub>): δ = 31.0, 104.5, 116.3, 125.5, 127.2, 127.4, 129.5, 129.8, 130.3, 132.2, 132.7, 137.5, 142.6, 150.7 ppm. HRMS (ESI): *m/z* calcd. for C<sub>25</sub>H<sub>20</sub>N<sub>2</sub>NaO [M+Na<sup>+</sup>]: 387.1468, found 387.1470.

*1,3-Dimethyl-6,7-di(m-tolyl)-1H-perimidin-2(3H)-one (3b)*, colorless solid with mp 275–277 °C. <sup>1</sup>H NMR (600 MHz, CDCl<sub>3</sub>, +55 °C): δ = 2.06 (s, 6 H), 3.52 (s, 6 H), 6.40–7.05 (m, 10 H), 7.33 (d, *J* = 8.0 Hz, 2 H) ppm. <sup>1</sup>H NMR (600 MHz, CDCl<sub>3</sub>, -50 °C): δ = 1.94 (s, 3.3 H), 2.14 (s, 3 H), 3.52 (s, 6.3 H), 6.36 (s, 1 H), 6.65–6.79 (m, 6.5 H), 6.82 (t, *J* = 7.5 Hz, 1.1 H), 7.07 (d, *J* = 5.1 Hz, 2.2 H), 7.37–7.41 (m, 2.1 H) ppm. <sup>13</sup>C NMR (150 MHz, CDCl<sub>3</sub>): δ = 21.0, 31.0, 104.4, 116.3, 125.8, 126.2, 126.9, 127.2, 129.9, 130.4, 132.3, 132.4, 136.2, 137.4, 142.5, 150.7 ppm. HRMS (ESI): *m/z* calcd. for C<sub>27</sub>H<sub>24</sub>N<sub>2</sub>NaO [M+Na]: 415.1781, found 415.1776.

*6,7-Di(4-methoxyphenyl)-1,3-dimethyl-1H-perimidin-2(3H)-one (3c)*, colorless needles with mp 276–278 °C. <sup>1</sup>H NMR (250 MHz, CDCl<sub>3</sub>): δ = 3.53 (s, 6 H), 3.71 (s, 6 H), 6.47 (dm, *J* = 8.7 Hz, 4 H), 6.74 (d, *J* = 8.1 Hz, 2 H), 6.79 (dm, *J* = 8.7 Hz, 4 H), 7.33 (d, *J* = 8.1 Hz, 2 H) ppm. <sup>13</sup>C NMR (62.9 MHz, CDCl<sub>3</sub>): δ = 31.1, 55.3, 104.5, 112.8 (2C), 116.3, 130.2, 130.6 (2C), 131.8, 132.3, 135.3, 137.3, 150.7, 157.5 ppm. HRMS (ESI): *m/z* calcd. for C<sub>27</sub>H<sub>24</sub>N<sub>2</sub>NaO<sub>3</sub> [M+Na<sup>+</sup>]: 447.1679, found 447.1672.

*1,3-Dimethyl-6-(naphthalen-1-yl)-1H-perimidin-2(3H)-one (3d)*, colorless solid with mp 244–246 °C. <sup>1</sup>H NMR (600 MHz, CDCl<sub>3</sub>): δ = 3.58 (s, 6 H), 6.30 (dd, *J* = 8.1, 7.1 Hz, 2 H), 6.40 (dd, *J* = 6.9, 0.9 Hz, 2 H), 6.77 (d, *J* = 7.9 Hz, 2 H), 7.04 (d, *J* = 8.2 Hz, 2 H), 7.19 (d, *J* = 7.8 Hz, 2 H), 7.20–7.27 (m, 4 H), 7.31 (ddd, *J* = 8.0, 6.5, 1.4 Hz, 2 H), 7.53 (d, *J* = 8.1 Hz, 2 H) ppm. <sup>13</sup>C NMR (150 MHz, CDCl<sub>3</sub>): δ = 31.1, 104.4, 115.7, 123.4, 124.9, 125.2, 126.2, 126.4, 127.0, 127.8, 130.3, 132.4, 132.59, 132.65, 132.7, 137.8, 138.9, 150.8 ppm. HRMS (ESI): *m/z* calcd. for C<sub>33</sub>H<sub>25</sub>N<sub>2</sub>O [M+H<sup>+</sup>]: 465.1961, found 465.1964.

*1,3-Dimethyl-6,7-di(naphthalen-2-yl)-1H-perimidin-2(3H)-one (3f)*, colorless solid with mp 234–236 °C. <sup>1</sup>H NMR (600 MHz, CDCl<sub>3</sub>, +30 °C): δ = 3.56 (s, 6 H), 6.80 (d, *J* = 8.0 Hz, 2 H), 6.90–7.22 (m, 8 H), 7.27–7.38 (m, 4 H), 7.46 (d, *J* = 8.0 Hz, 2 H), 7.49–7.59 (m, 2 H) ppm. <sup>1</sup>H NMR (600 MHz, CDCl<sub>3</sub>, -45 °C): δ = 3.56 and 3.57 (two s, 6 H), 6.73 (d, *J* = 8.4 Hz, 1 H), 6.80–6.87 (m, 3 H), 6.96 (dd, *J* = 8.4, 1.7 Hz, 1 H), 6.97–7.02 (m, 1 H), 7.05 (ddd, *J* = 8.0, 6.8, 1.1 Hz, 1 H), 7.15–7.22 (m, 3 H), 7.25–7.36 (m, 4 H), 7.45–7.55 (m, 3 H), 7.60 (d, *J* = 8.0 Hz, 1 H) ppm. <sup>13</sup>C NMR (150 MHz, CDCl<sub>3</sub>): δ = 31.1, 104.5, 116.3, 124.9, 125.2, 125.9, 126.3, 126.9, 127.2, 127.5, 128.0, 131.2, 132.2, 132.5, 133.7, 150.7 ppm. HRMS (ESI): *m/z* calcd. for C<sub>33</sub>H<sub>24</sub>N<sub>2</sub>NaO [M+Na<sup>+</sup>]: 487.1781, found 487.1776.

**Synthesis of 6,7-diaryl-1,3-dimethyl-1H-perimidin-2(3H)-ones 3g,h** (general procedure). A mixture of 6-bromo-1,3-dimethyl-7-(naphthalen-1-yl)-1H-perimidin-2(3H)-one **8d** (210 mg, 0.5 mmol), Pd(PPh<sub>3</sub>)<sub>4</sub> (29 mg, 0.025 mmol), arylboronic acid (0.85 mmol), 2M K<sub>2</sub>CO<sub>3</sub> (3 mL) in toluene (5 mL) was refluxed for 24 h under argon. The reaction mixture was then diluted with water (10 mL) and extracted with CH<sub>2</sub>Cl<sub>2</sub> (3 × 10 mL). The extract was dried over Na<sub>2</sub>SO<sub>4</sub> and evaporated to dryness. The residue was purified by flash column chromatography on silica (2×20 cm), using CH<sub>2</sub>Cl<sub>2</sub> as an eluent. The fraction with *R<sub>f</sub>* 0.2–0.3 gave the corresponding compound **3** with a small admixture of **8d**. The crude product was heated with 2 mL EtOH and less soluble compound **6** was filtered off.

*1,3-Dimethyl-6-(naphthalen-1-yl)-7-phenyl-1H-perimidin-2(3H)-one (3g)*, colorless solid with mp 227–229 °C. <sup>1</sup>H NMR (250 MHz, CDCl<sub>3</sub>): δ = 3.60 (s, 3 H), 3.61 (s, 3 H), 6.27 (t, *J* = 7.3 Hz, 1 H), 6.38 (d, *J* = 7.7 Hz, 1 H), 6.57–6.67 (m, 1 H), 6.70–6.82 (m, 3 H), 6.84 (d, *J* = 8.0 Hz, 1 H), 7.13–7.50 (m, 8 H), 7.63 (d, *J* = 8.2 Hz, 1 H) ppm. <sup>13</sup>C NMR (62.9 MHz, CDCl<sub>3</sub>): δ = 31.1 (2C), 104.4, 104.5, 115.9, 124.9, 125.1, 125.2, 125.4, 126.0, 126.3, 126.9, 127.9, 127.9, 128.0, 129.5, 127.9, 131.3, 132.3, 132.4, 132.8, 133.0, 133.1, 137.5, 137.9, 140.7, 141.6, 150.5 ppm. HRMS (ESI): *m/z* calcd. for C<sub>29</sub>H<sub>22</sub>N<sub>2</sub>NaO [M+Na<sup>+</sup>]: 437.1624, found 437.1624.

*1,3-Dimethyl-6-(naphthalen-1-yl)-7-(*m*-tolyl)-1H-perimidin-2(3H)-one (3h)*, colorless solid with mp 250–252 °C (MeCN). <sup>1</sup>H NMR (600 MHz, CDCl<sub>3</sub>, -50 °C): δ = 1.35 (s, 4.3 H), 1.99 (s, 3 H), 3.560, 3.561, 3.57 and 3.58 (four s, 14.2 H), 6.18–6.20 (m, 2.3 H), 6.25 (t, *J* = 7.7 Hz, 1 H), 6.38–6.42 (m, 1.9 H), 6.45 (d, *J* = 7.5 Hz, 1.5 H), 6.68 (d, *J* = 7.6 Hz, 1.4 H), 6.73 (t, *J* = 7.5 Hz, 2.4 H), 6.76–6.78 (m, 2.4 H), 6.82 (d, *J* = 8.1 Hz, 1.4 H), 6.84 (d, *J* = 8.1 Hz, 1 H), 6.93 (dd, *J* = 7.0, 1.2 Hz, 1.4 H), 7.07–7.11 (m, 2.6 H), 7.14 (ddd, *J* = 8.5, 7.9, 1.2 Hz, 1 H), 7.18 (d, *J* = 8.0 Hz, 1 H), 7.24 (d, *J* = 7.9 Hz, 1.7 H), 7.29–7.47 (m, 11 H), 7.57 (d, *J* = 8.2 Hz, 1 H), 7.62–7.64 (m, 1.4 H), 7.70–7.72 (m, 1.4 H) ppm. <sup>13</sup>C NMR (150 MHz, CDCl<sub>3</sub>): δ = 20.3, 21.1, 31.1, 104.26, 104.31, 104.5, 115.8, 116.0, 123.4, 124.4, 125.0, 125.1, 125.2, 125.25, 125.3, 125.4, 126.15, 126.25, 126.3, 126.35, 126.7, 126.9, 127.65, 127.7, 128.0, 128.2, 129.6, 129.8, 130.1, 130.8, 131.3, 131.4, 132.1, 132.4, 132.44, 132.8, 133.0, 133.1, 133.2, 133.3, 134.8, 135.8, 137.4, 137.5, 137.8, 137.9, 140.3, 141.0, 144.9, 150.7 ppm. HRMS (ESI): *m/z* calcd. for C<sub>30</sub>H<sub>24</sub>N<sub>2</sub>NaO [M+Na<sup>+</sup>]: 451.1781, found 451.1783.

## Copies of NMR spectra

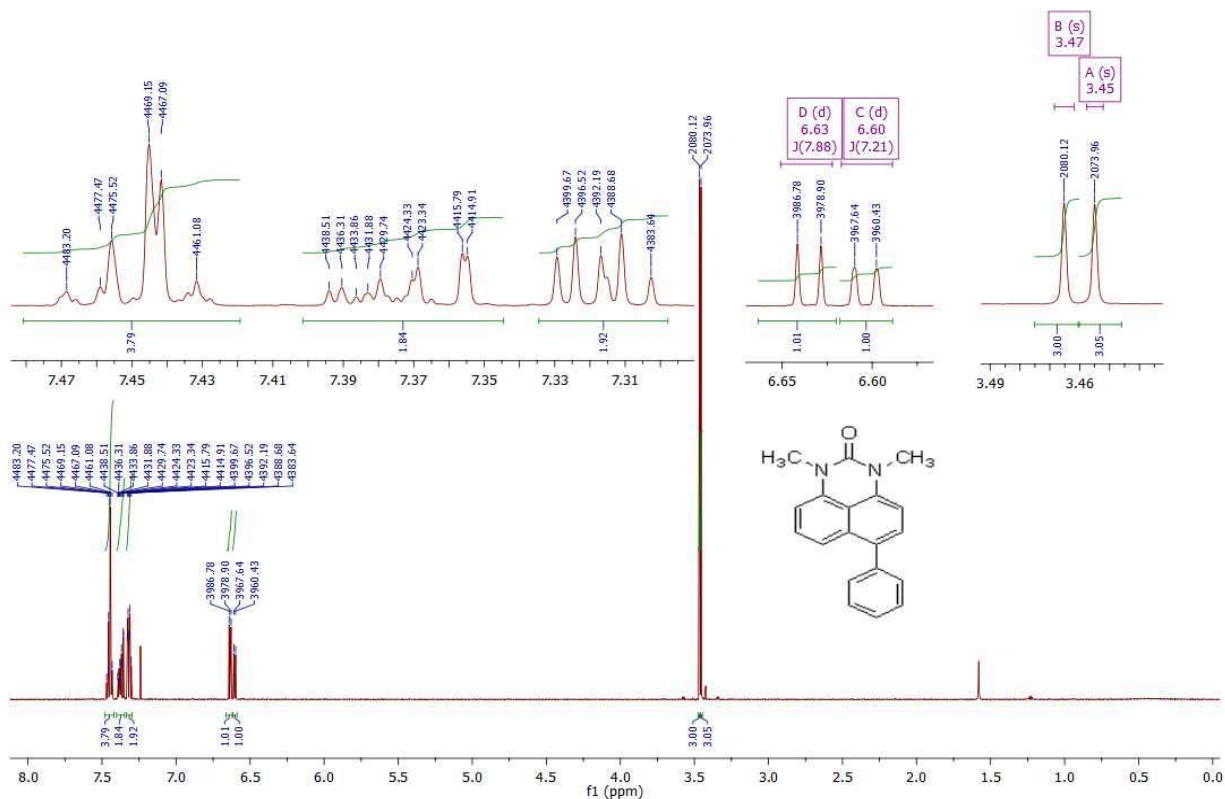Fig. S1.  $^1\text{H}$  NMR spectrum of compound **6a** (600 MHz,  $\text{CDCl}_3$ ).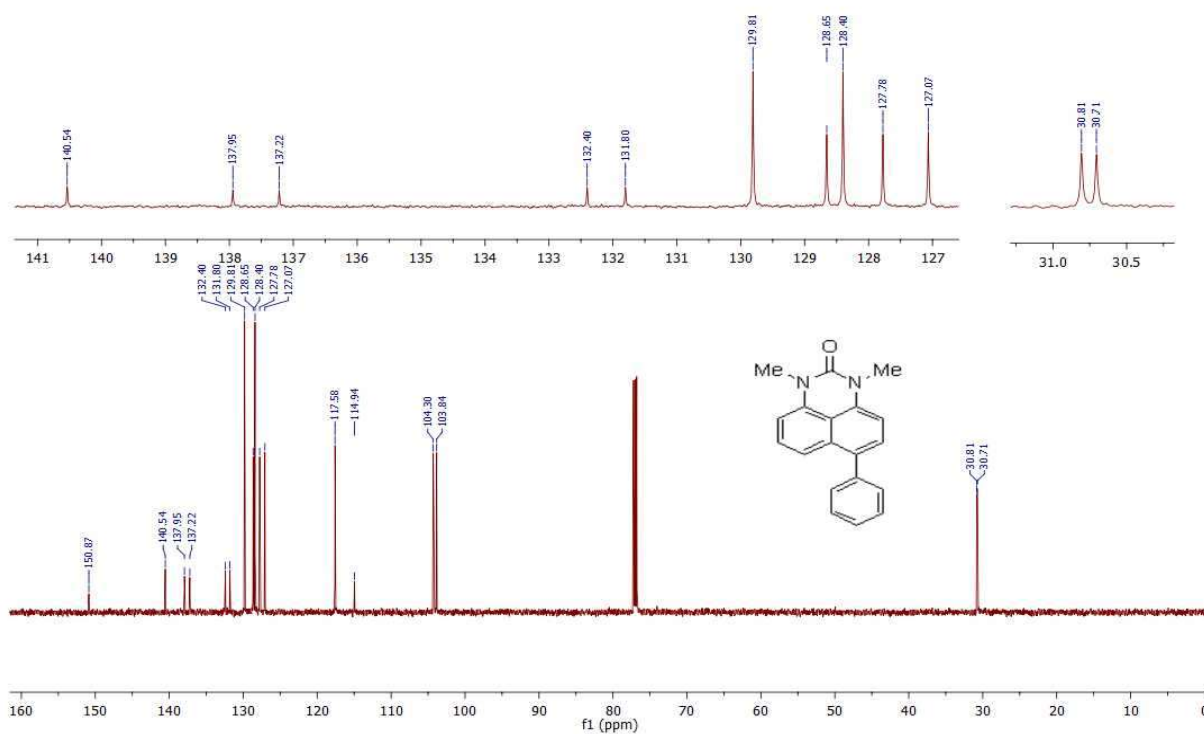Fig. S2.  $^{13}\text{C}\{^1\text{H}\}$  NMR spectrum of compound **6a** (150 MHz,  $\text{CDCl}_3$ ).



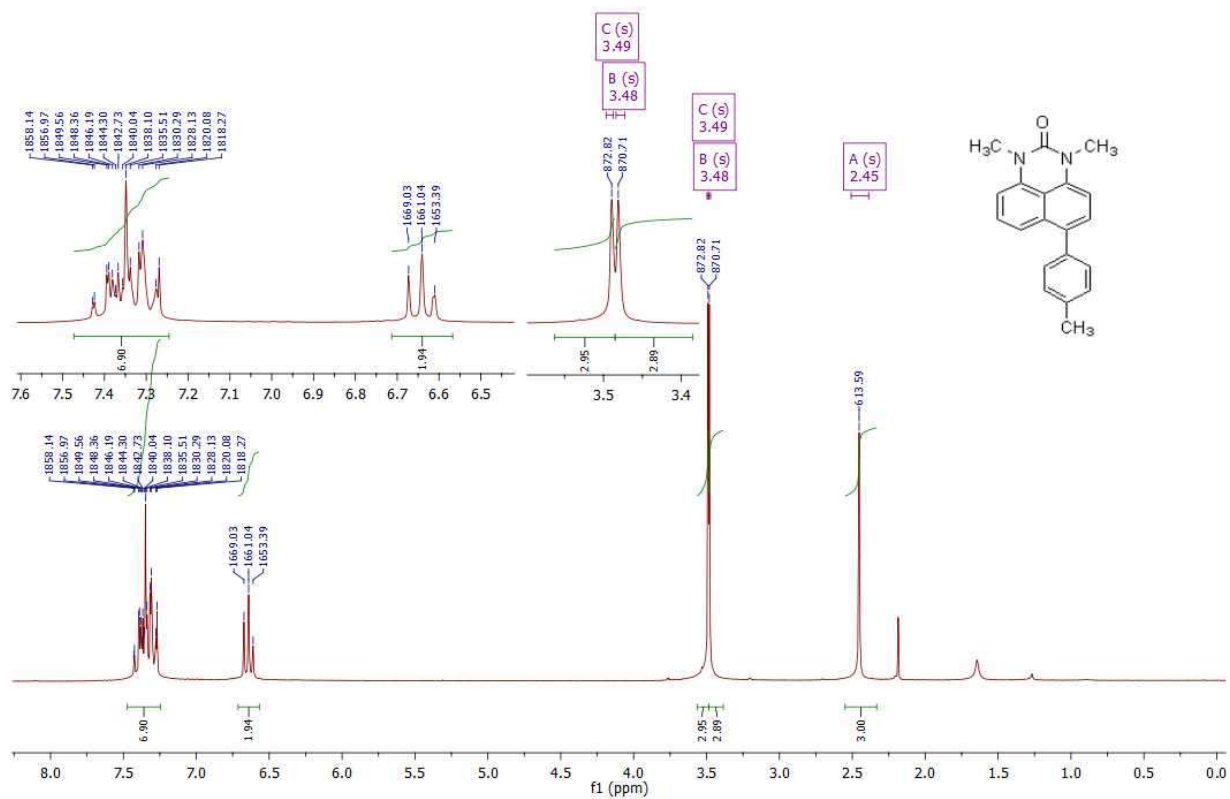

**Fig. S3.** <sup>1</sup>H NMR spectrum of compound **6b** (250 MHz, CDCl<sub>3</sub>).

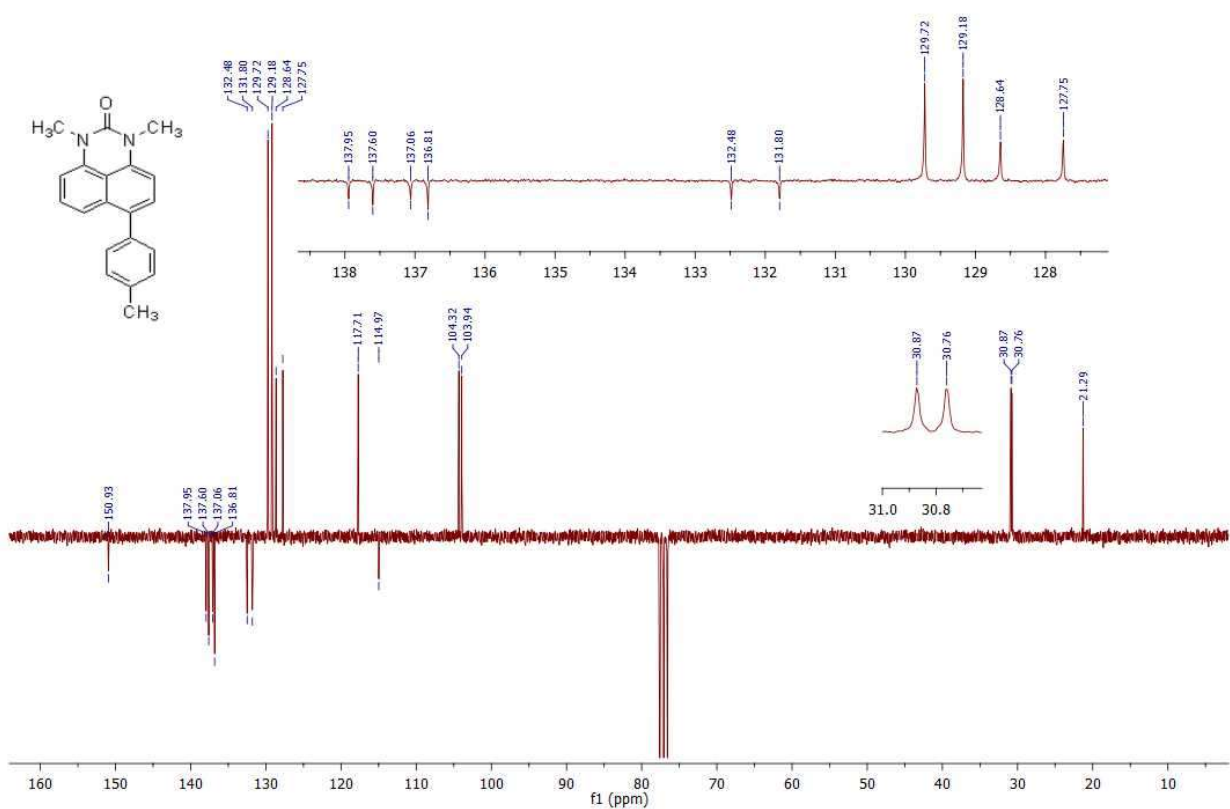

**Fig. S4.** <sup>13</sup>C {<sup>1</sup>H} APT-NMR spectrum of **6b** (62.9 MHz, CDCl<sub>3</sub>).

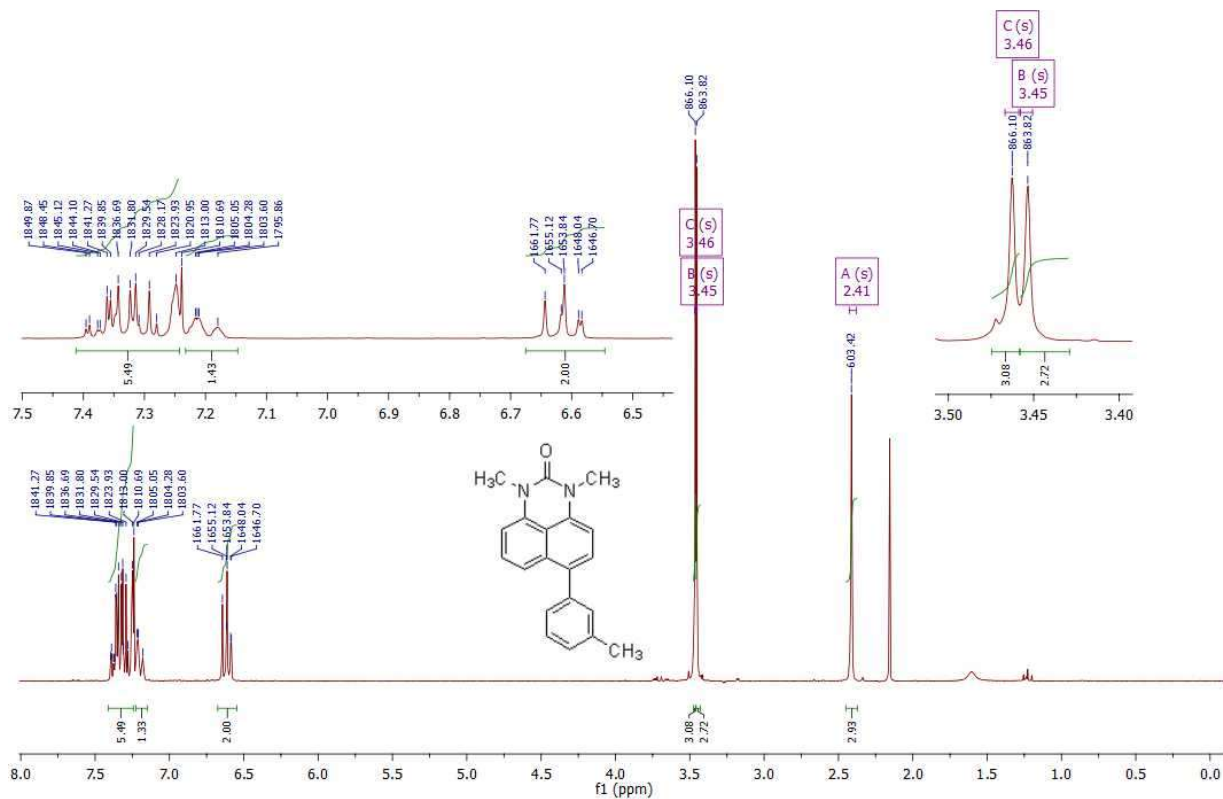

Fig. S5.  $^1\text{H}$  NMR spectrum of compound 6c (250 MHz,  $\text{CDCl}_3$ ).

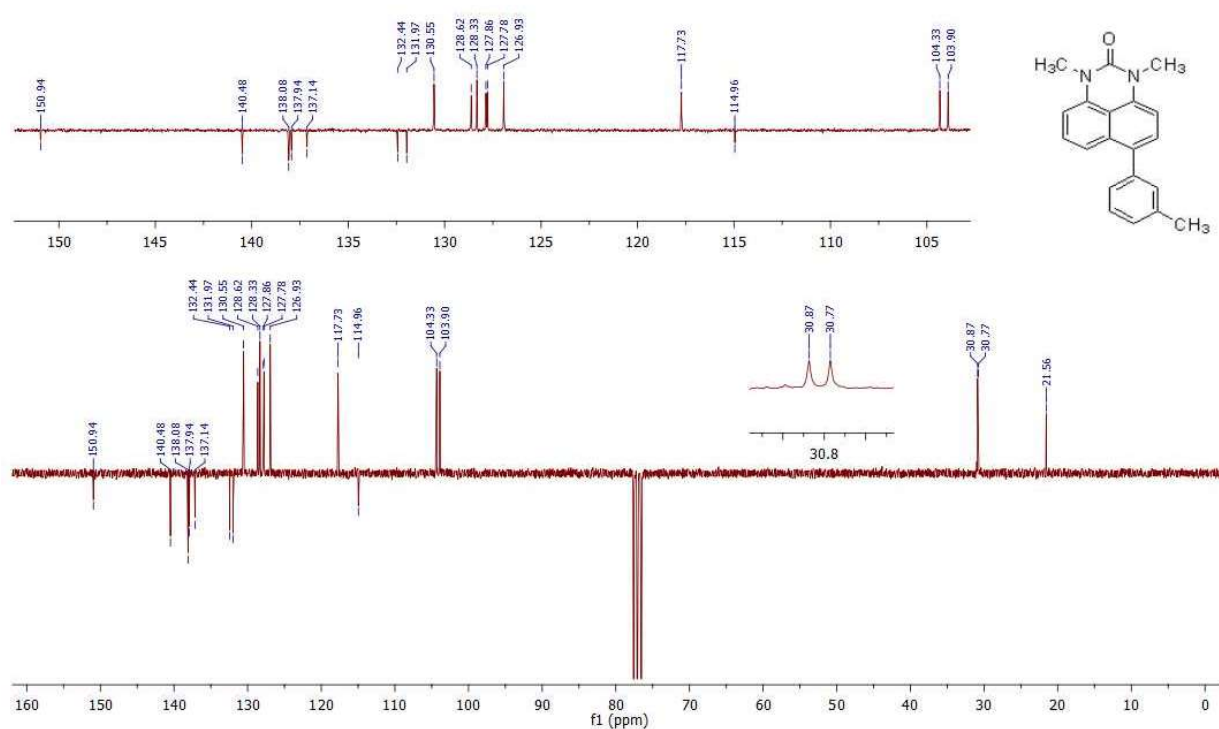

Fig. S6.  $^{13}\text{C}\{^1\text{H}\}$  APT-NMR spectrum of compound 6c (62.9 MHz,  $\text{CDCl}_3$ ).

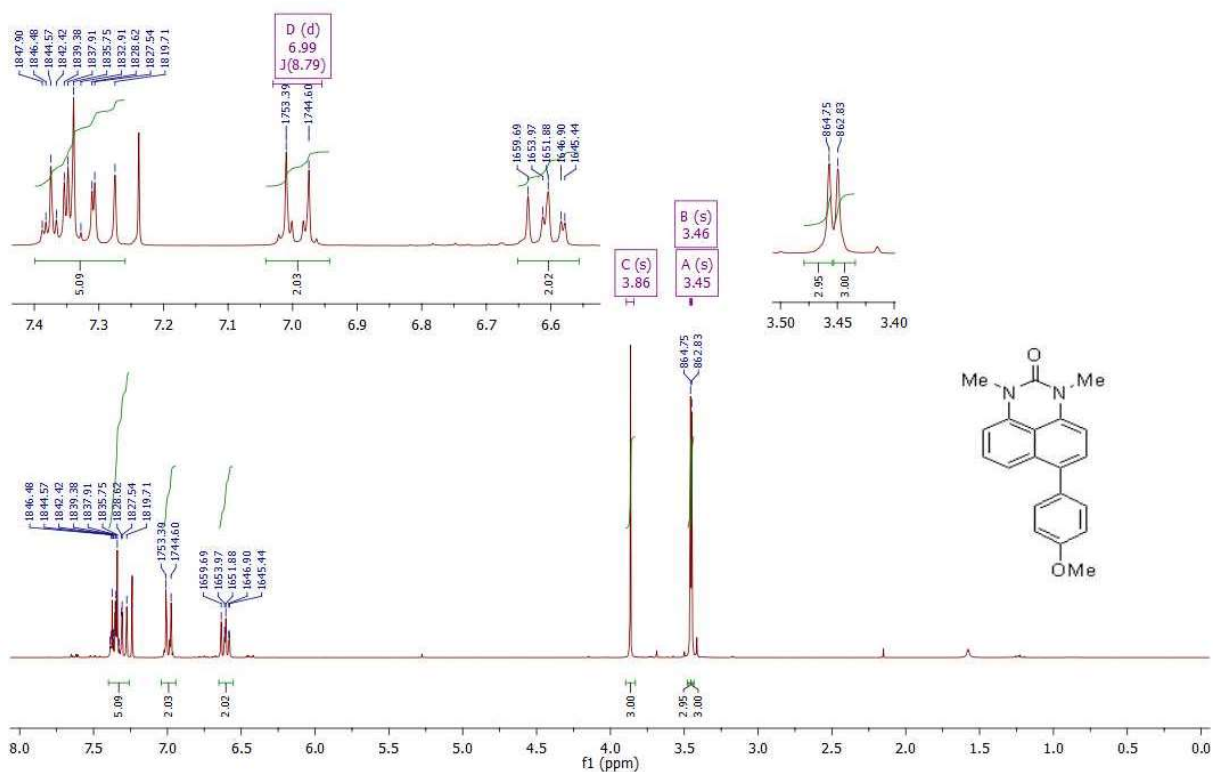

**Fig. S7.**  $^1\text{H}$  NMR spectrum of compound **6d** (250 MHz,  $\text{CDCl}_3$ ).

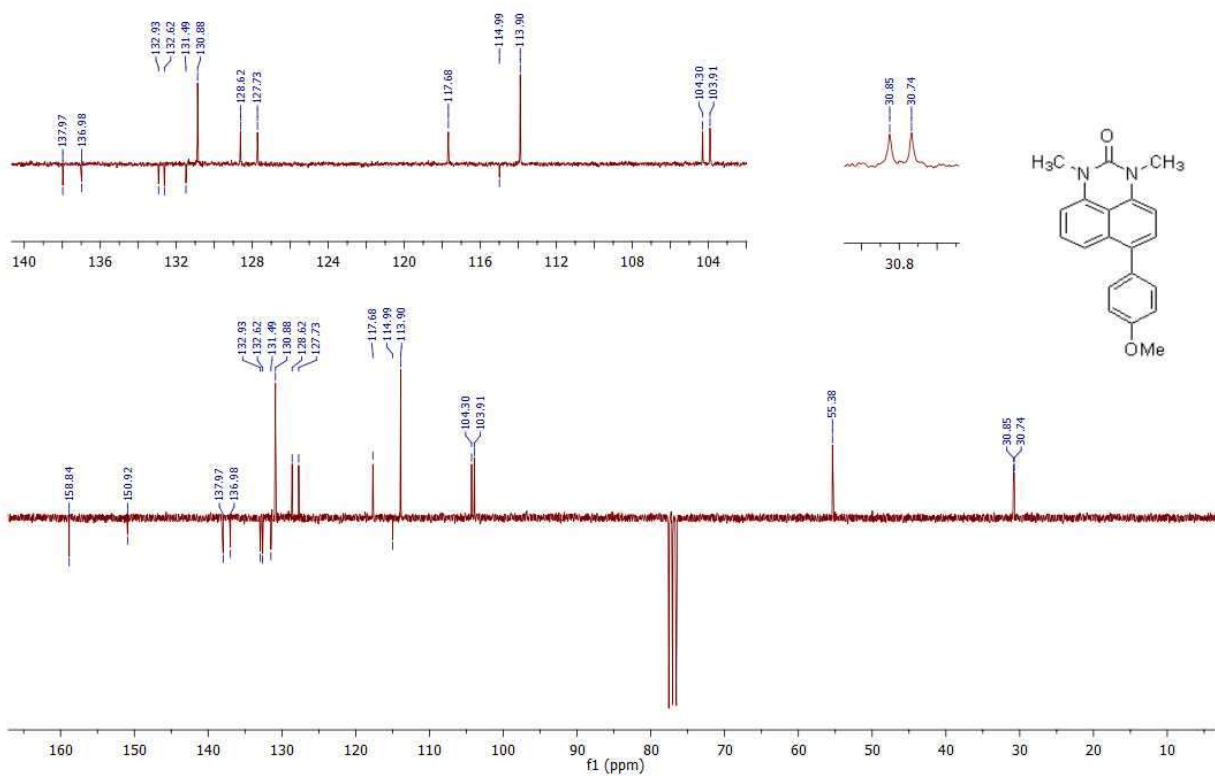

**Fig. S8.**  $^{13}\text{C}\{^1\text{H}\}$  APT-NMR spectrum of compound **6d** (62.9 MHz,  $\text{CDCl}_3$ ).

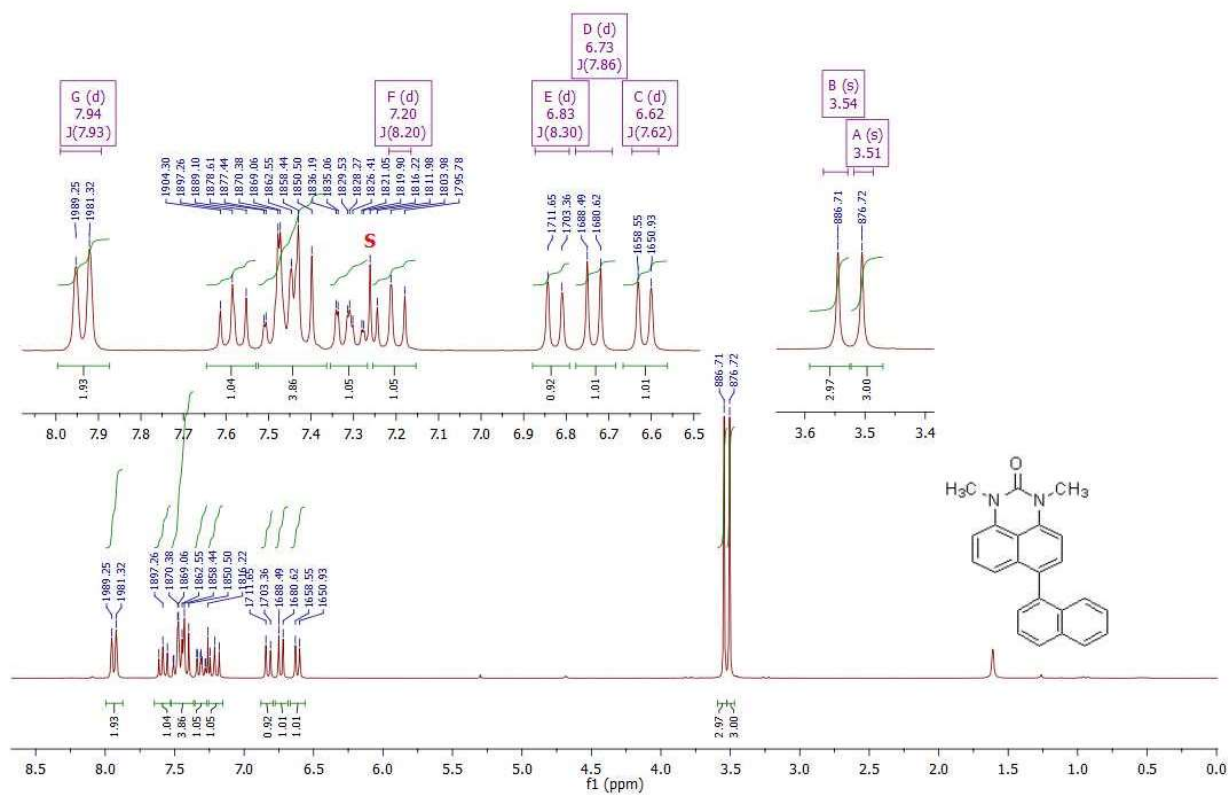

**Fig. S9.**  $^1\text{H}$  NMR spectrum of compound 6e (250 MHz,  $\text{CDCl}_3$ ).

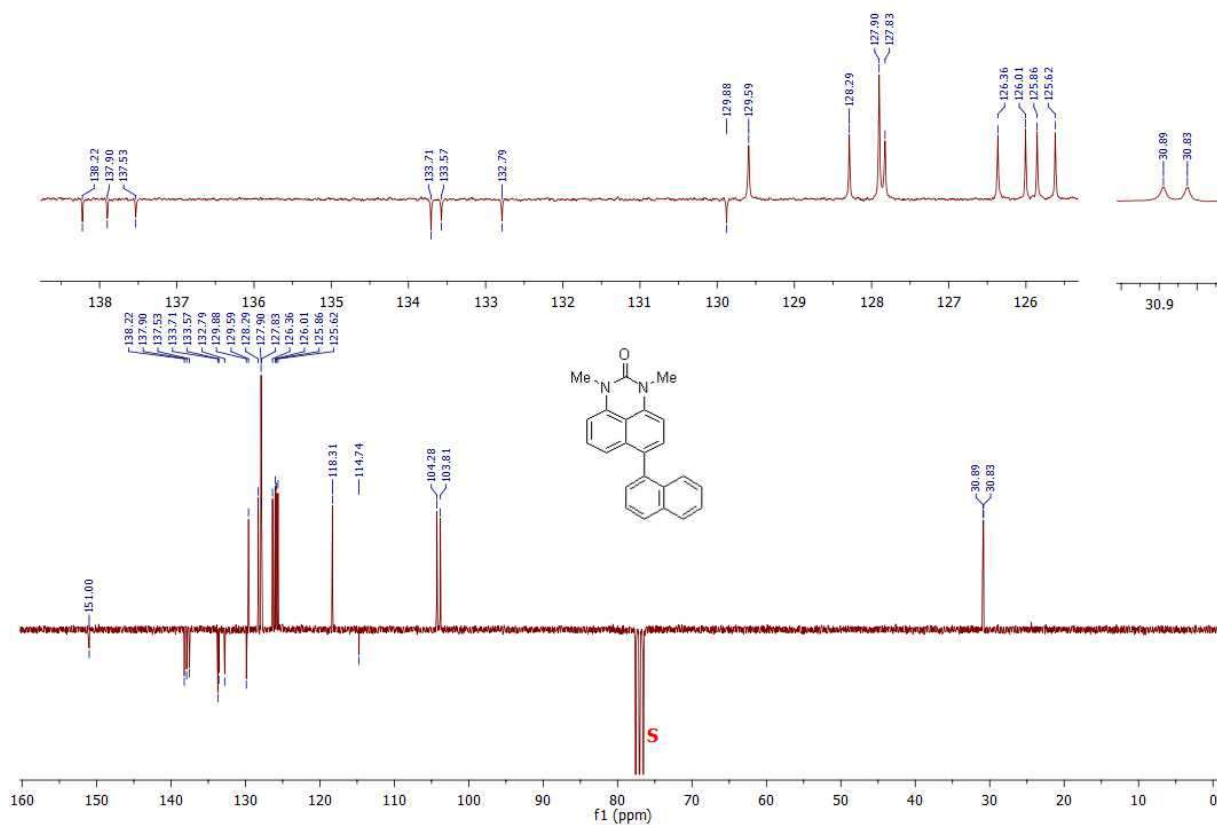

**Fig. S10.**  $^{13}\text{C}\{^1\text{H}\}$  APT-NMR spectrum of compound 6e (150 MHz,  $\text{CDCl}_3$ ).

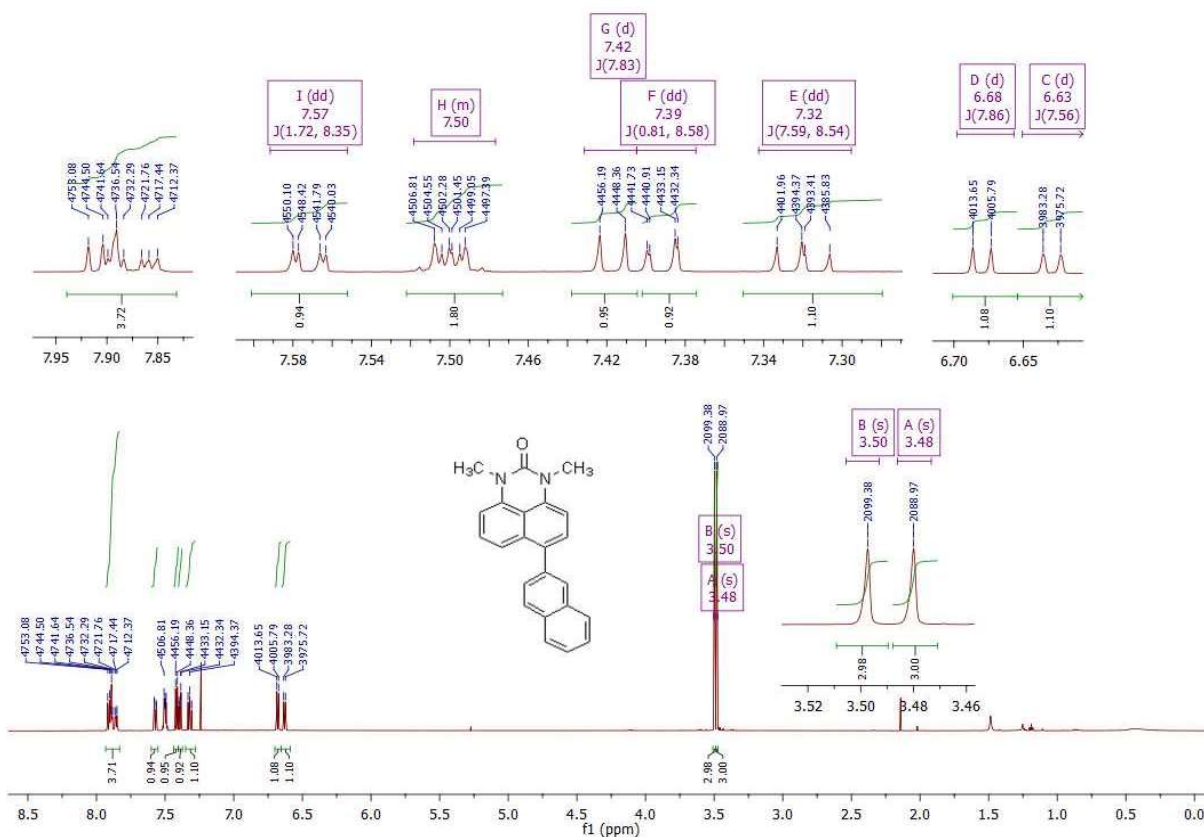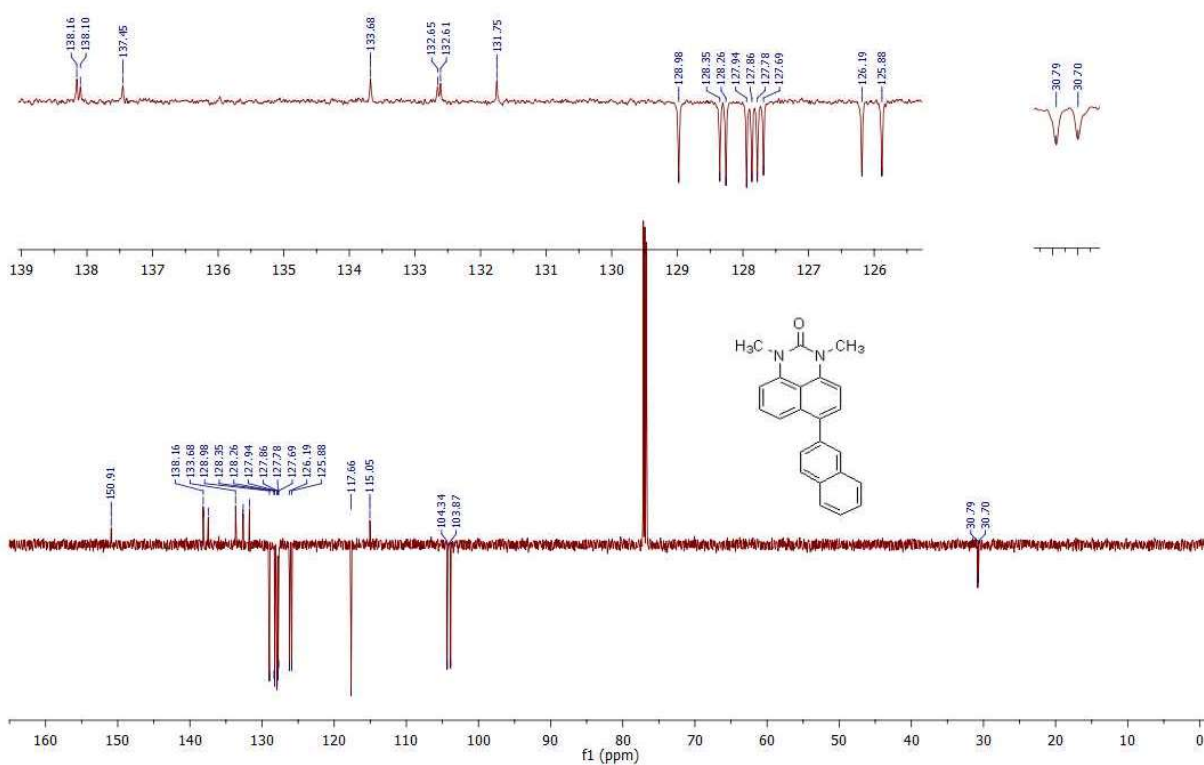



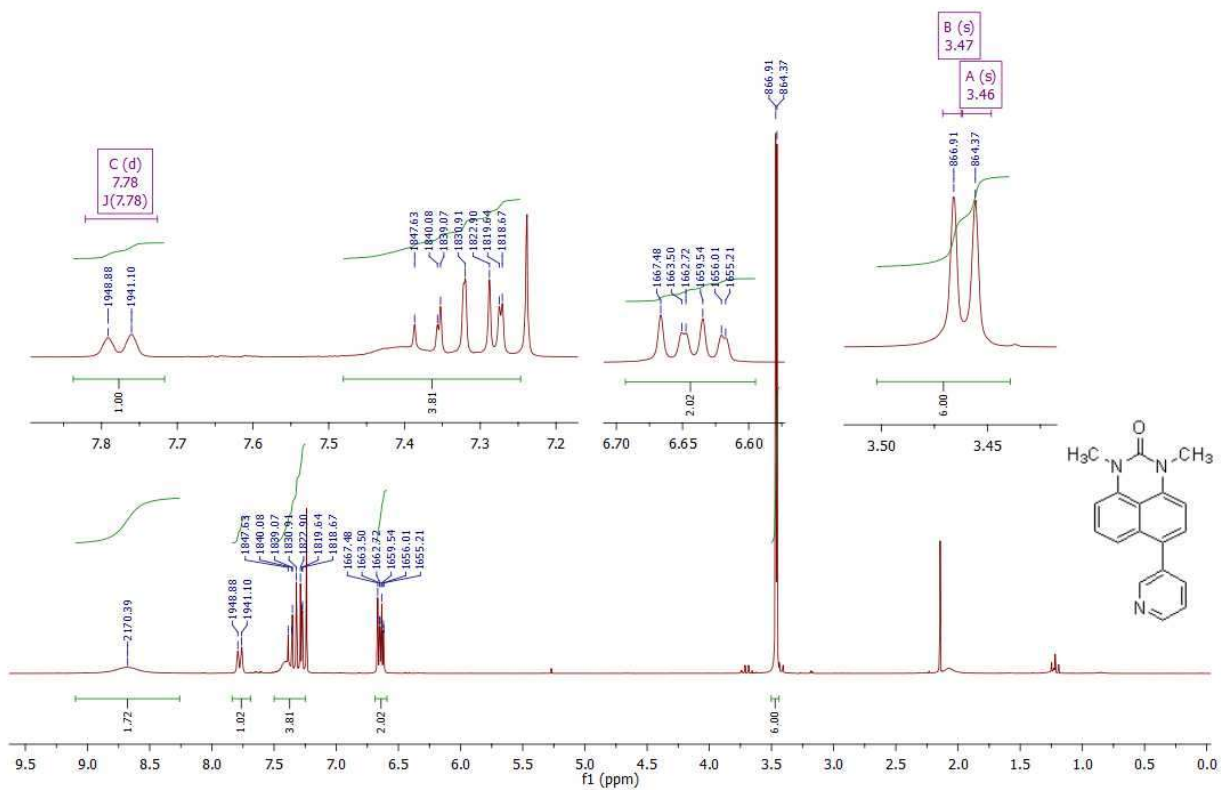

**Fig. S13.** <sup>1</sup>H NMR spectrum of compound **6g** (250 MHz, CDCl<sub>3</sub>).

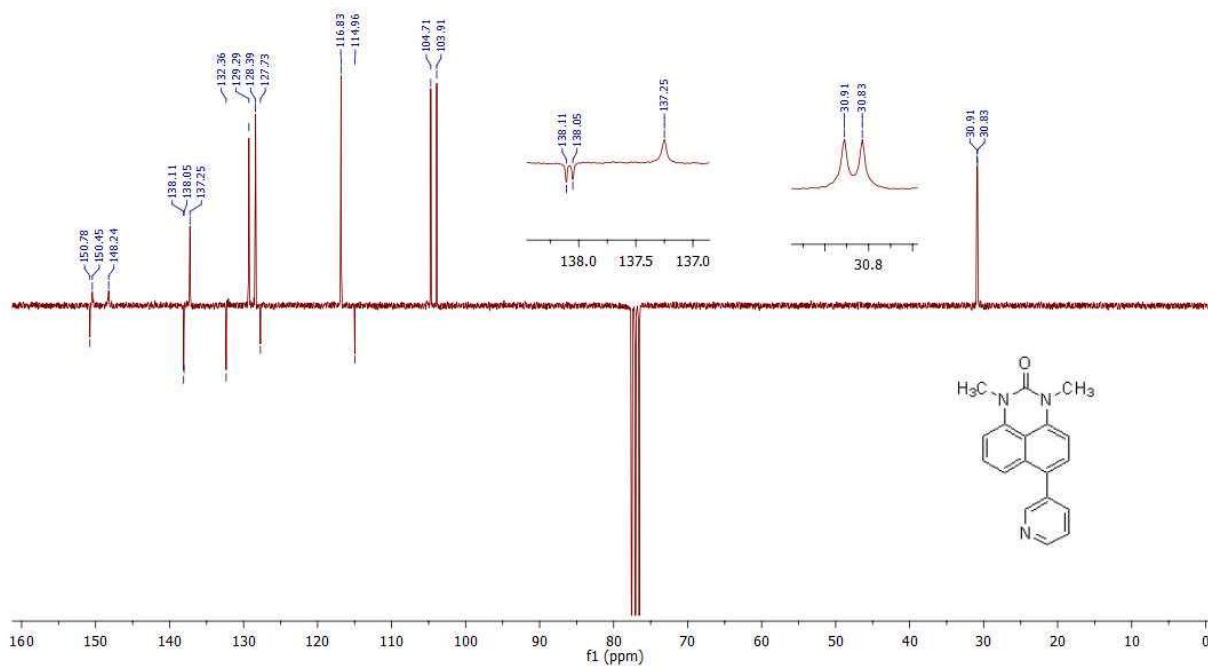

**Fig. S14.** <sup>13</sup>C {<sup>1</sup>H} APT-NMR spectrum of compound **6g** (62.9 MHz, CDCl<sub>3</sub>).

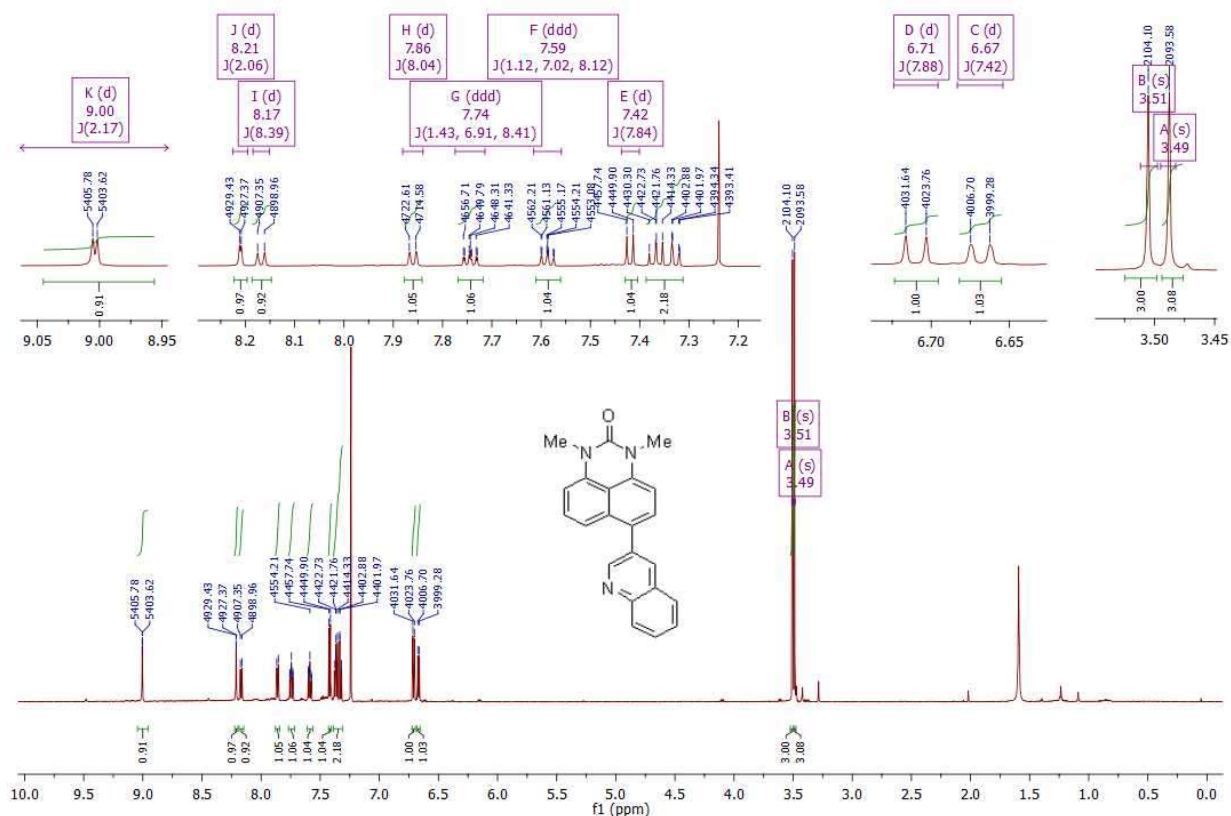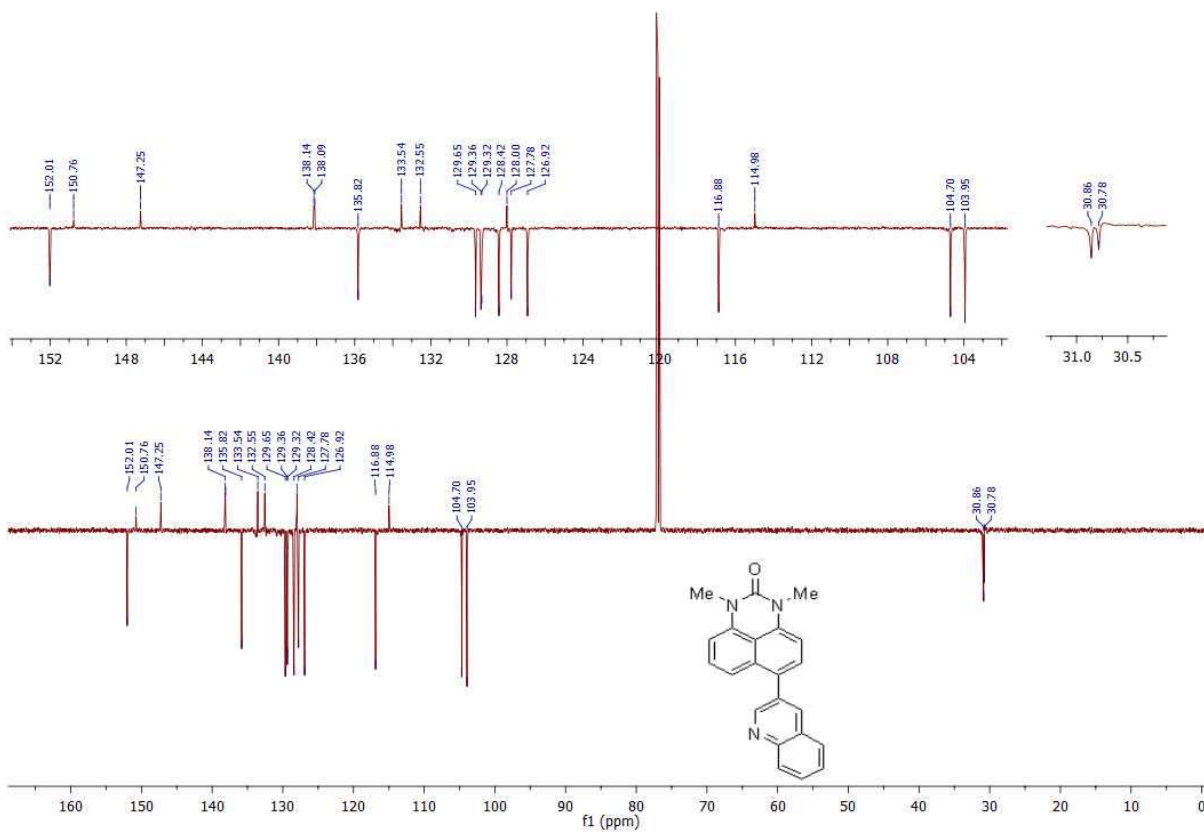

**Fig. S16.**  $^{13}\text{C}\{^1\text{H}\}$  APT-NMR spectrum of compound **6h** (150 MHz,  $\text{CDCl}_3$ ).

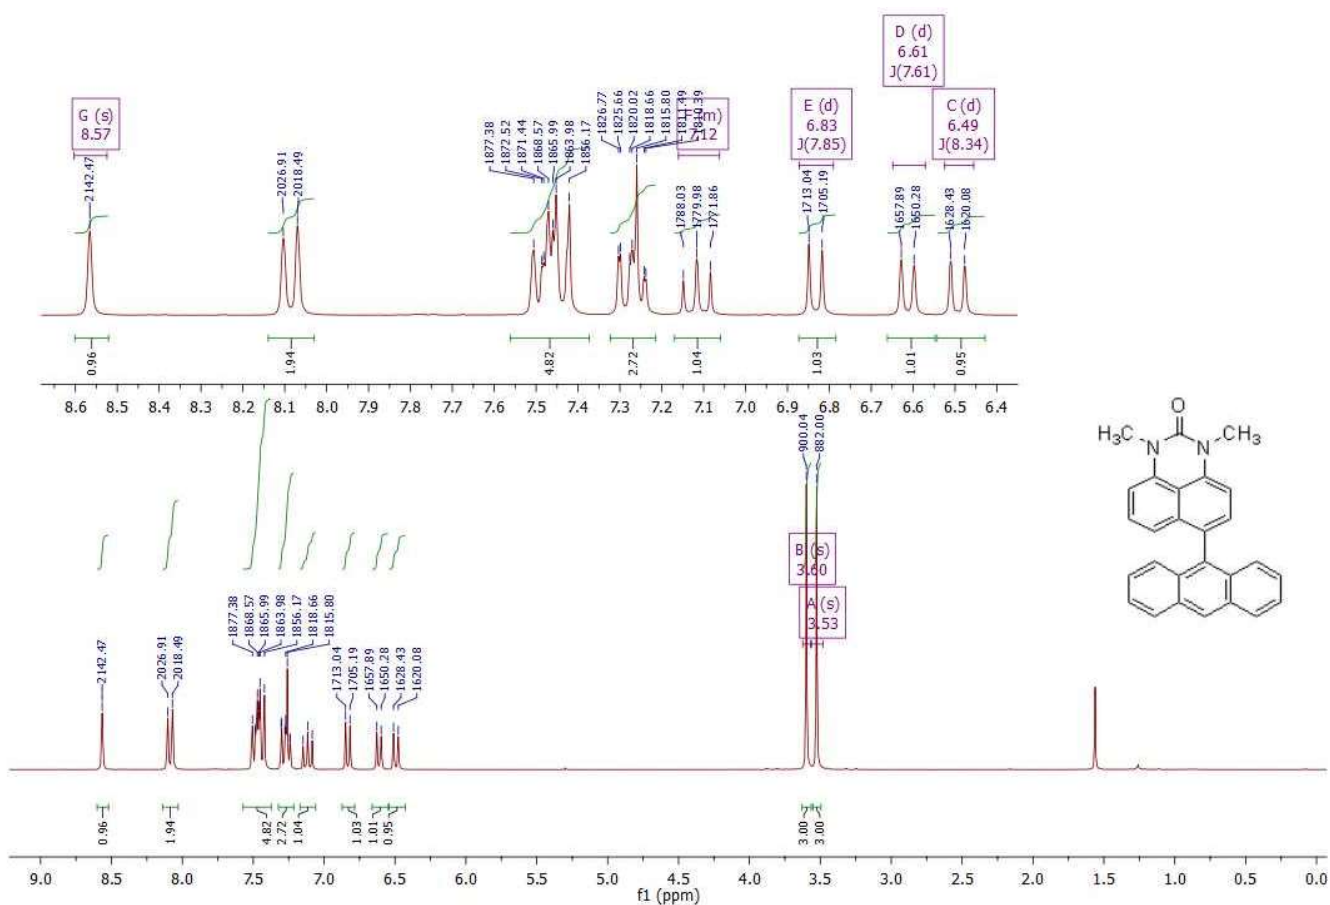

**Fig. S17.**  $^1\text{H}$  NMR spectrum of compound **6i** (250 MHz,  $\text{CDCl}_3$ ).

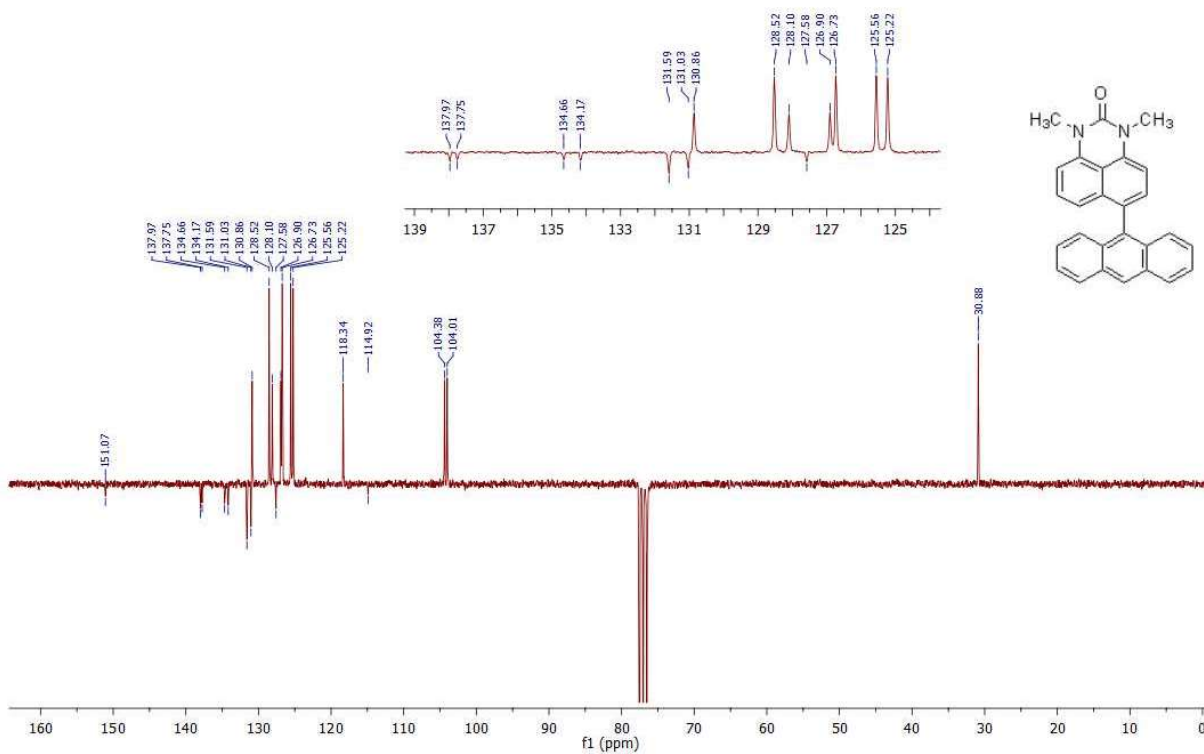

**Fig. S18.**  $^{13}\text{C}\{^1\text{H}\}$  APT-NMR spectrum of compound **6i** (62.9 MHz,  $\text{CDCl}_3$ ).



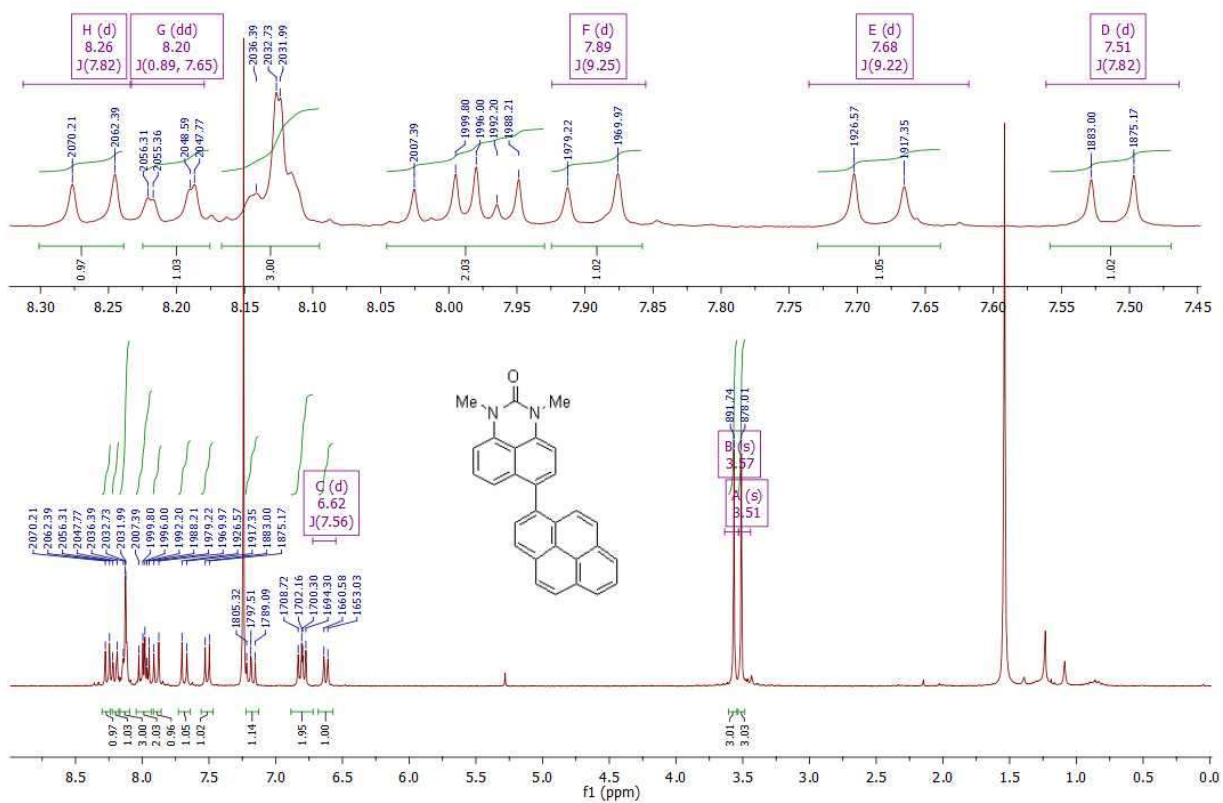

Fig. S19.  $^1\text{H}$  NMR spectrum of compound **6j** (250 MHz,  $\text{CDCl}_3$ ).

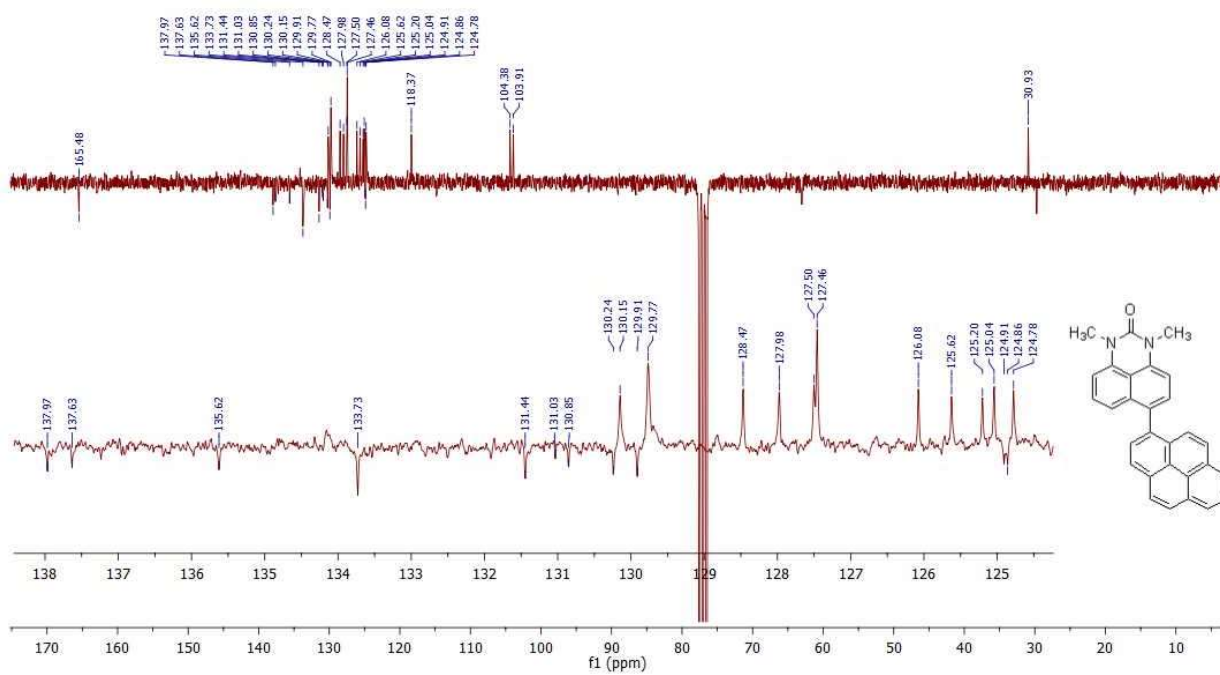

Fig. S20.  $^{13}\text{C}\{^1\text{H}\}$  APT-NMR spectrum of compound **6j** (62.9 MHz,  $\text{CDCl}_3$ ).

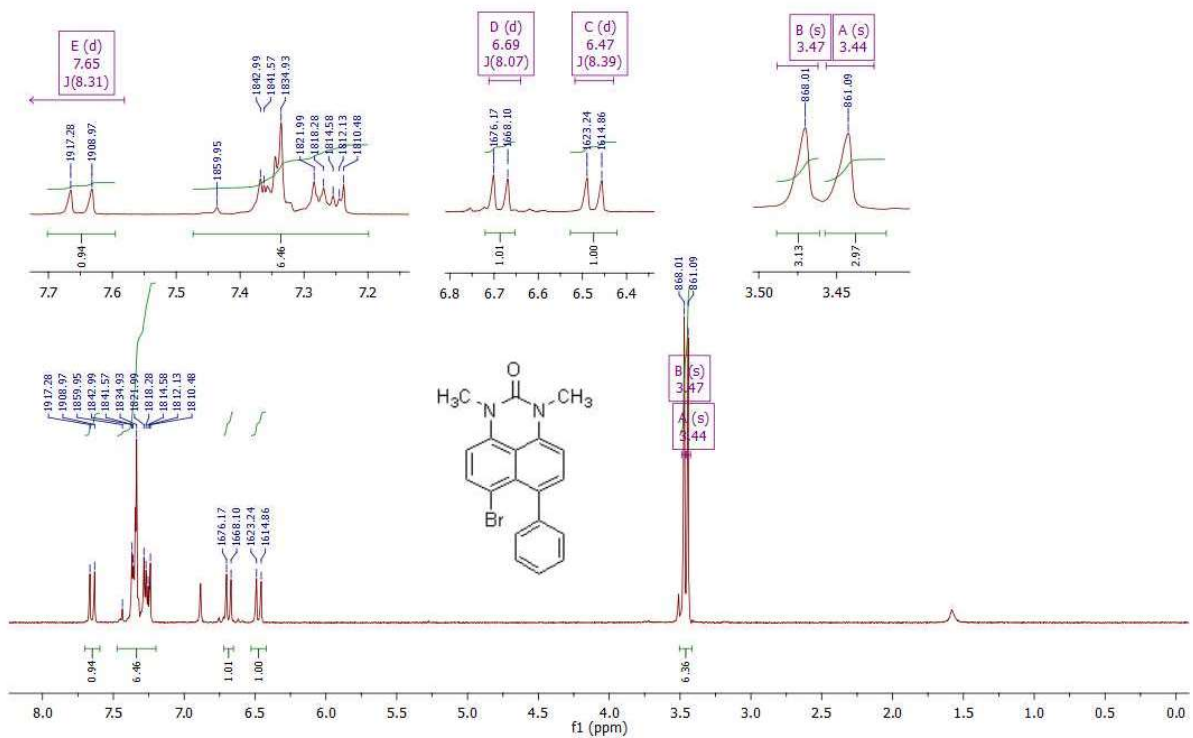

**Fig. S21.**  $^1\text{H}$  NMR spectrum of compound **8a** (250 MHz,  $\text{CDCl}_3$ ).

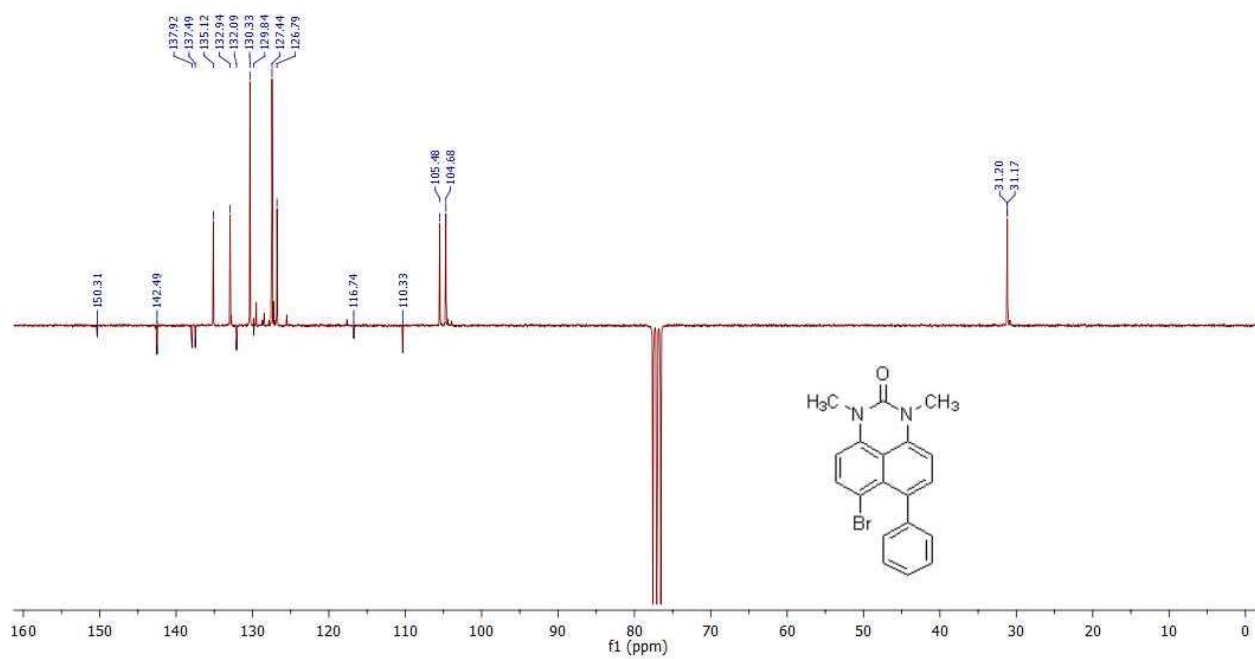

**Fig. S22.**  $^{13}\text{C}\{^1\text{H}\}$  APT-NMR spectrum of compound **8a** (62.9 MHz,  $\text{CDCl}_3$ ).

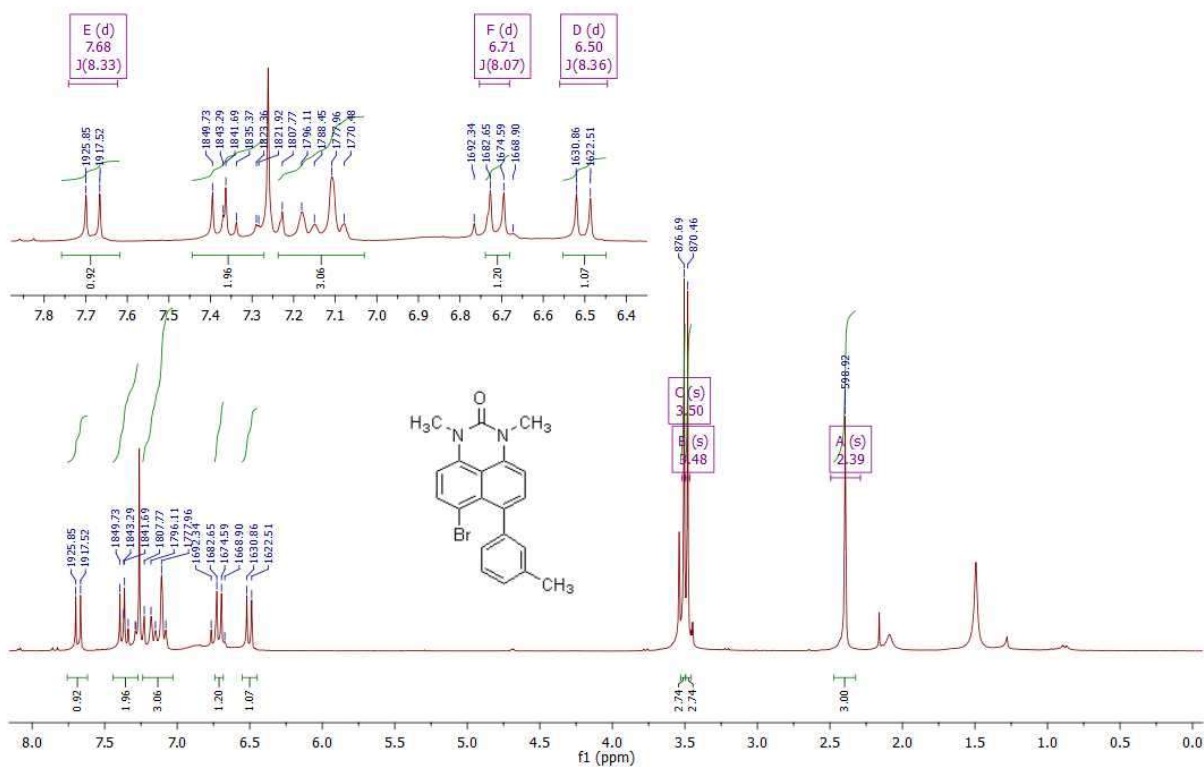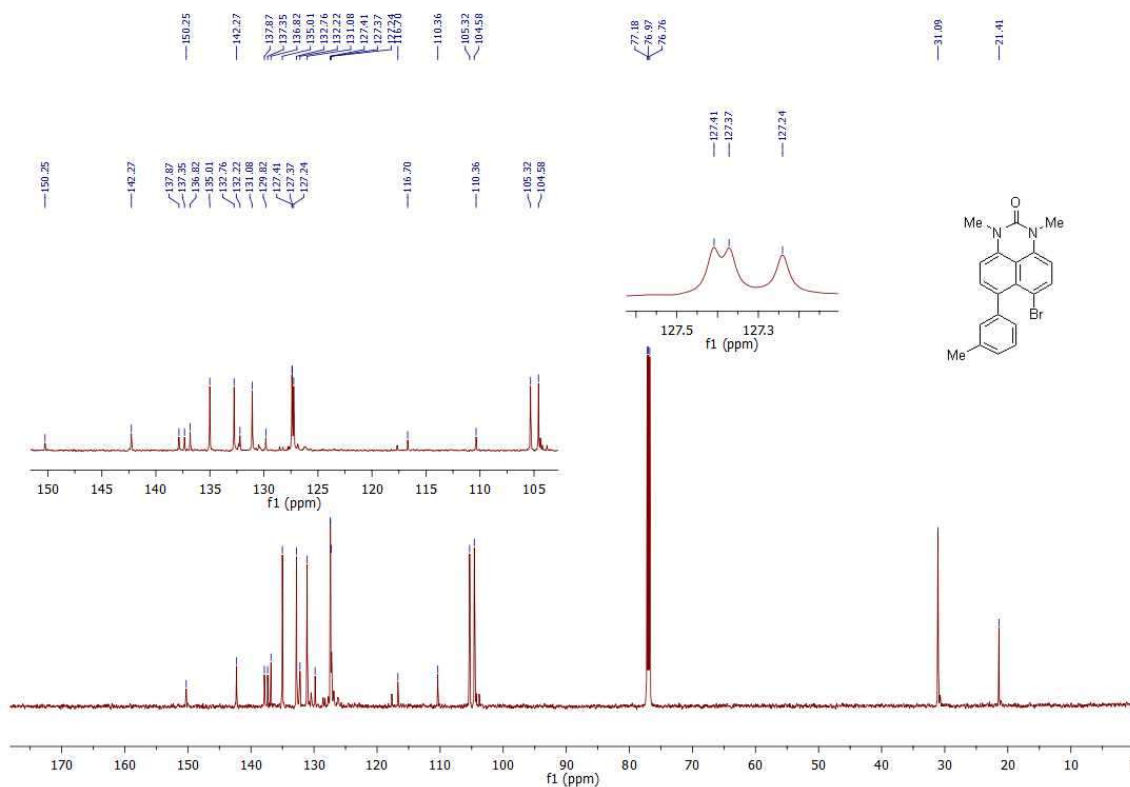

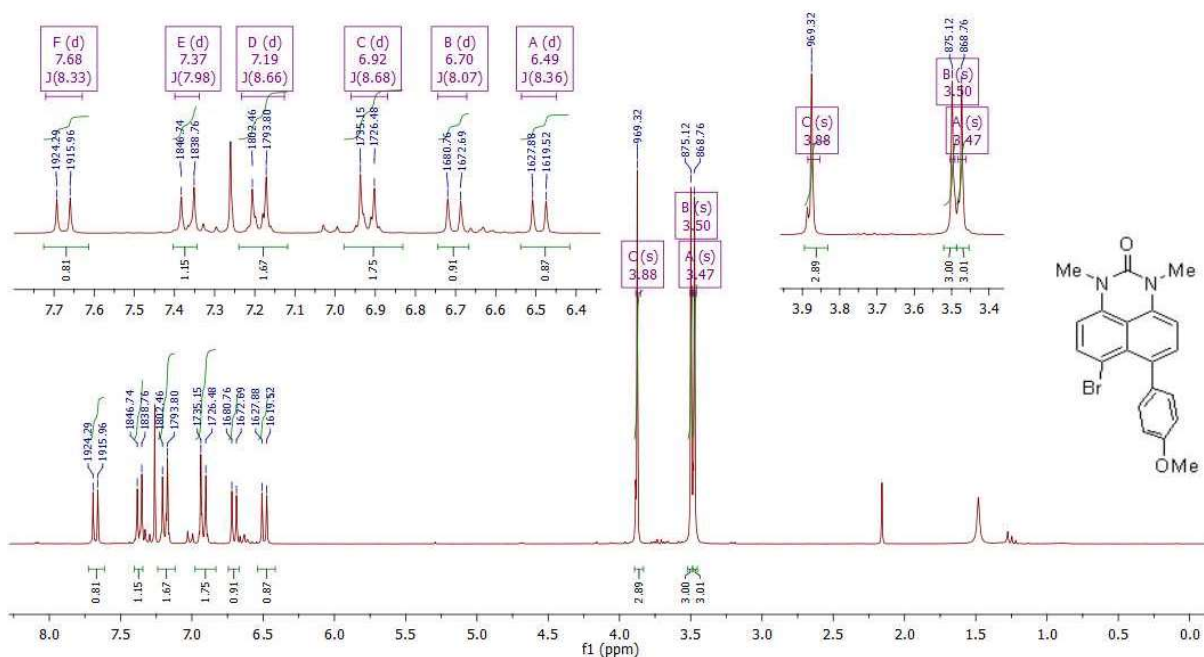

**Fig. S25.**  $^1\text{H}$  NMR spectrum of compound **8c** (250 MHz,  $\text{CDCl}_3$ ).

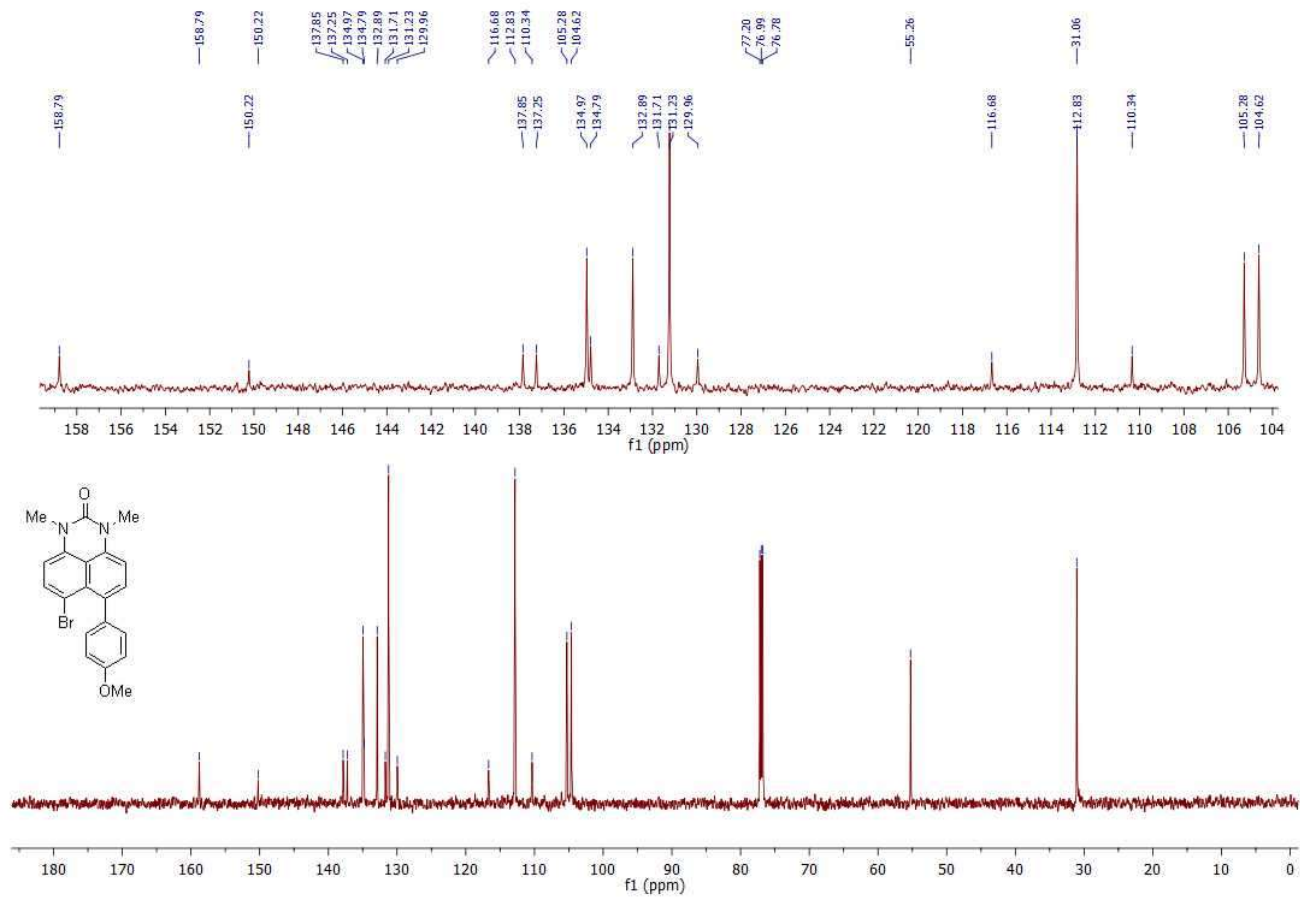

**Fig. S26.**  $^{13}\text{C}\{^1\text{H}\}$  NMR spectrum of compound **8c** (150 MHz,  $\text{CDCl}_3$ ).

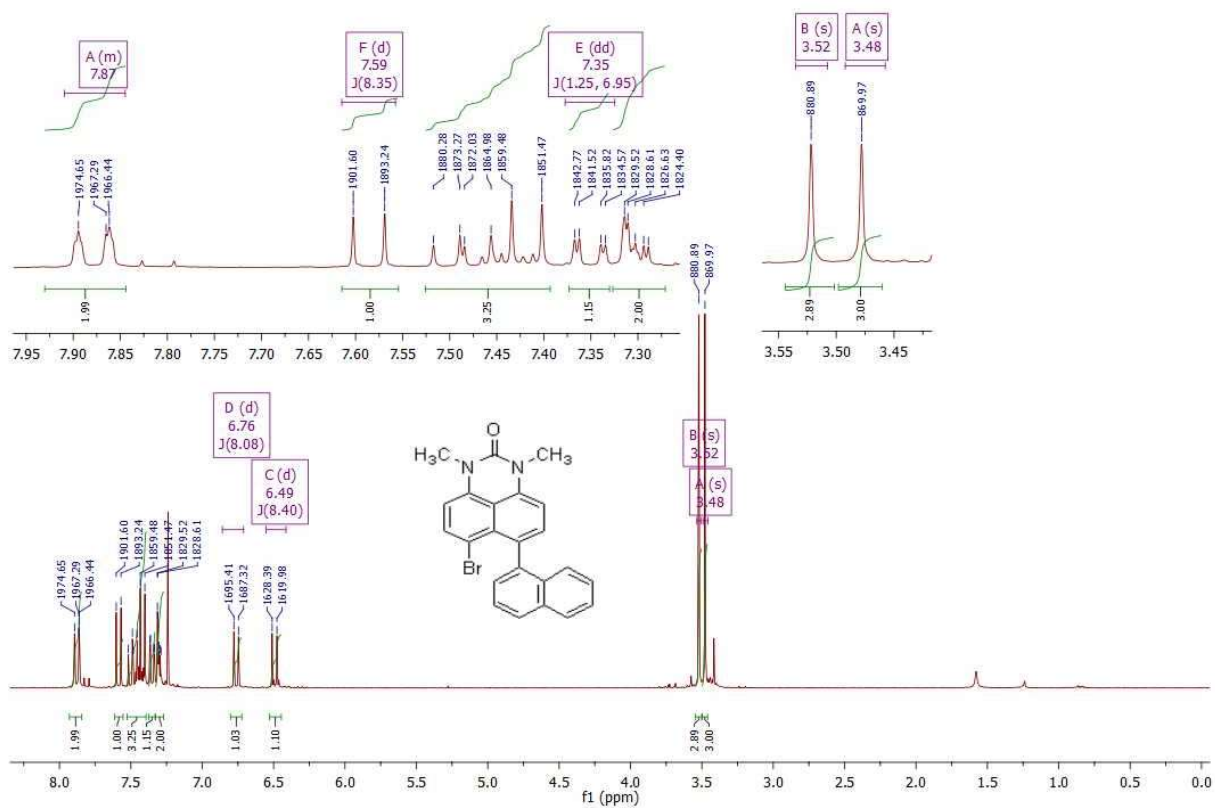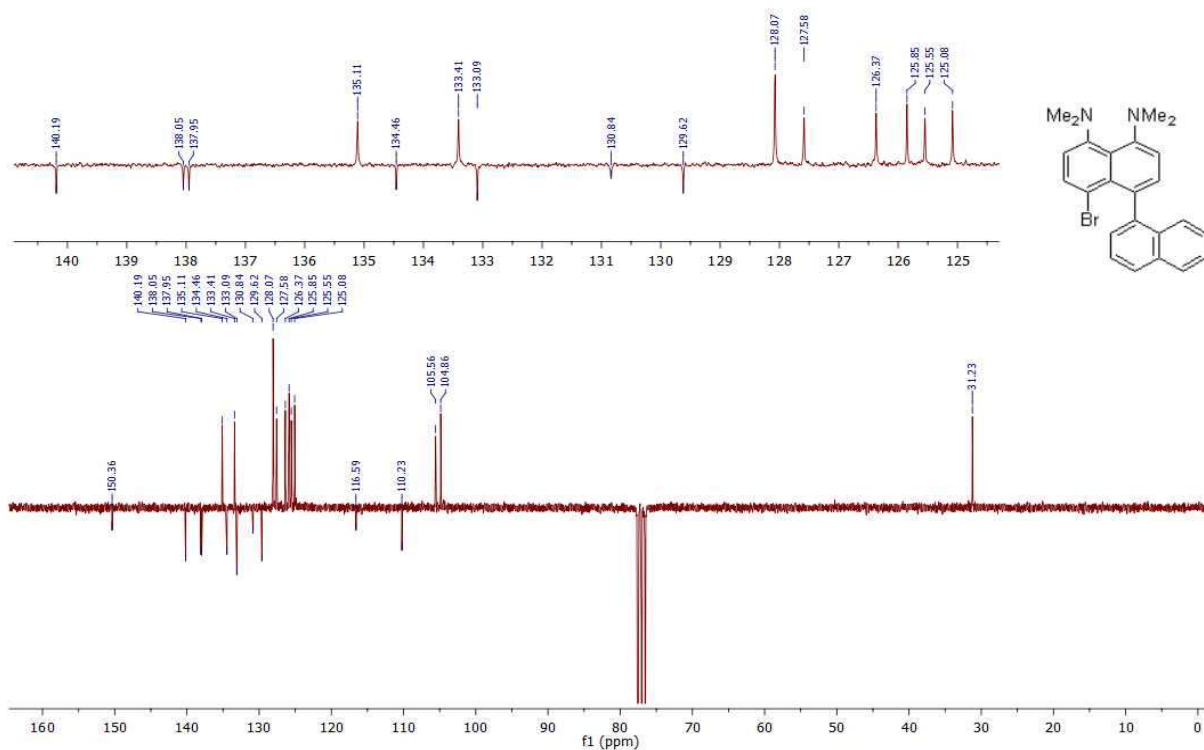



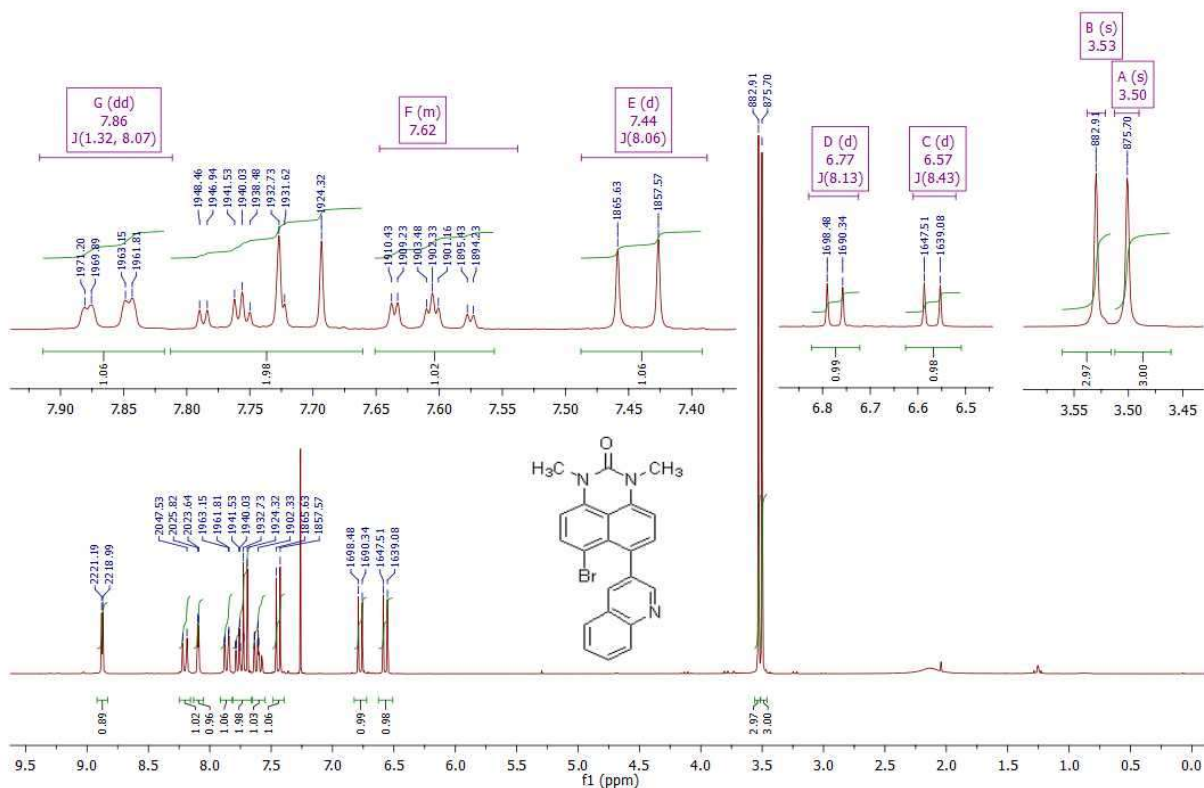

**Fig. S29.**  $^1\text{H}$  NMR spectrum of compound **8e** (250 MHz,  $\text{CDCl}_3$ ).

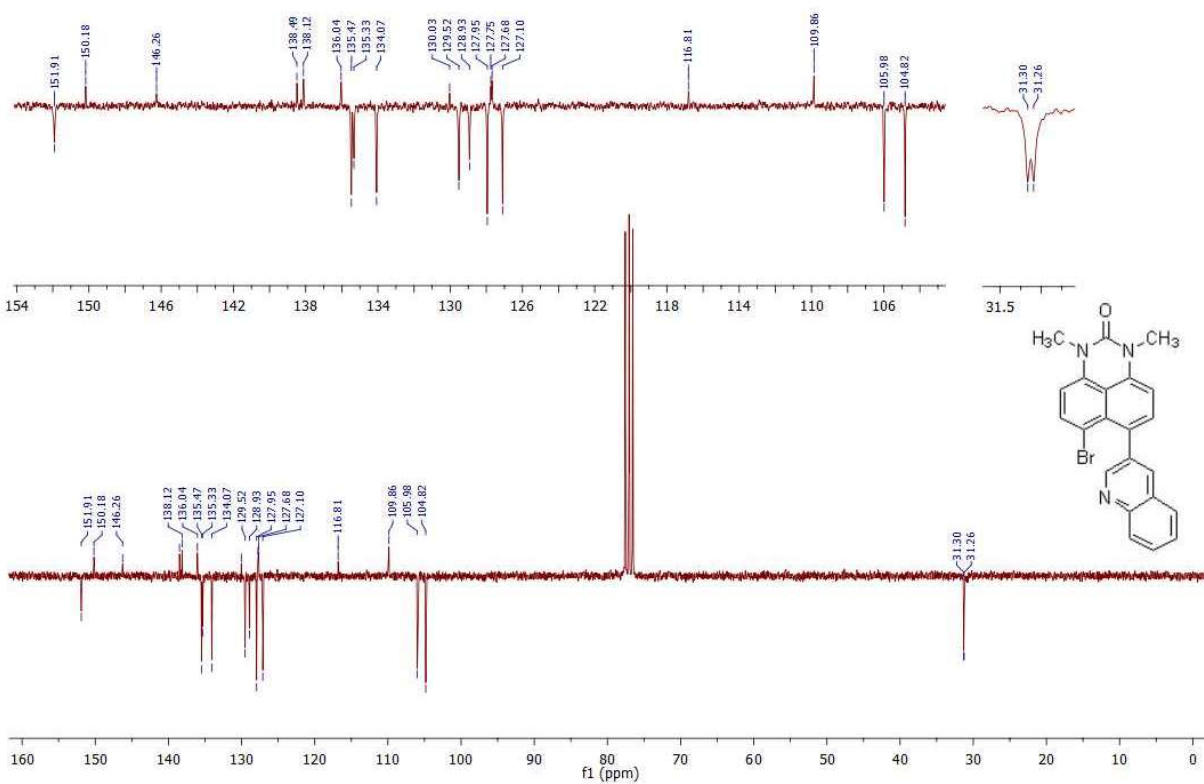

**Fig. 30.**  $^{13}\text{C}\{^1\text{H}\}$  APT-NMR spectrum of compound **8e** (62.9 MHz,  $\text{CDCl}_3$ ).

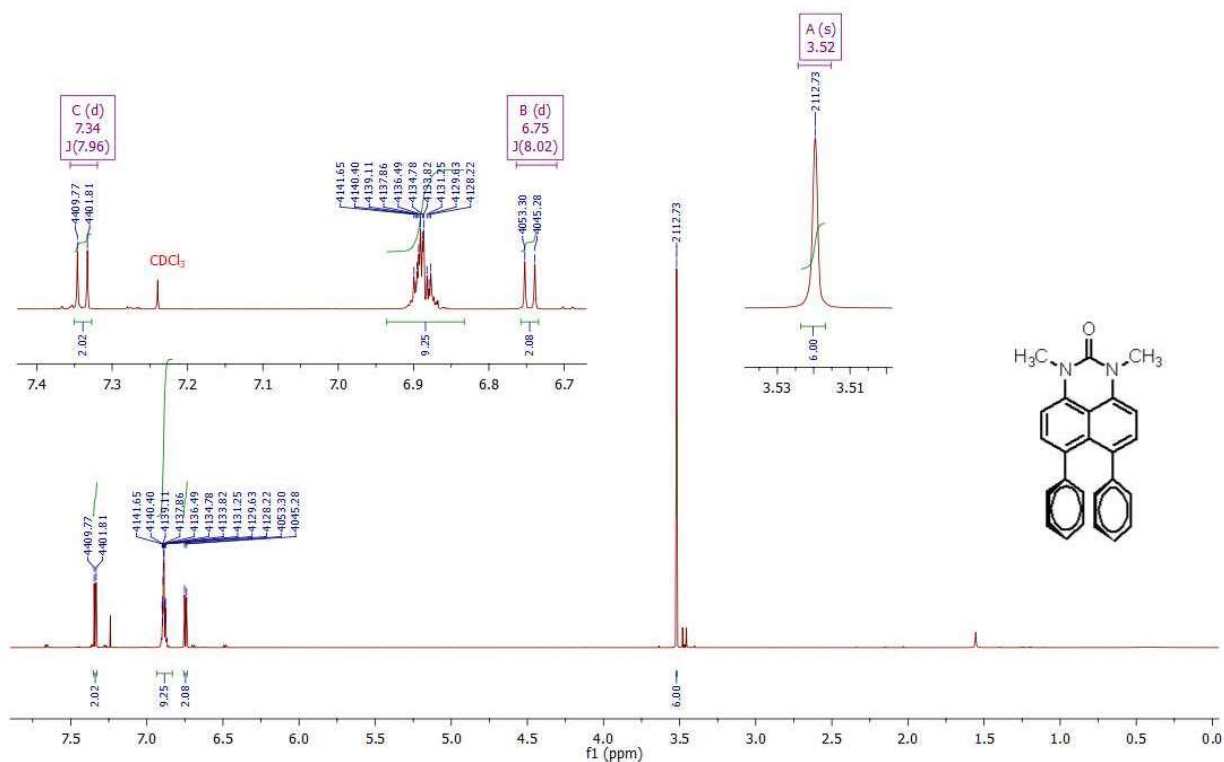

**Fig. S31.**  $^1\text{H}$  NMR spectrum of compound **3a** (600 MHz,  $\text{CDCl}_3$ ).

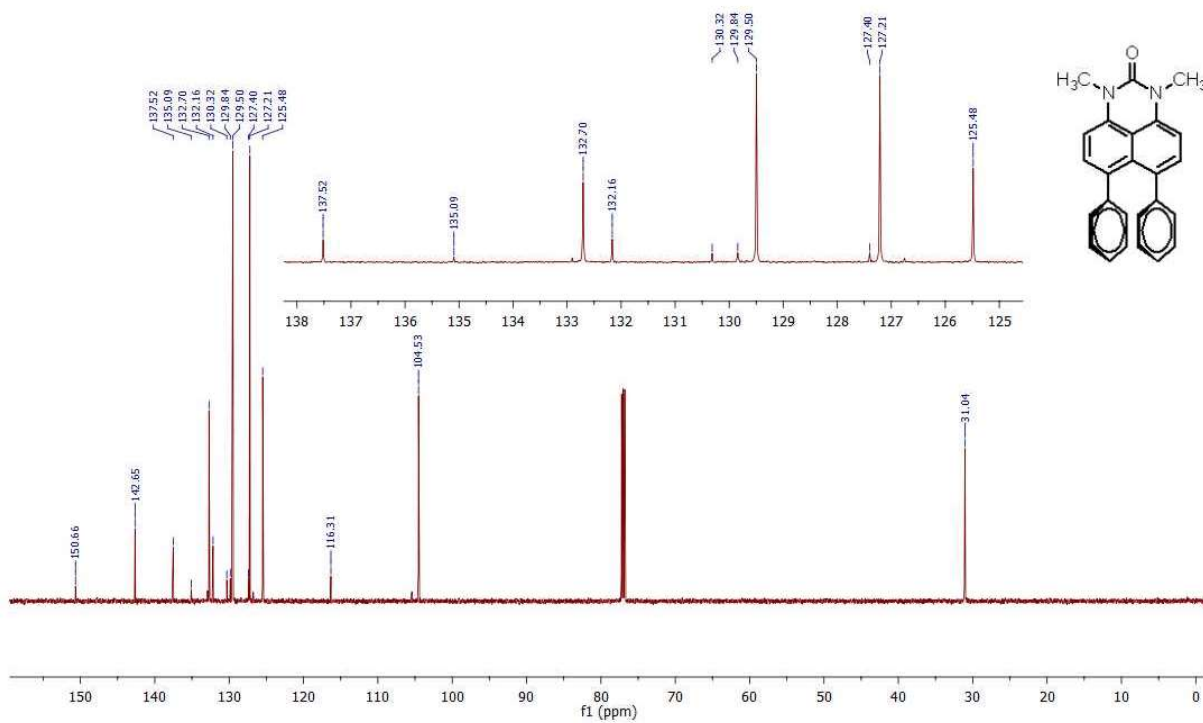

**Fig. S32.**  $^{13}\text{C}\{^1\text{H}\}$  NMR spectrum of compound **3a** (150 MHz,  $\text{CDCl}_3$ ).

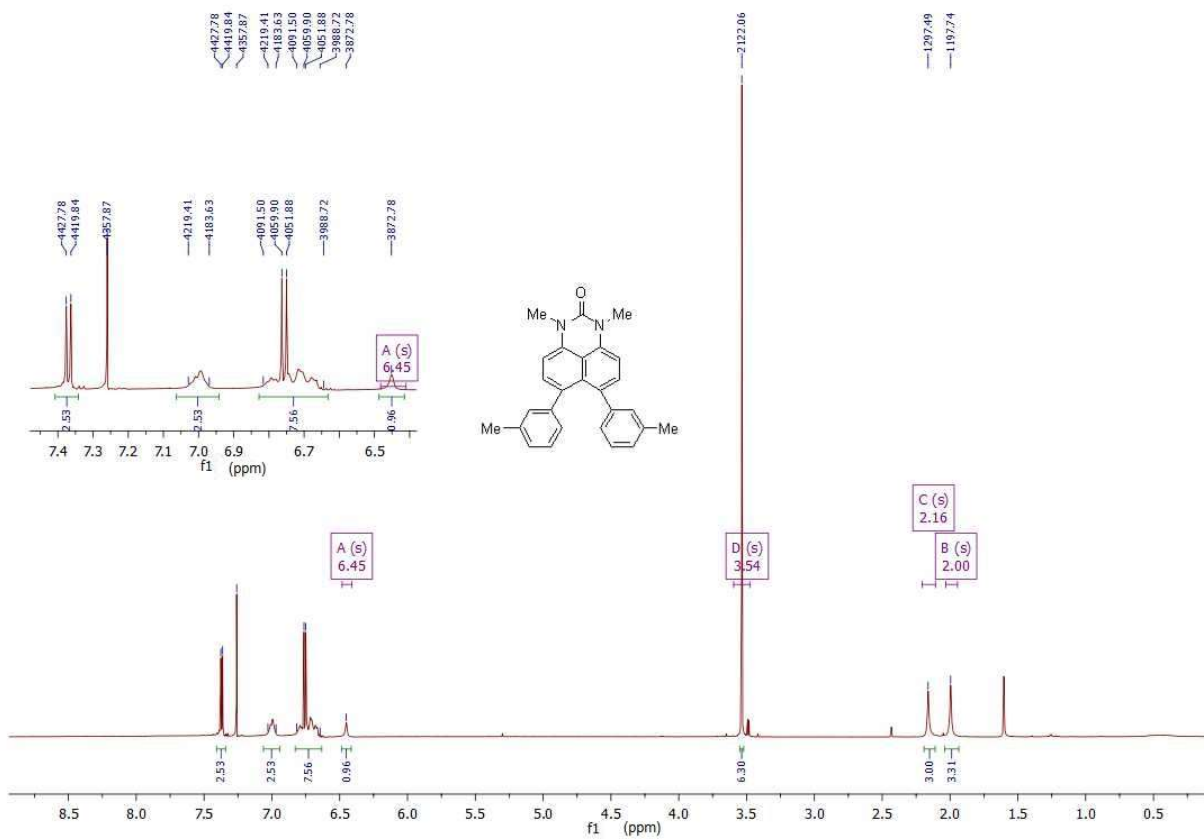

Fig. S33. <sup>1</sup>H NMR spectrum of compound **3b** (600 MHz, CDCl<sub>3</sub>, +20 °C).

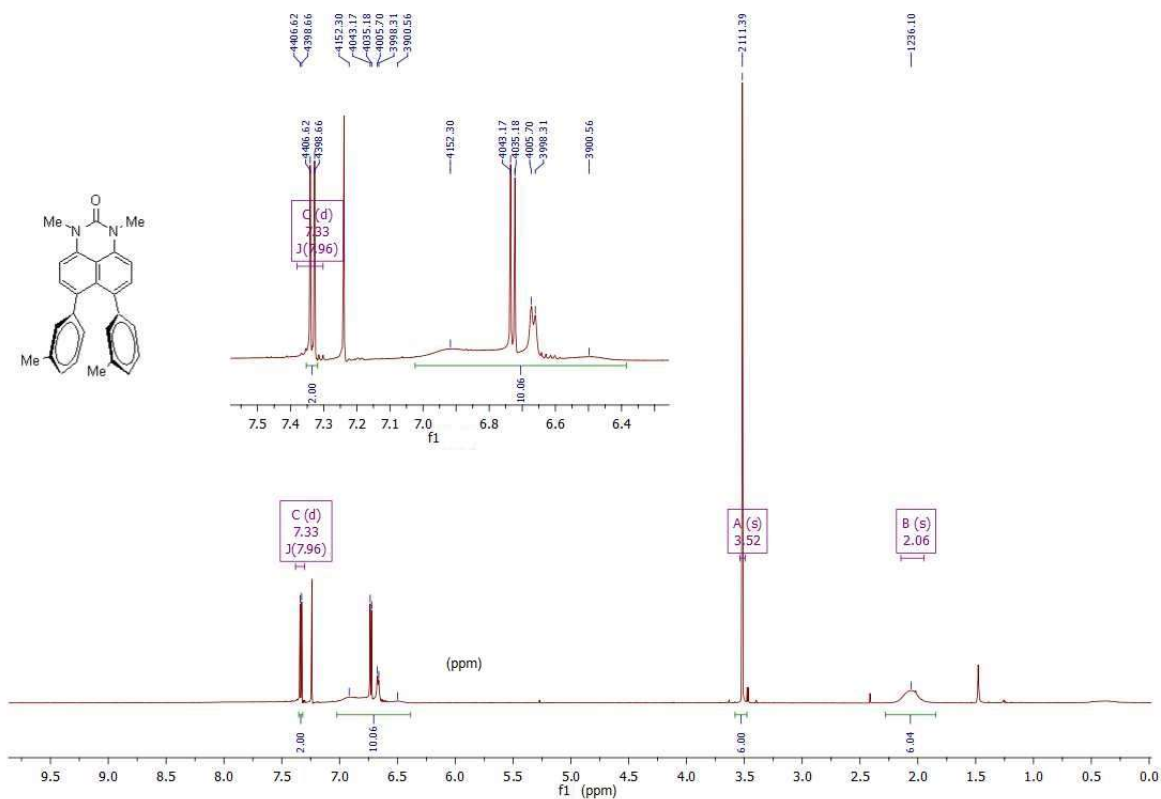

Fig. S34. <sup>1</sup>H NMR spectrum of compound **3b** (600 MHz, CDCl<sub>3</sub>, +55 °C).



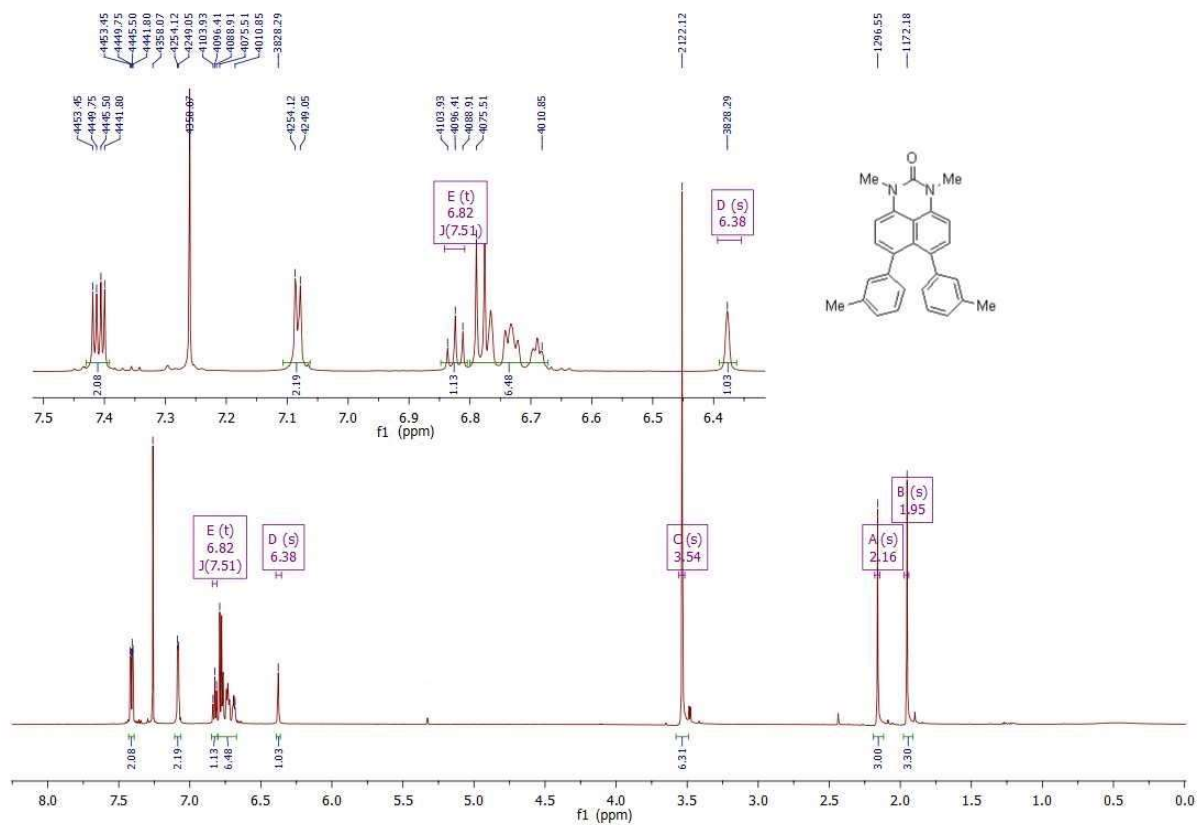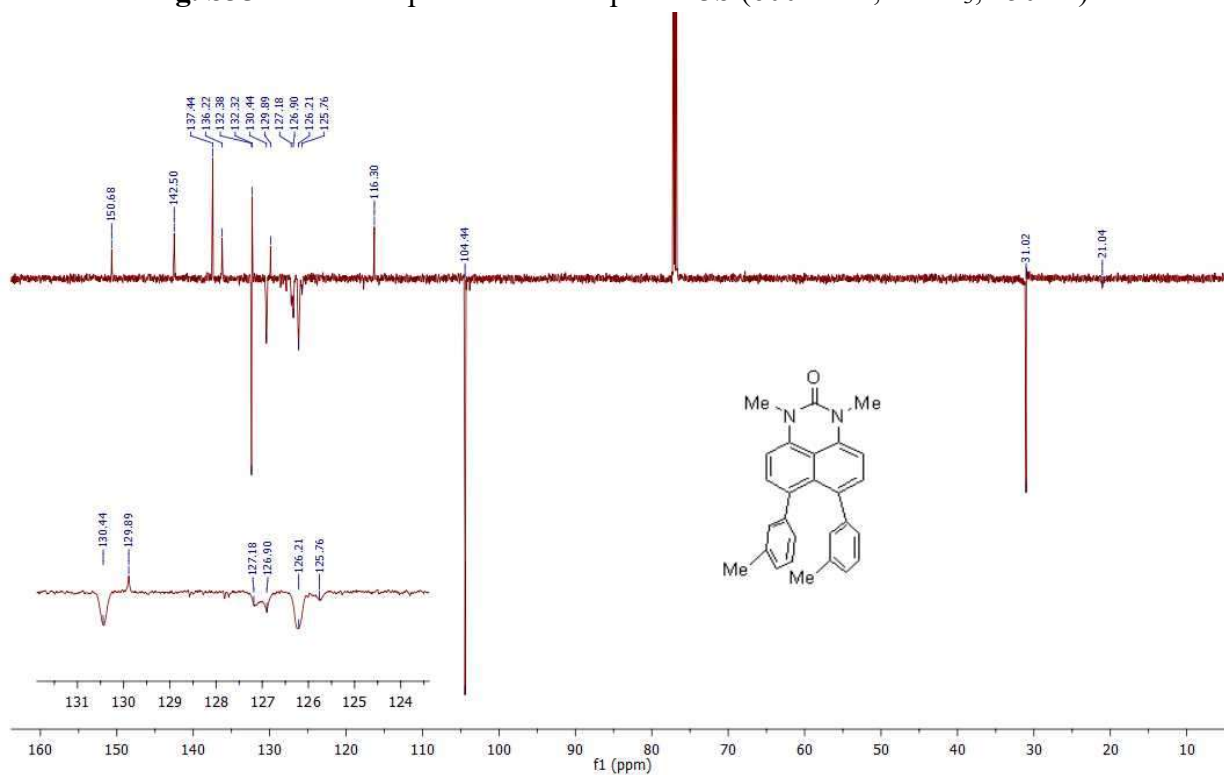

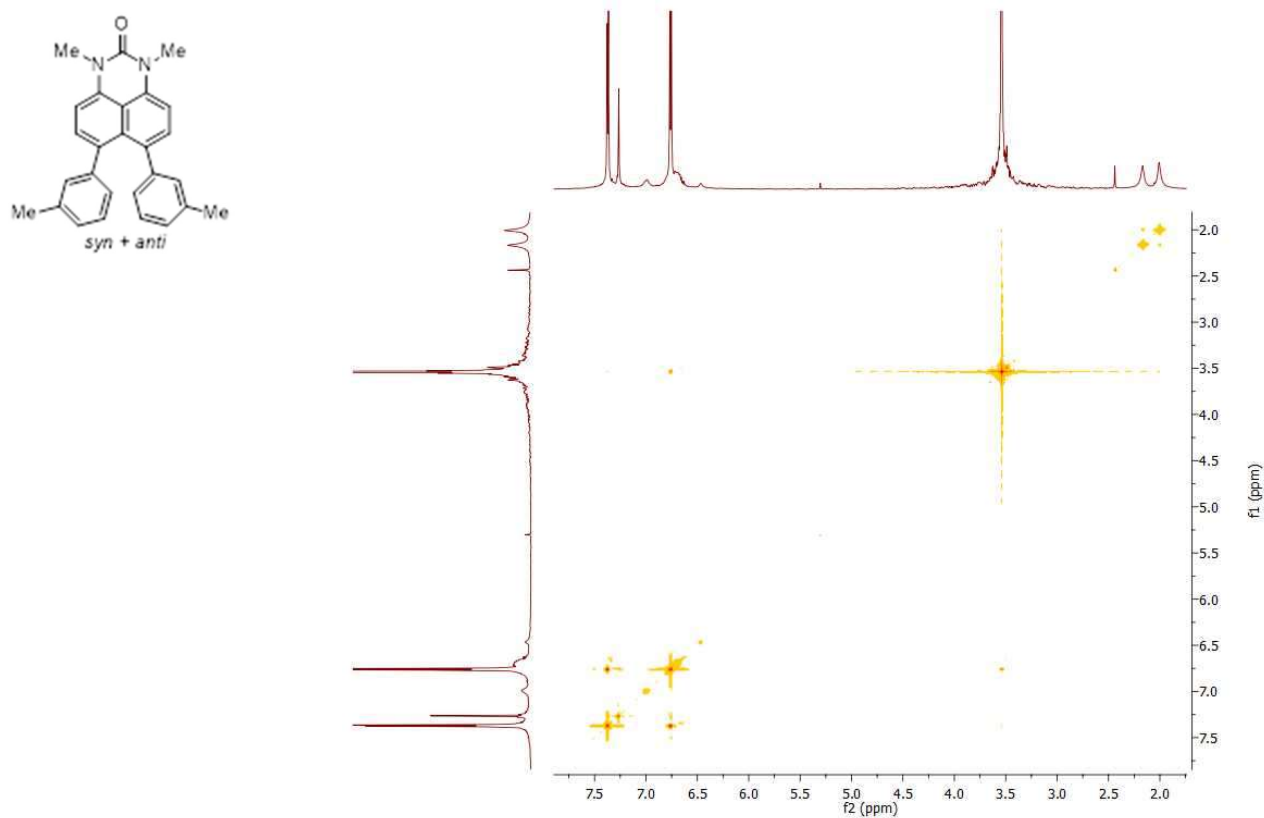

**Fig. S37.**  $^1\text{H}$ - $^1\text{H}$  COSY spectrum of compound **3b** (600 MHz,  $\text{CDCl}_3$ , +30 °C).

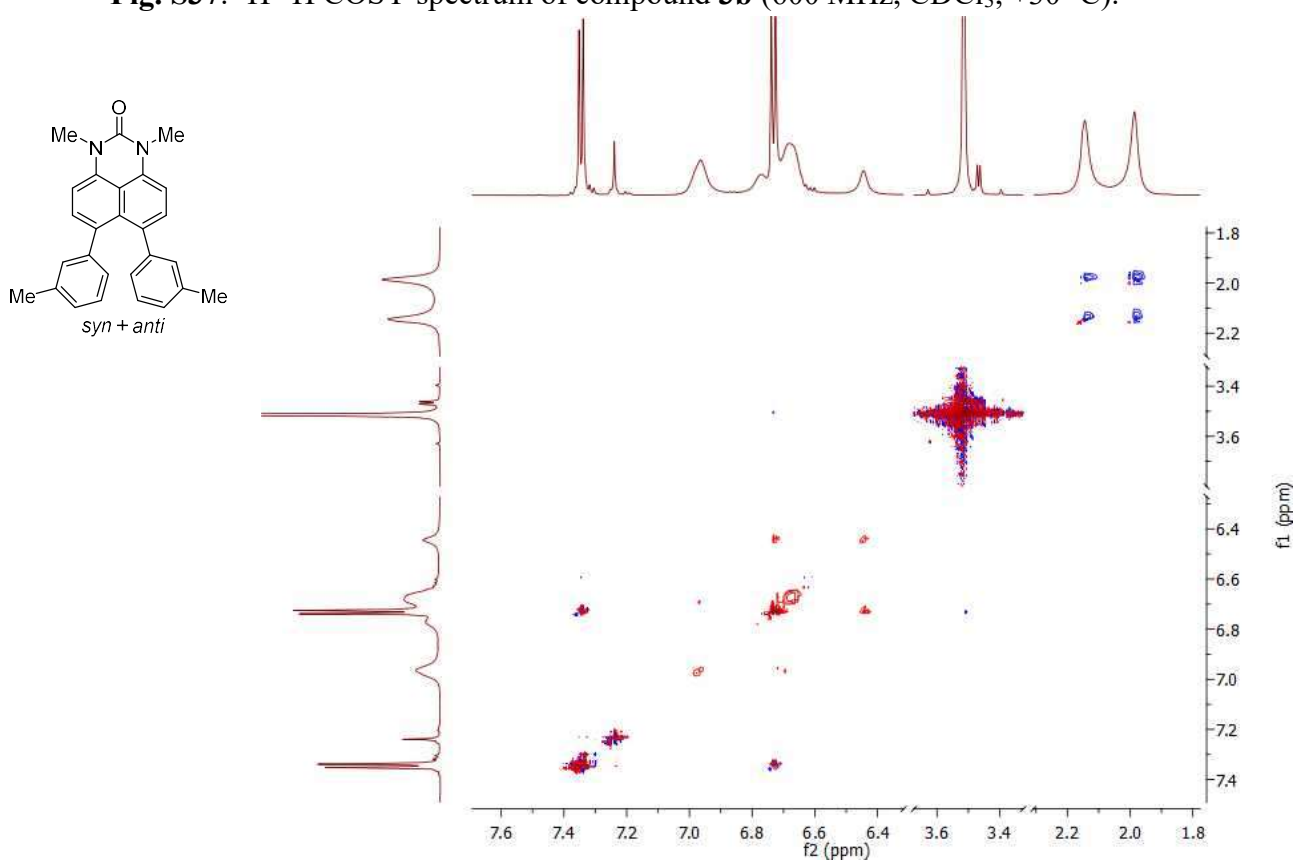

**Fig. S38.** 2D NOESY spectrum of compound **3b** (600 MHz,  $\text{CDCl}_3$ , +30 °C).

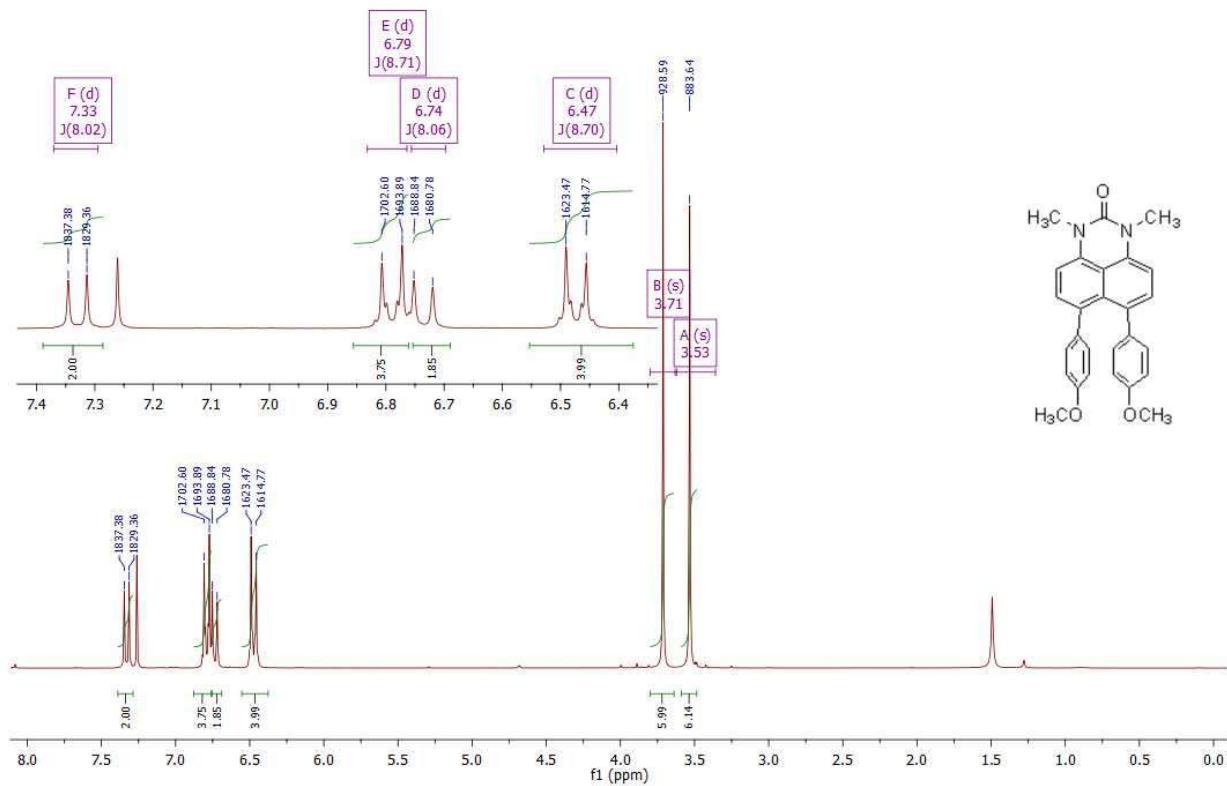

**Fig. S39.**  $^1\text{H}$  NMR spectrum of compound **3c** (250 MHz,  $\text{CDCl}_3$ ).

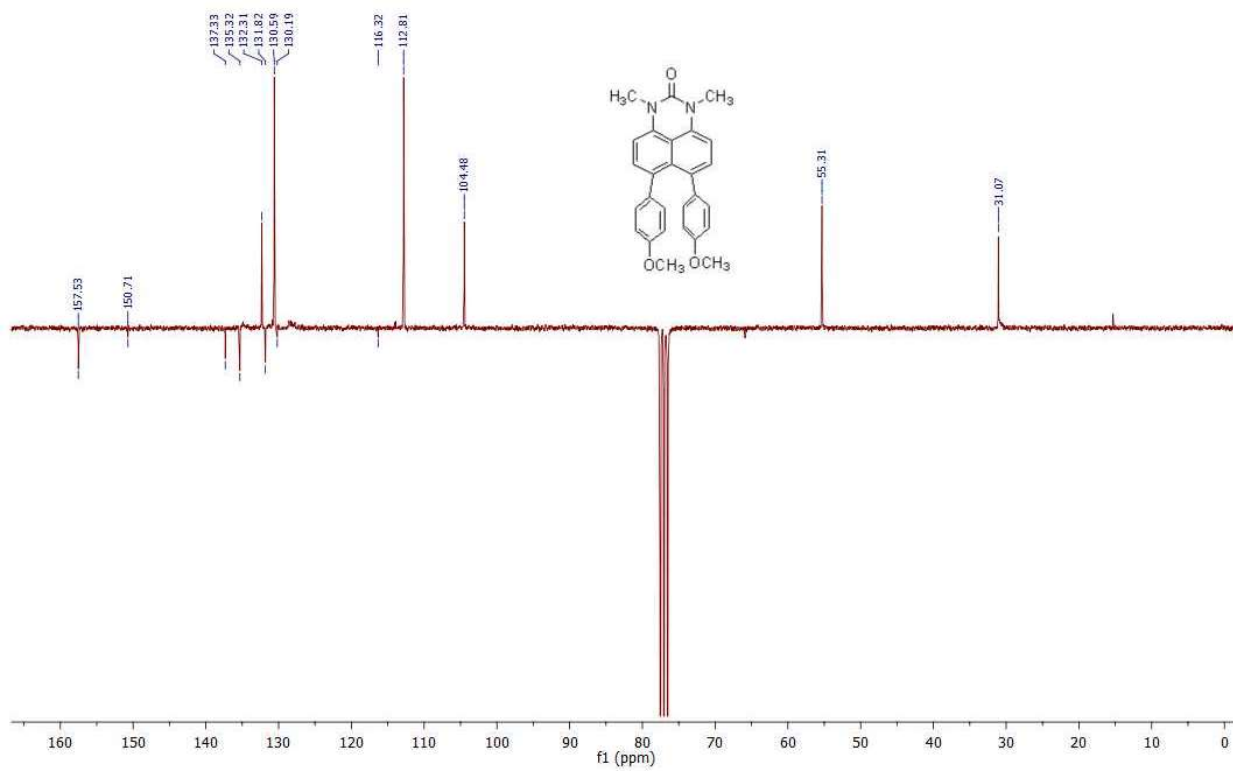

**Fig. S40.**  $^{13}\text{C}\{^1\text{H}\}$  APT-NMR spectrum of compound **3c** (62.9 MHz,  $\text{CDCl}_3$ ).

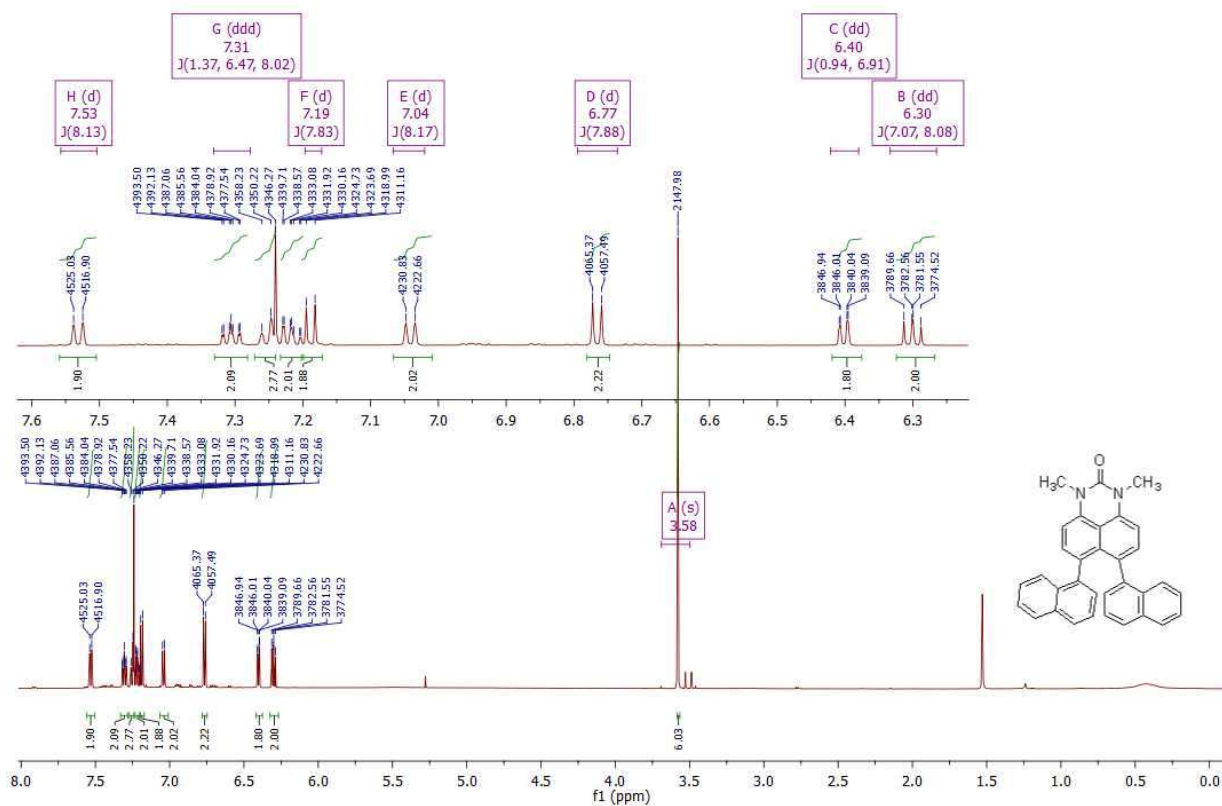

Fig. S41.  $^1\text{H}$  NMR spectrum of compound **3d** (600 MHz,  $\text{CDCl}_3$ ,  $+30\text{ }^\circ\text{C}$ ).

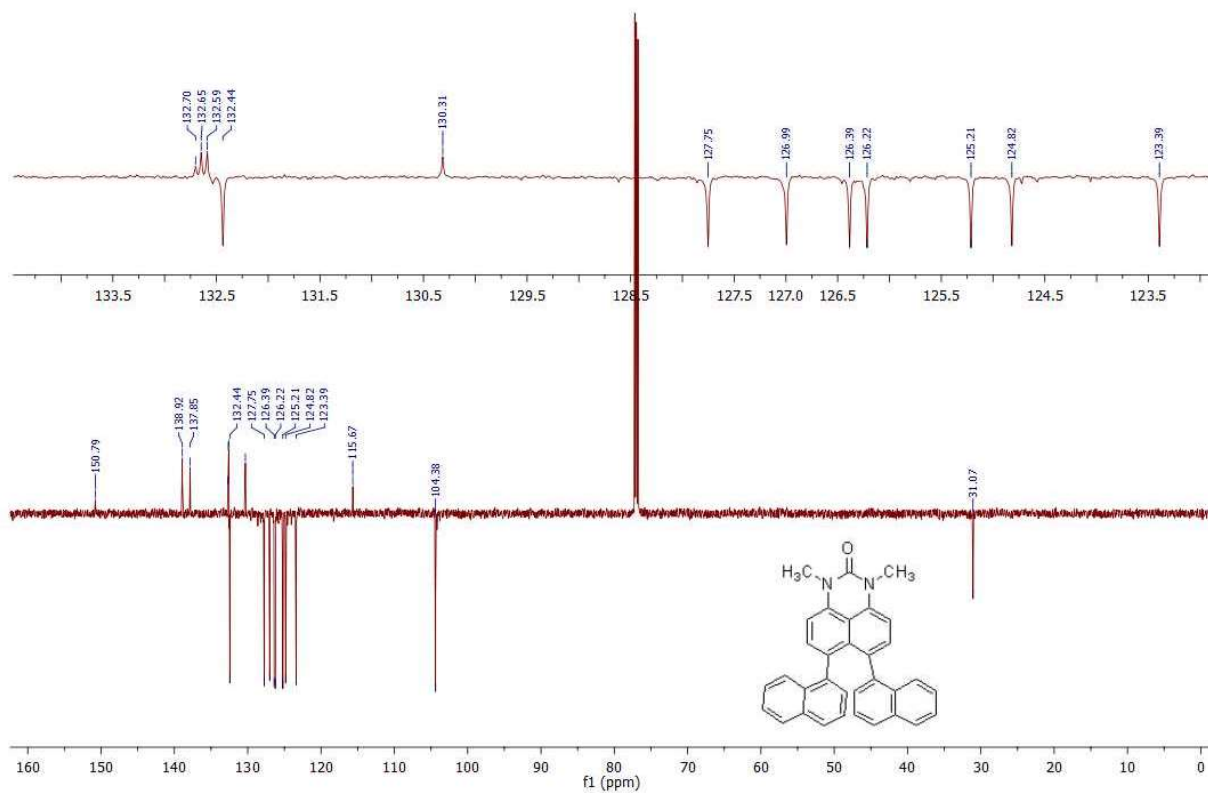

Fig. S42.  $^{13}\text{C}\{^1\text{H}\}$  APT-NMR spectrum of compound **3d** (150 MHz,  $\text{CDCl}_3$ ).

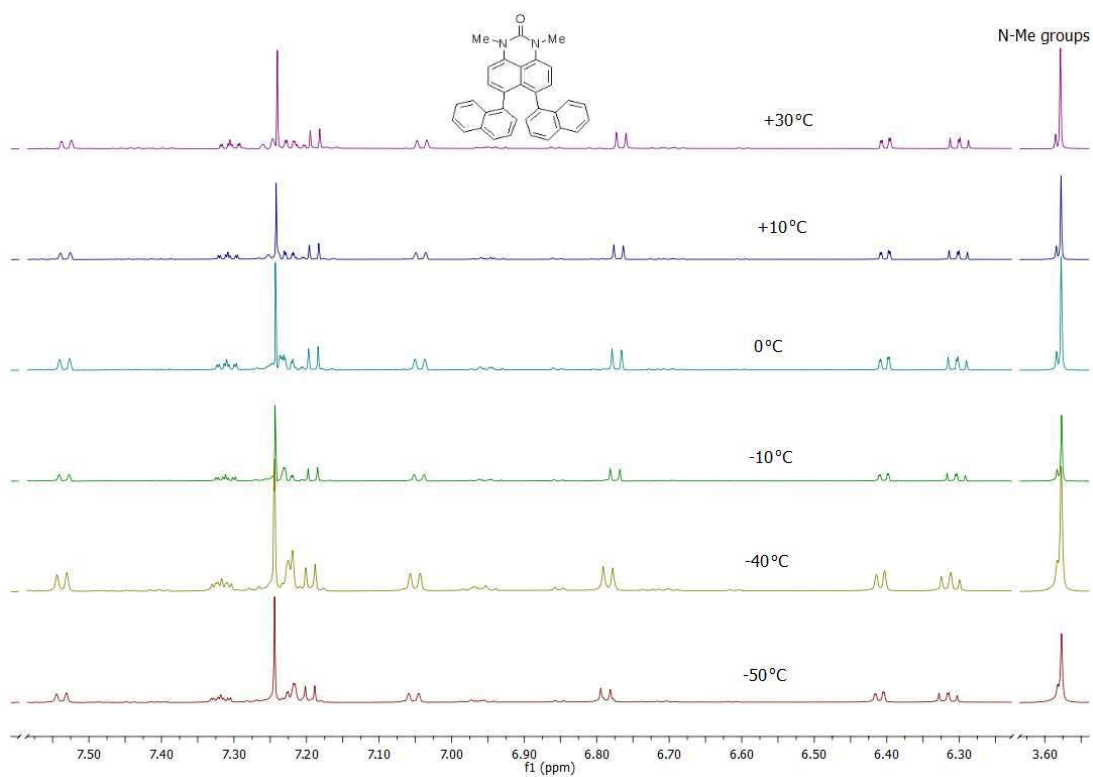

**Fig. S43.** Variable-temperature  $^1\text{H}$  NMR spectra of **3d** ( $\text{CDCl}_3$ , 600MHz).

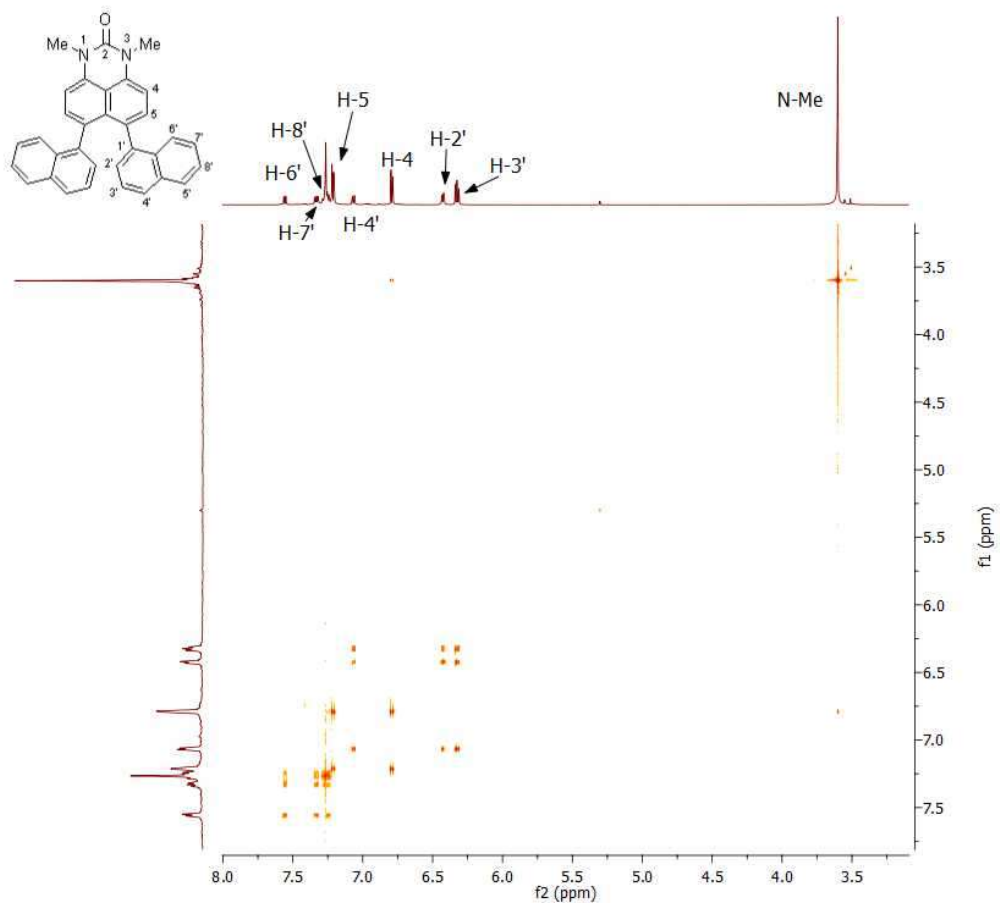

**Fig. S44.**  $^1\text{H}$ - $^1\text{H}$  COSY spectra of **3d** ( $\text{CDCl}_3$ , 600MHz).

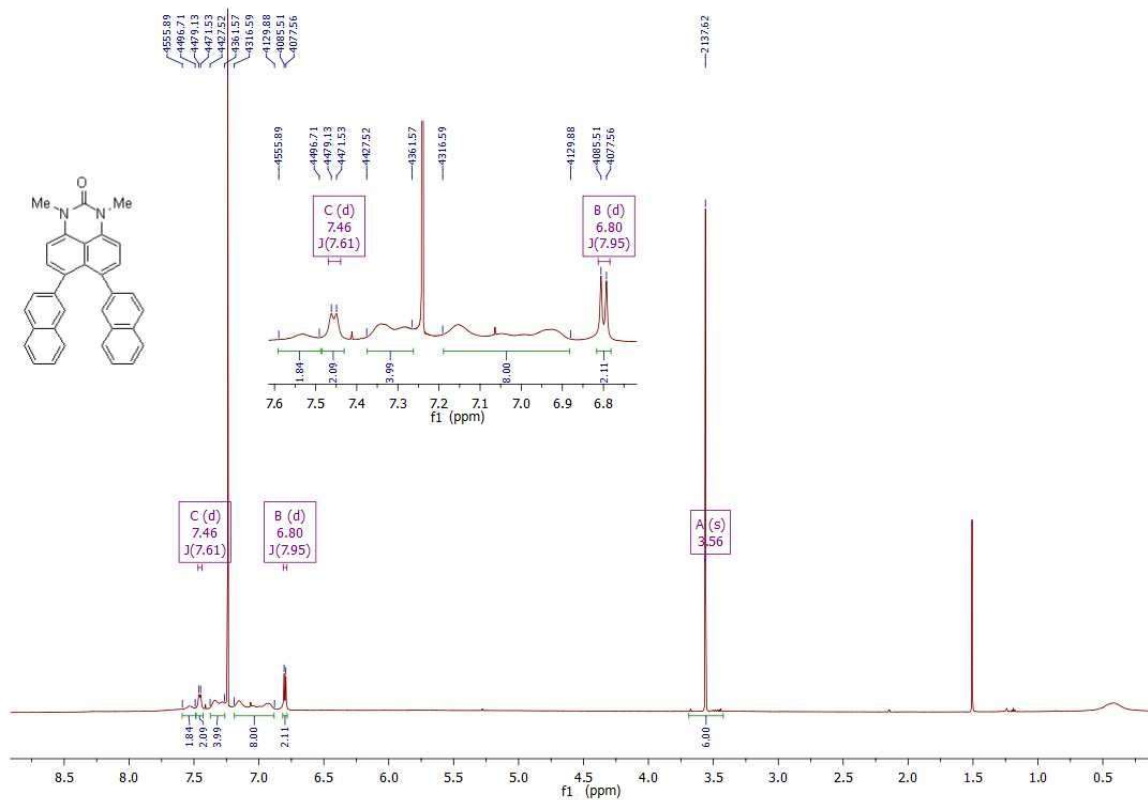

**Fig. S45.**  $^1\text{H}$  NMR spectrum of compound **3f** (600 MHz,  $\text{CDCl}_3$ ,  $+30\text{ }^\circ\text{C}$ ).

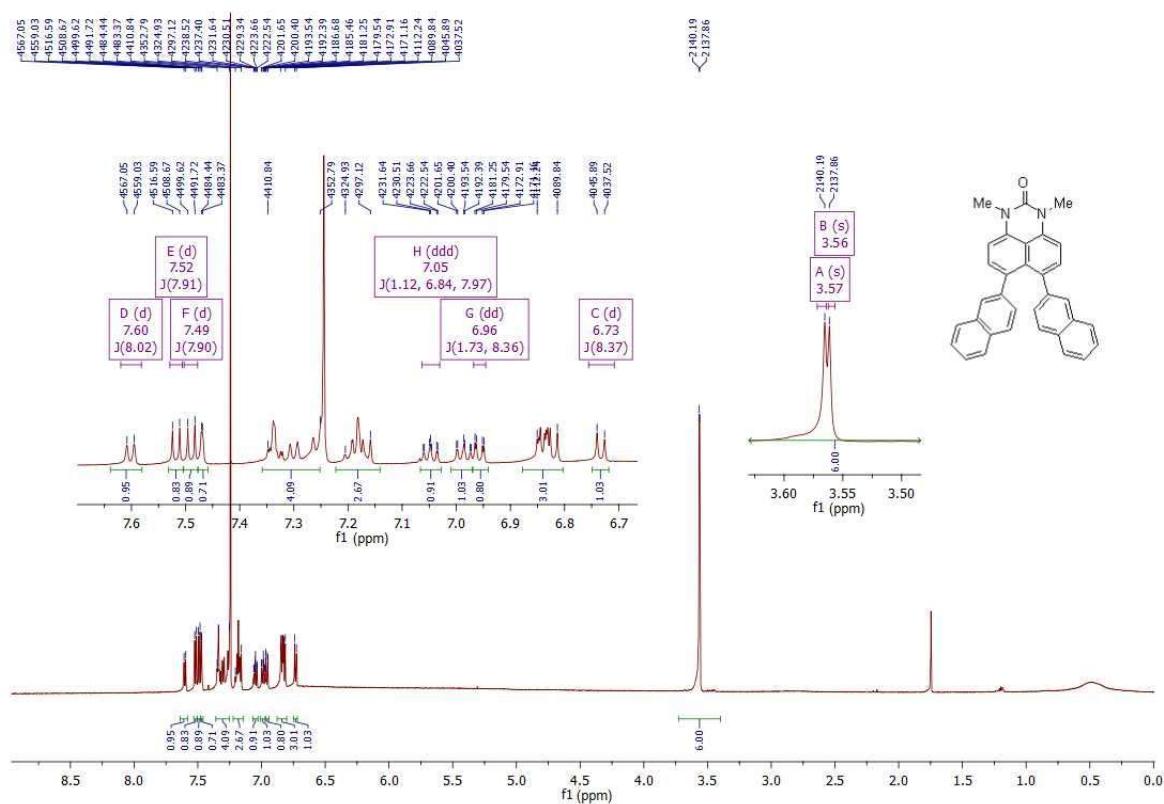

**Fig. S46.**  $^1\text{H}$  NMR spectrum of compound **3f** (600 MHz,  $\text{CDCl}_3$ ,  $-45\text{ }^\circ\text{C}$ ).



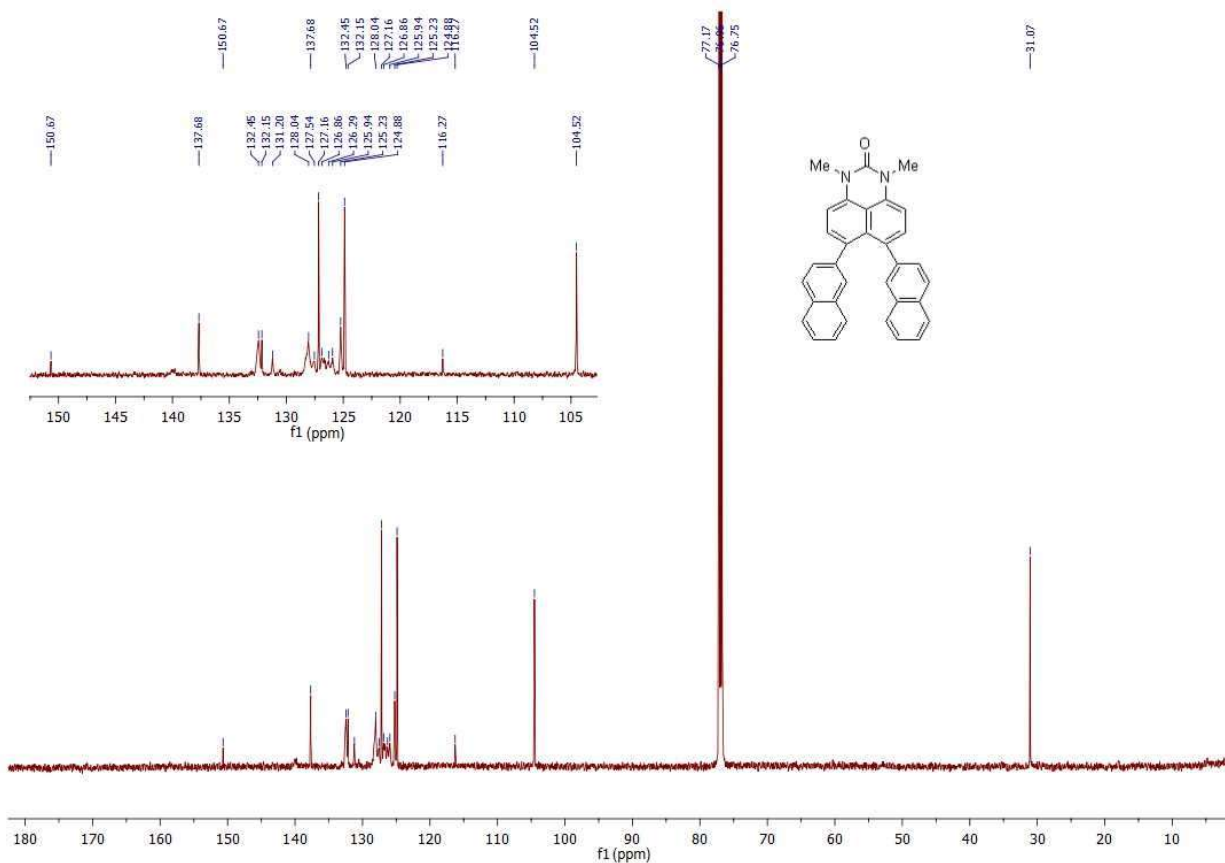

**Fig. S47.**  $^{13}\text{C}\{^1\text{H}\}$  APT-NMR spectrum of compound 3f (150 MHz,  $\text{CDCl}_3$ , +30 °C).

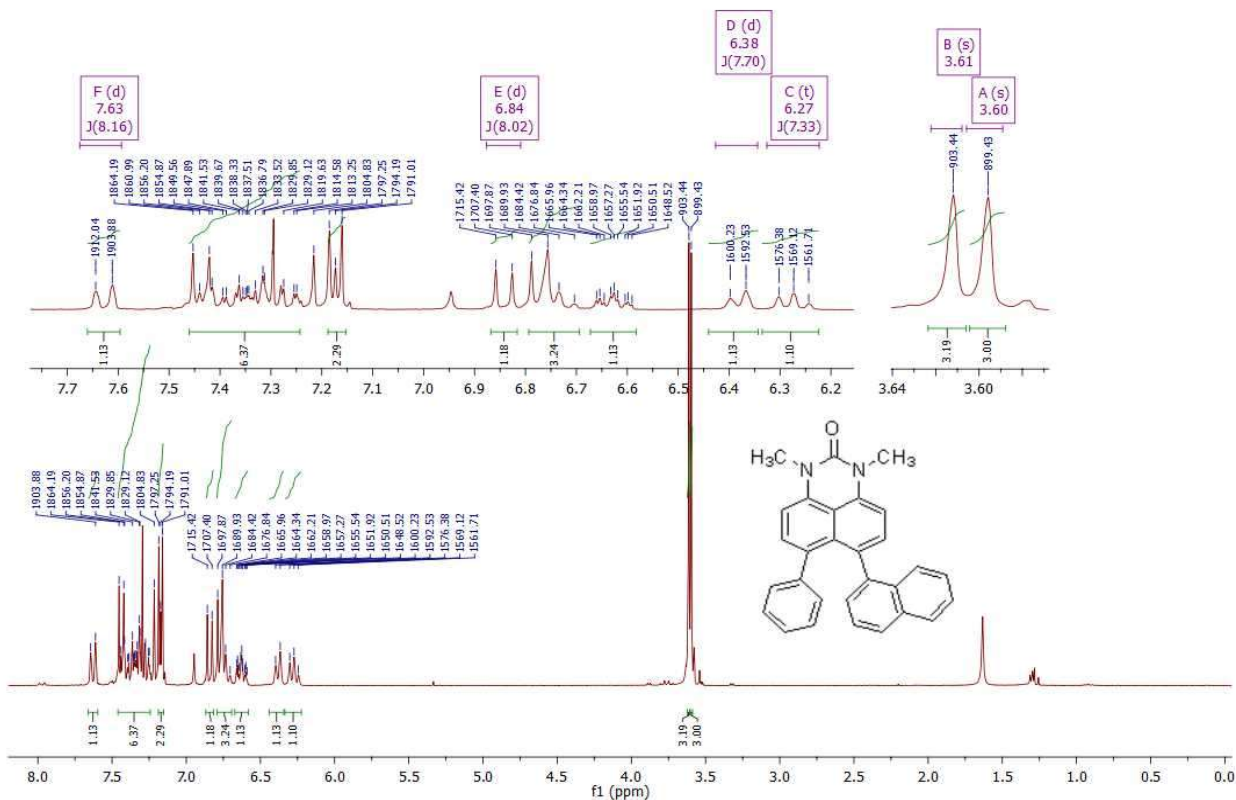

**Fig. S48.**  $^1\text{H}$  NMR spectrum of compound 3g (250 MHz,  $\text{CDCl}_3$ ).

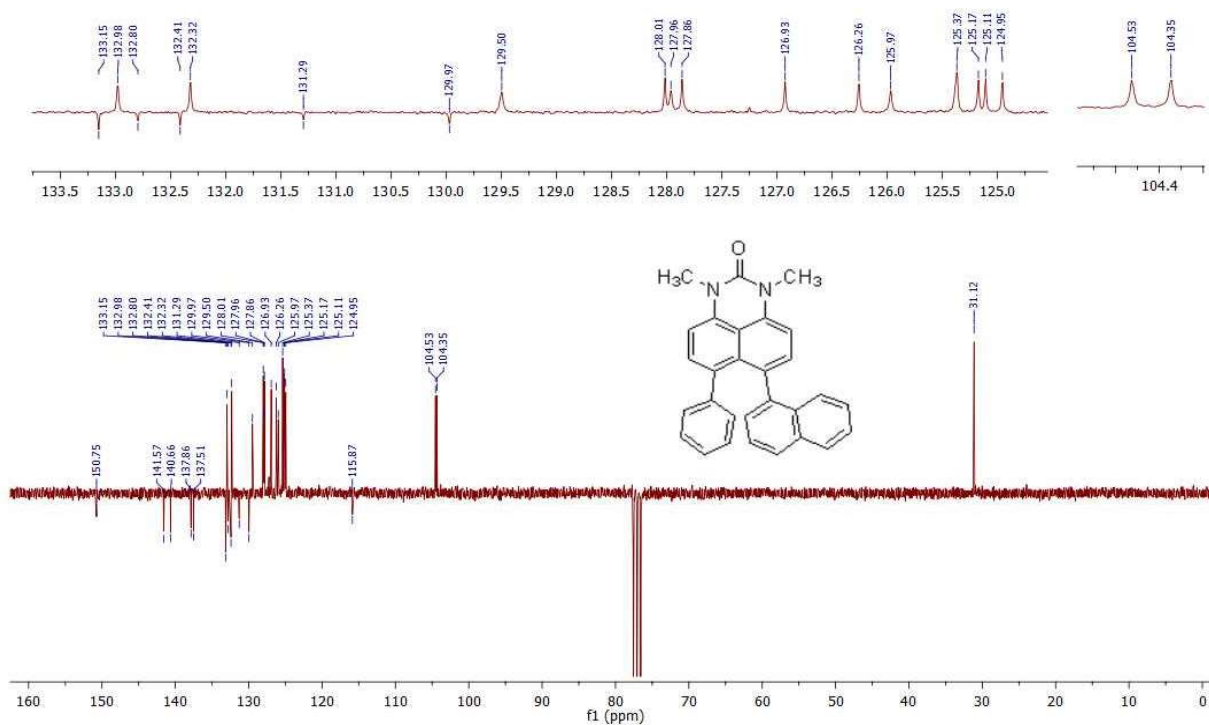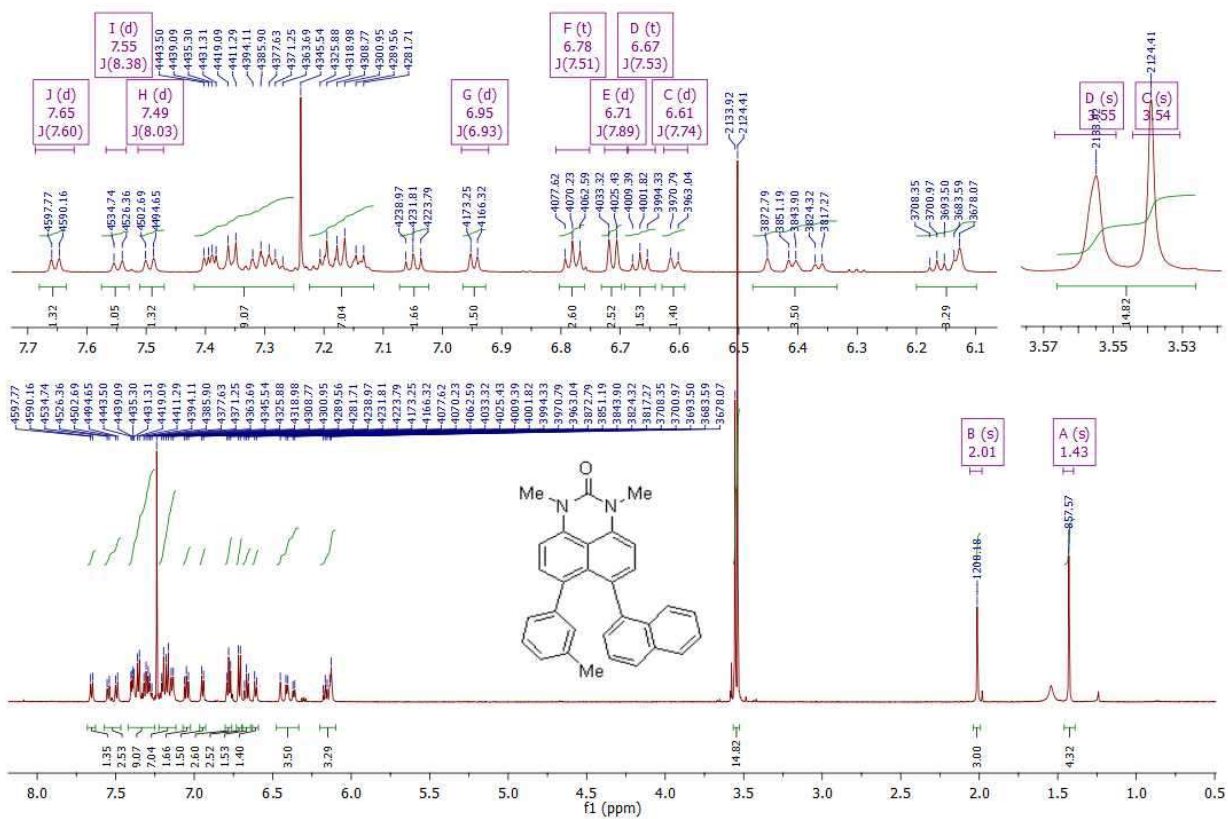



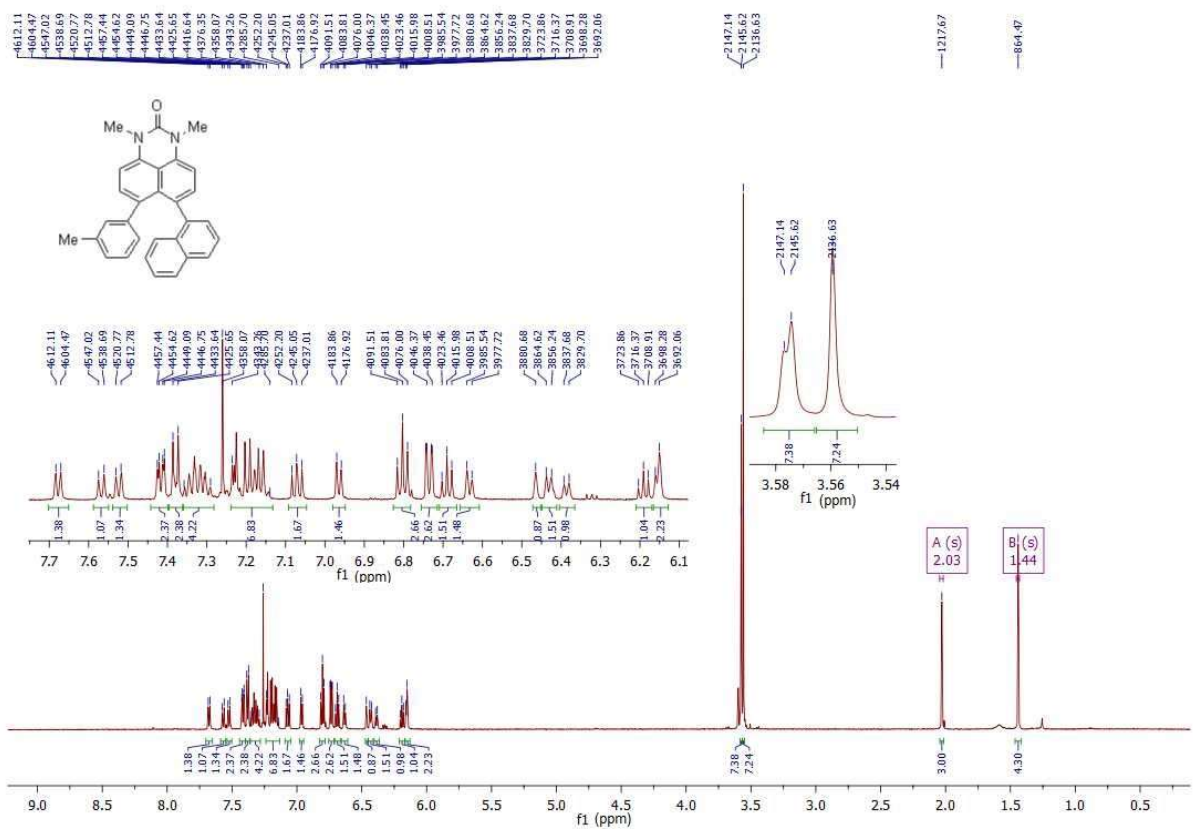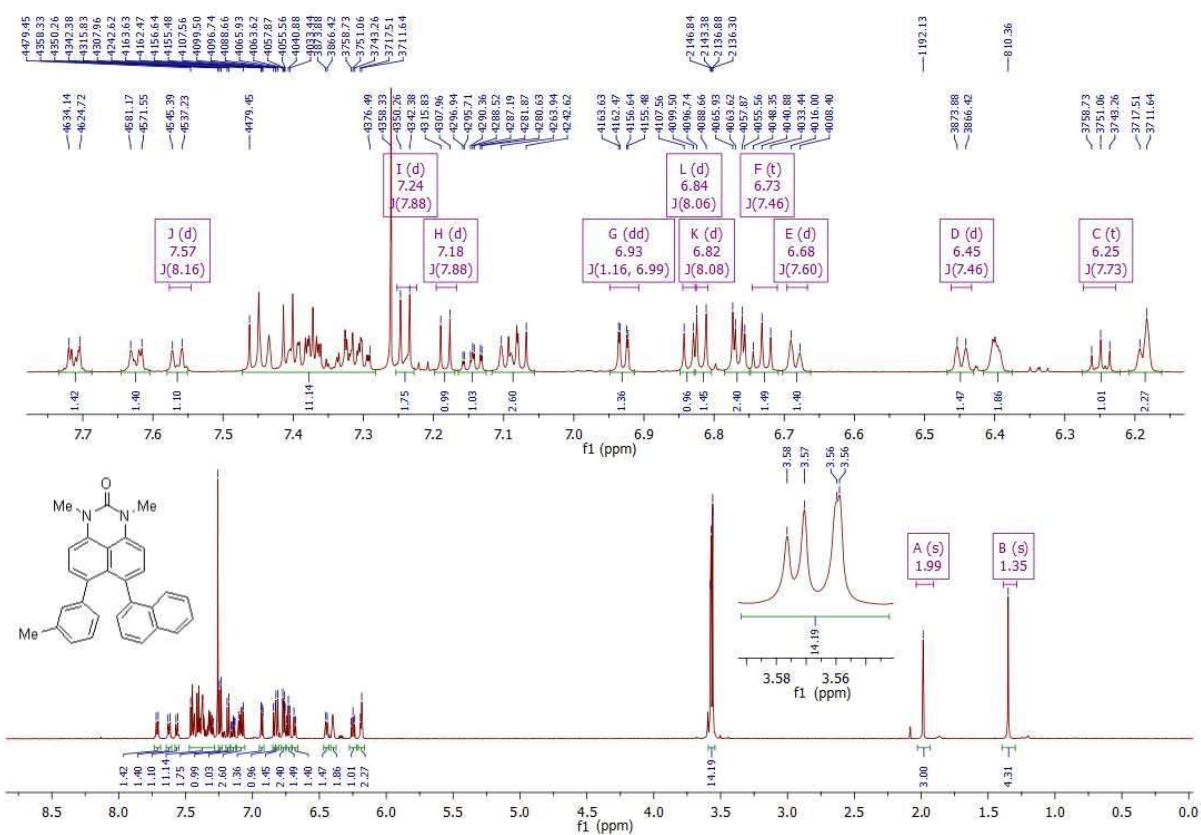

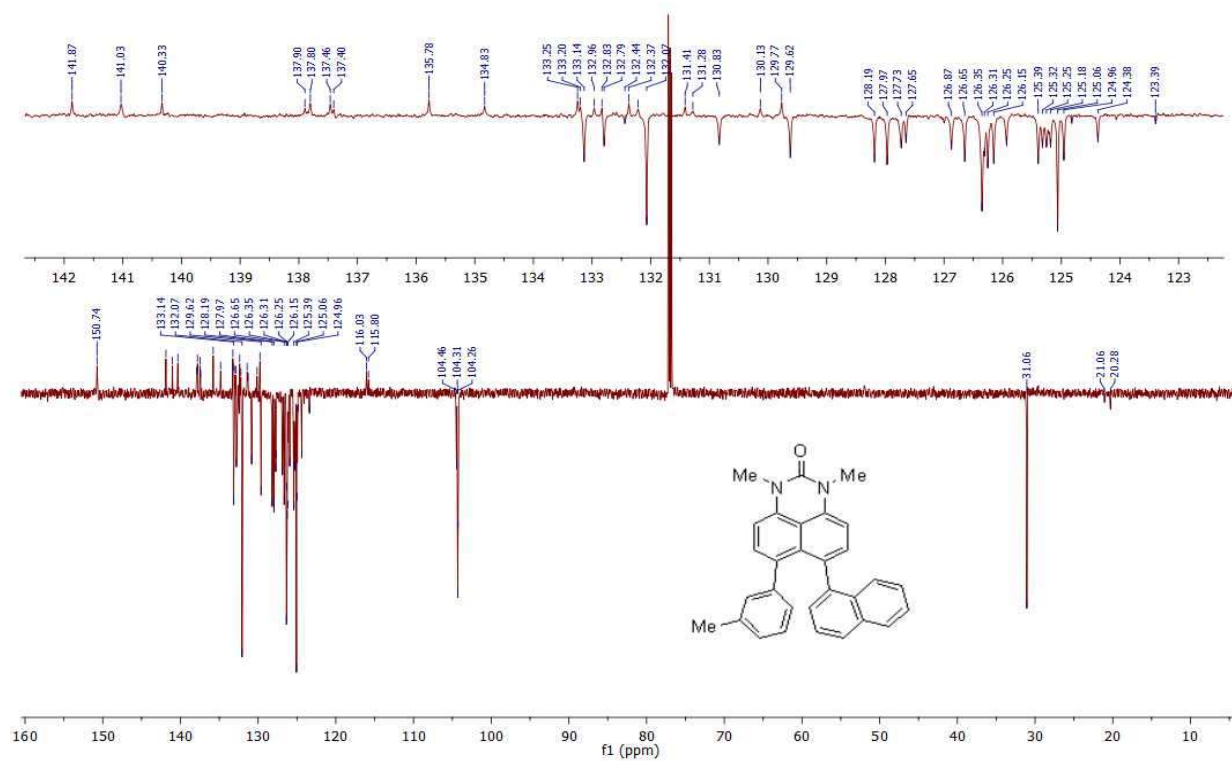

Fig. S53.  $^{13}\text{C}$  APT-NMR spectrum of compound **3h** (150 MHz,  $\text{DMSO-d}_6$ ).

## UV-vis, excitation and emission spectra

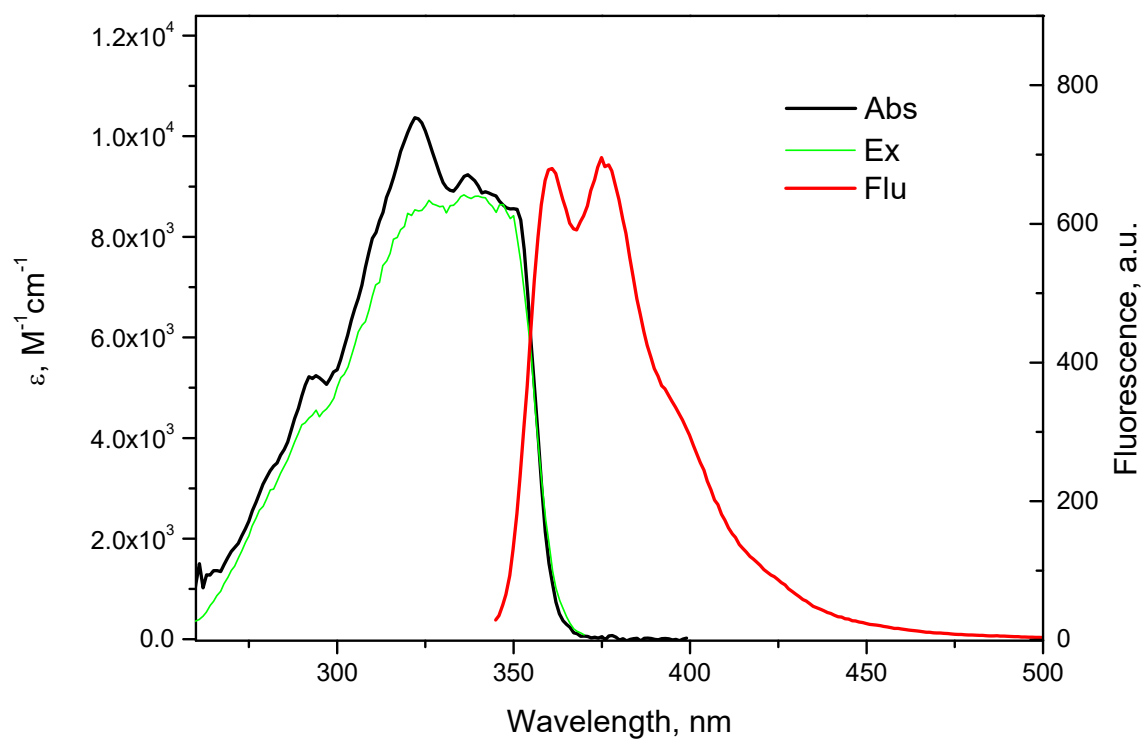

**Fig. S54.** Absorption, excitation and emission spectra of 1,3-dimethyl-1H-perimidin-2(3H)-one in DMSO, T = 293 K.

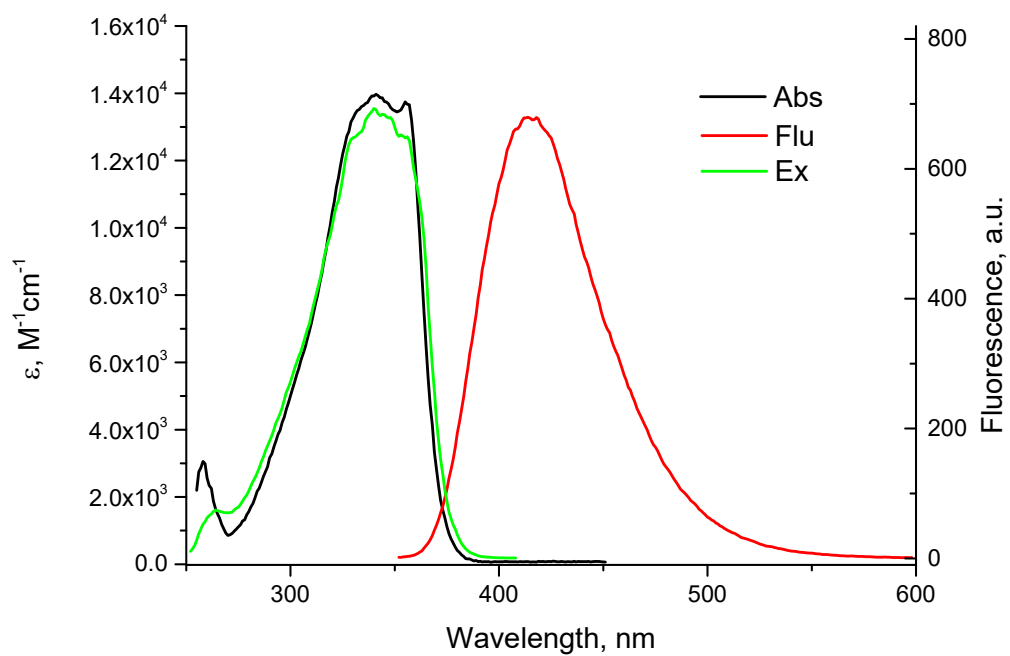

**Fig. S55.** Absorption, excitation and emission spectra of **6a** in DMSO, T = 293 K.

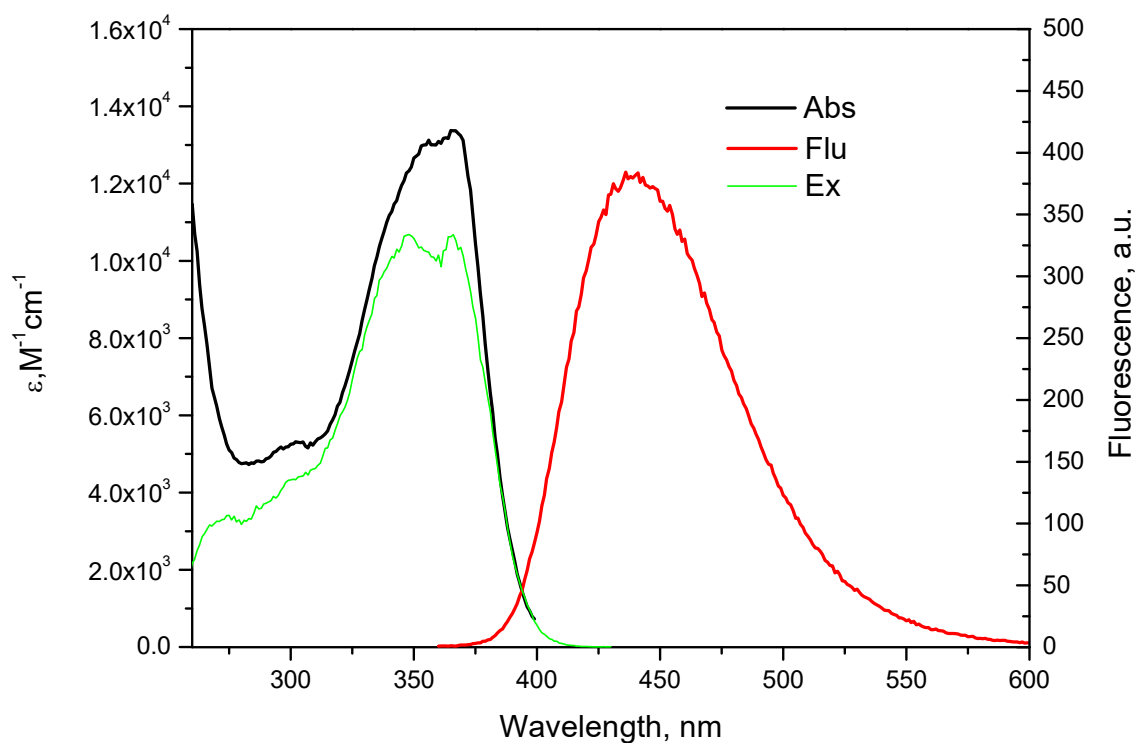

**Fig. S56.** Absorption, excitation and emission spectra of **6d** in DMSO, T = 293 K.

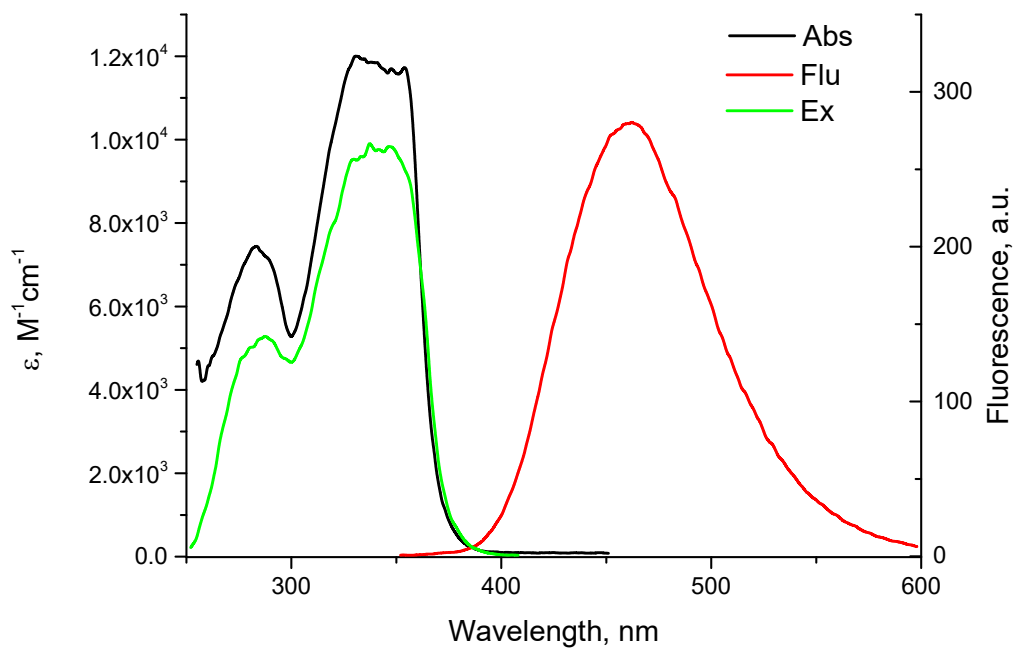

**Fig. S57.** Absorption, excitation and emission spectra of **6e** in DMSO, T = 293K.

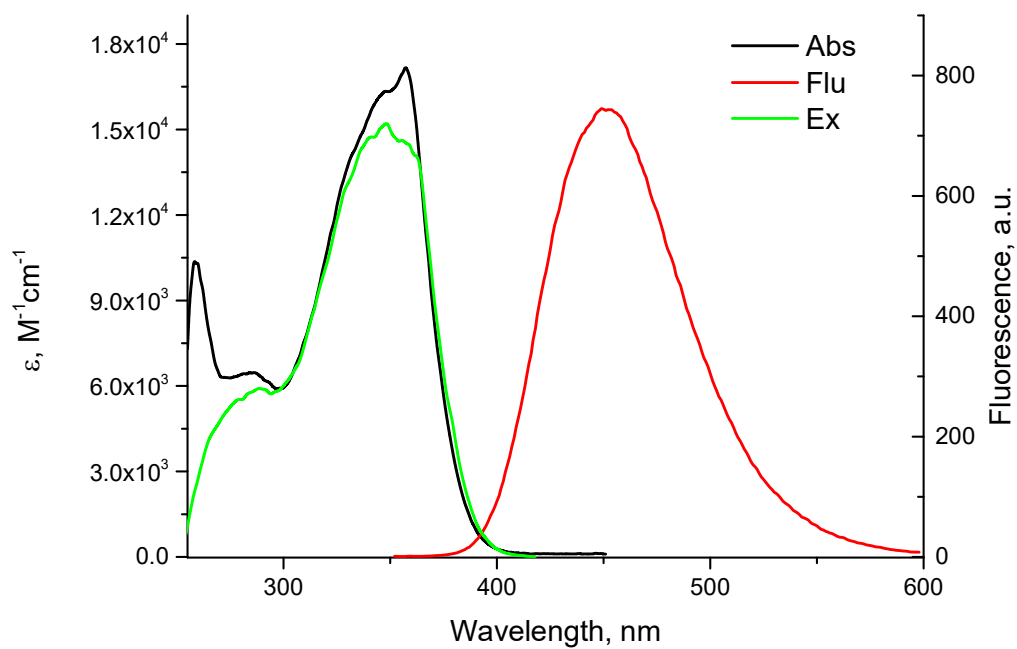

**Fig. S58.** Absorption, excitation and emission spectra of **6f** in DMSO, T = 293K.

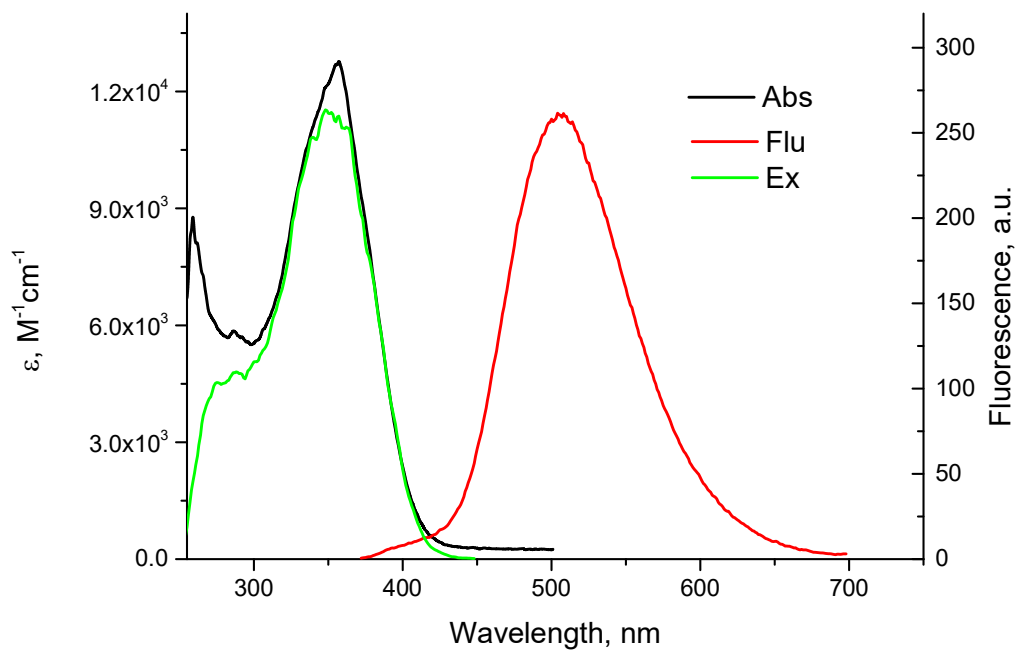

**Fig. S59.** Absorption, excitation and emission spectra of **6h** in DMSO, T = 293K.

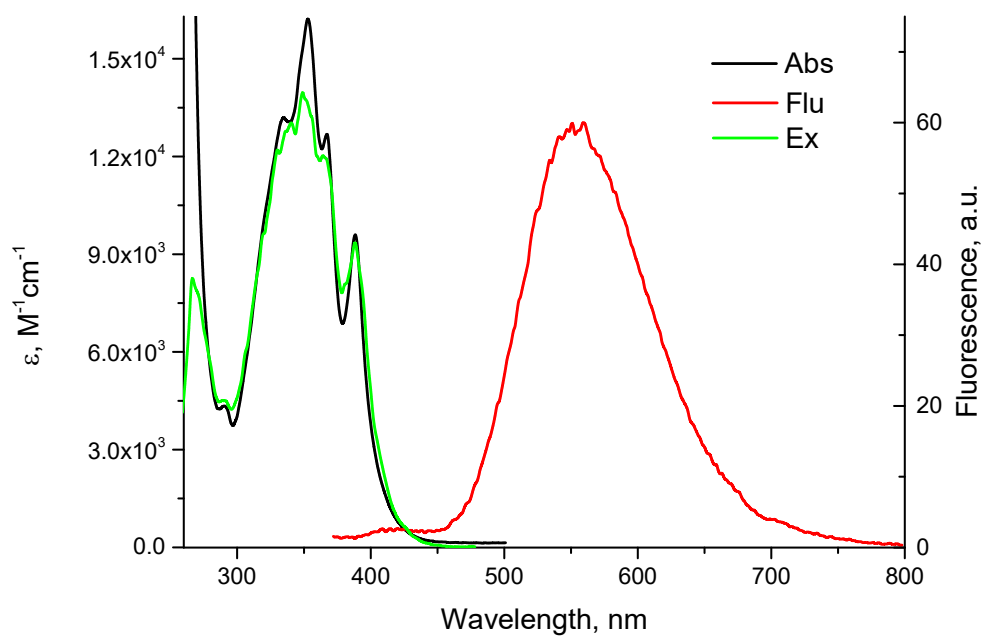

**Fig. S60.** Absorption, excitation and emission spectra of **6i** in DMSO, T = 293K.

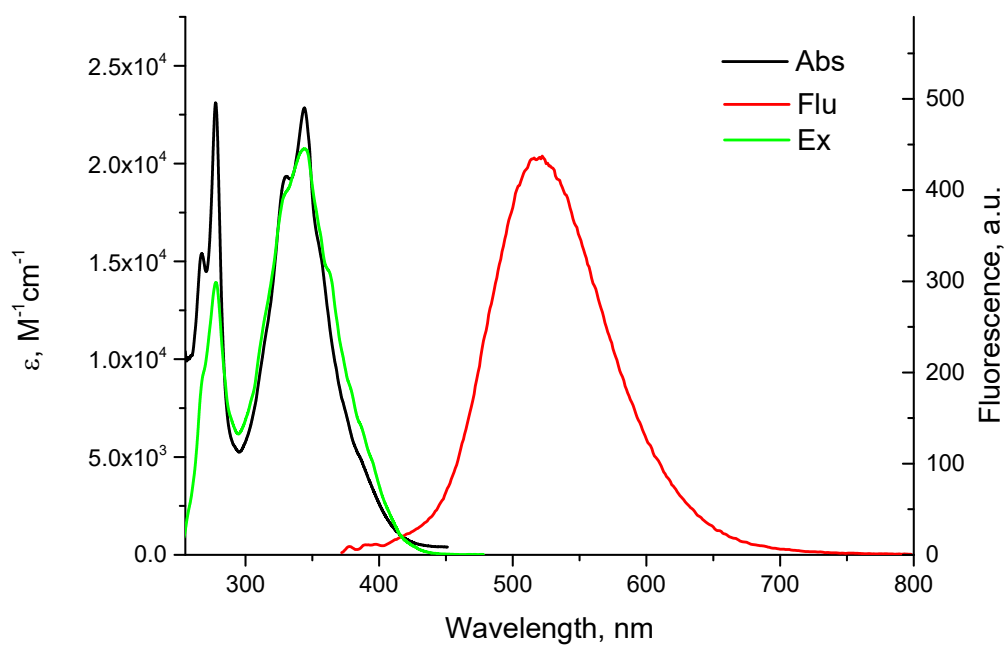

**Fig. S61.** Absorption, excitation and emission spectra of **6j** in DMSO, T = 293K.

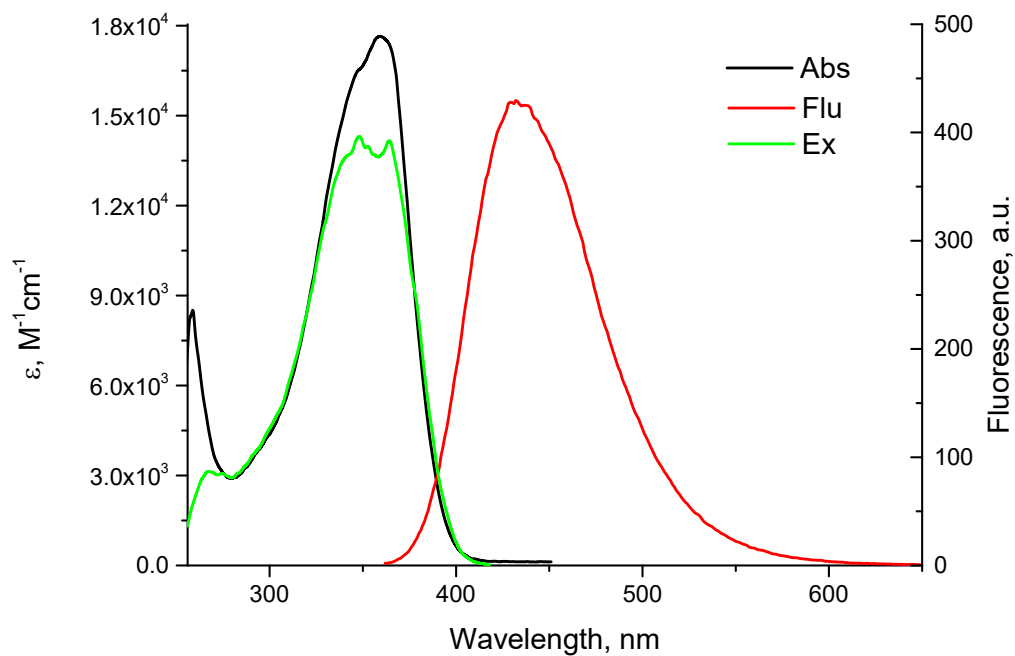

**Fig. S62.** Absorption, excitation and emission spectra of **3a** in DMSO, T = 293K.

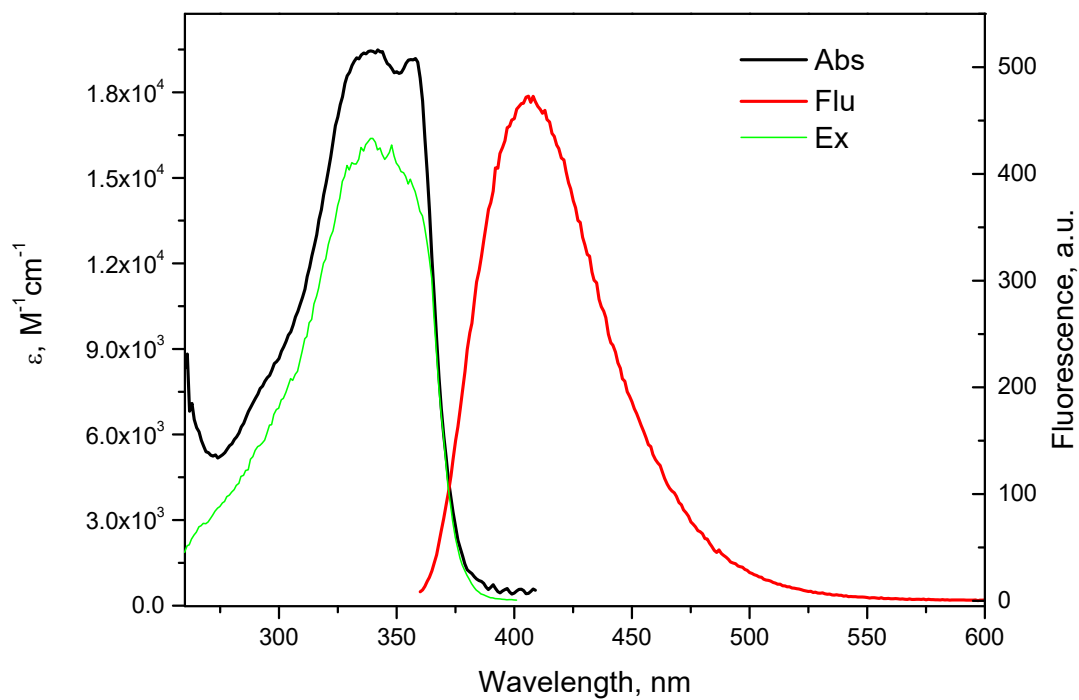

**Fig. S63.** Absorption, excitation and emission spectra of **3c** in DMSO, T = 293K.

## Calculations of the experimental *syn/anti*-isomerization barrier of compounds **3b** and **3f**

The *syn/anti*-isomerization barriers of compounds **3** were determined by the dynamic NMR, coalescence method (H. Günther, *NMR Spectroscopy: An Introduction*, John Wiley and Sons, Chichester – New York – Brisbane – Toronto, 1980, 436 p.).

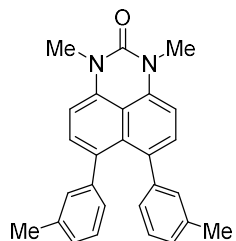

For compound **3b**, signals of the C-methyl groups were used for calculations,  $\Delta\nu_{AB}$  - difference in chemical shifts of signals of C-Me groups of rotamers under conditions of rapid exchange,  $\Delta\nu_{AB}^*$  - difference in chemical shifts of signals of C-Me groups of rotamers under conditions of slow exchange (-50 °C).

Calculation of the *syn/anti*-isomerization barrier using the Eyring equation,  $T_{\text{coal}} = 328\text{K}$  (see Fig.5 in the main text and Table S1):

$$\Delta G^\ddagger = 19.14T[10.32 - \log(k/T)],$$

the rate constant at the coalescence point can be estimated using the formula:  $k = \pi \Delta\nu_{AB}^* / \sqrt{2}$

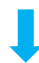

$$\Delta G^\ddagger = 19.14 \times 328(10.32 - (-0.075)) = 65\,259 \text{ J mol}^{-1} = 15.59 \text{ kcal mol}^{-1}$$

**Table S1.** Calculation of the activation parameters of *syn/anti*-isomerization of compound **3b** using the Eyring plot

| T, °C | T, K   | 1/T     | $\Delta\nu_{AB}$ , Hz | $\Delta\nu_{AB}^2$ | $\sqrt{(\Delta\nu_{AB}^{*2} - \Delta\nu_{AB}^2)}$ | $k = \pi \sqrt{(\Delta\nu_{AB}^{*2} - \Delta\nu_{AB}^2)} / \sqrt{2}$ | k/T    | log k/T |
|-------|--------|---------|-----------------------|--------------------|---------------------------------------------------|----------------------------------------------------------------------|--------|---------|
| -50   | 223.15 | 0,00448 | 124.4                 | 15475              |                                                   |                                                                      |        |         |
| -45   | 228.15 | 0,00438 | 122.5                 | 15006              | 21.656                                            | 48.108                                                               | 0.2109 | -0,676  |
| -40   | 233.15 | 0,00429 | 120.8                 | 14593              | 29.698                                            | 65.972                                                               | 0.2830 | -0,548  |
| -35   | 238.15 | 0,00420 | 118.9                 | 14137              | 36.579                                            | 81.258                                                               | 0.3412 | -0,467  |
| -30   | 243.15 | 0,00411 | 117.0                 | 13689              | 42.261                                            | 93.880                                                               | 0.3861 | -0,413  |
| -25   | 248.15 | 0,00403 | 115.2                 | 13271              | 46.947                                            | 104.290                                                              | 0.4203 | -0,376  |
| -20   | 253.15 | 0,00395 | 113.5                 | 12882              | 50.922                                            | 113.120                                                              | 0.4468 | -0,350  |
| -15   | 258.15 | 0,00387 | 111.7                 | 12477              | 54.754                                            | 121.633                                                              | 0.4712 | -0,327  |
| -10   | 263.15 | 0,00380 | 109.9                 | 12078              | 58.284                                            | 129.474                                                              | 0.4920 | -0,308  |
| -5    | 268.15 | 0,00373 | 108.2                 | 11707              | 61.384                                            | 136.361                                                              | 0.5085 | -0,294  |
| 0     | 273.15 | 0,00366 | 106.5                 | 11342              | 64.288                                            | 142.812                                                              | 0.5228 | -0,282  |
| +5    | 278.15 | 0,00360 | 105.0                 | 11025              | 66.708                                            | 148.188                                                              | 0.5328 | -0,273  |



|                    |        |         |       |       |         |         |        |        |
|--------------------|--------|---------|-------|-------|---------|---------|--------|--------|
| +10                | 283.15 | 0,00353 | 103.2 | 10650 | 69.462  | 154.306 | 0.5450 | -0,264 |
| +15                | 288.15 | 0,00347 | 101.5 | 10302 | 71.923  | 159.773 | 0.5545 | -0,256 |
| +20                | 293.15 | 0,00341 | 99.8  | 9960  | 74.263  | 164.971 | 0.5628 | -0,250 |
| +25                | 298.15 | 0,00335 | 98.0  | 9604  | 76.622  | 170.211 | 0.5709 | -0,243 |
| +30                | 303.15 | 0,00330 | 95.9  | 9197  | 79.233  | 176.011 | 0.5806 | -0,236 |
| +35                | 308.15 | 0,00325 | 92.8  | 8612  | 82.843  | 184.031 | 0.5972 | -0,224 |
| +40                | 313.15 | 0,00319 | 86.6  | 7500  | 89.303  | 198.381 | 0.6335 | -0,198 |
| +45                | 318.15 | 0,00314 | 75.3  | 5670  | 99.020  | 219.967 | 0.6914 | -0,160 |
| +50                | 323.15 | 0,00309 | 56.7  | 3215  | 110.725 | 245.969 | 0.7612 | -0,119 |
| +55<br>Coalescence | 328.15 | 0,00305 | 83    |       |         | 276.347 | 0.8421 | -0,075 |

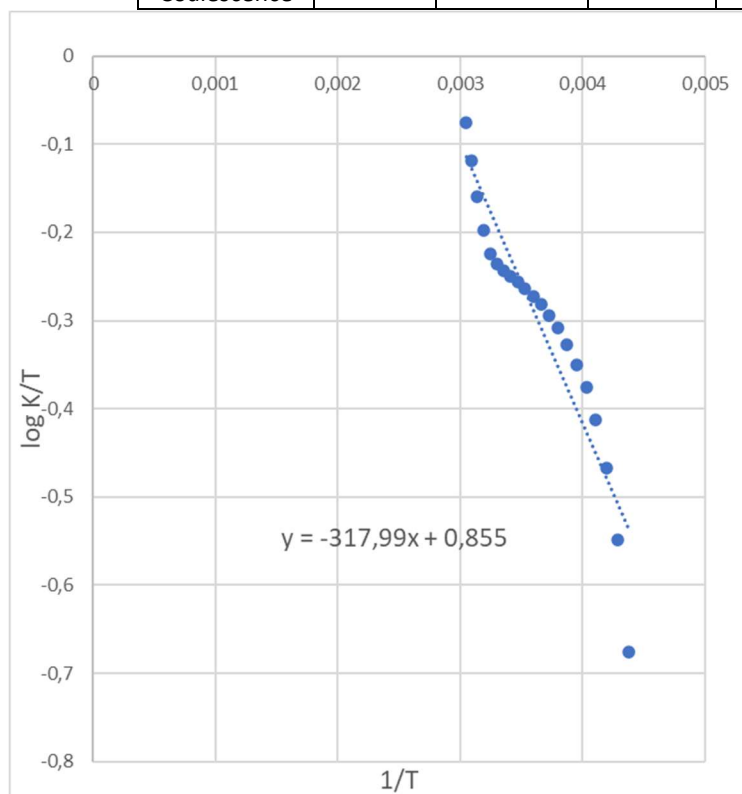

$$-317.99 = -\Delta H^\ddagger / 19.14 \quad \Delta H^\ddagger = 6086.32 \text{ J mol}^{-1}$$

$$0.855 = 10.32 + \Delta S^\ddagger / 19.14 \quad \Delta S^\ddagger = -181.16 \text{ J mol}^{-1} \text{ K}^{-1}$$

$$\Delta G^\ddagger = \Delta H^\ddagger - T\Delta S^\ddagger \text{ for } 328 \text{ K}$$

$$\Delta G^\ddagger = 65506 \text{ J mol}^{-1} = 15.66 \text{ kcal mol}^{-1}$$

Calculation of the *syn/anti*-isomerization barrier of compound **3f** using the Eyring equation,

$$T_{\text{coal}} = 298\text{K (see Fig.7, main text, Table S2):}$$

$$\Delta G^\ddagger = 19.14T[10.32 - \log(k/T)] = 19.14 \times 298(10.32 - (-0.891)) = 63944 \text{ J mol}^{-1} = 15.28 \text{ kcal mol}^{-1}$$

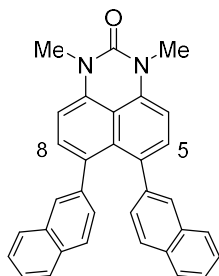

**Table S2.** Calculation of the *syn/anti*-isomerization barrier of compound **3f** using the Eyring plot

(signals of the H(5), H(8) protons at -10...+30 °C were used for calculations,  $\Delta\nu_{\text{AB}}$  - difference in chemical shifts of signals of the H(5), H(8) protons of rotamers under conditions of rapid exchange,  $\Delta\nu_{\text{AB}}^*$  - difference in chemical shifts of signals of the H(5), H(8) protons of rotamers under conditions of slow exchange (-10 °C))

| T, °C | T, K   | 1/T     | $\Delta\nu_{\text{AB}}$ , Hz | $\Delta\nu_{\text{AB}}^2$ | $\sqrt{(\Delta\nu_{\text{AB}}^{*2} - \Delta\nu_{\text{AB}}^2)}$ | $k = \pi \sqrt{(\Delta\nu_{\text{AB}}^{*2} - \Delta\nu_{\text{AB}}^2)} / \sqrt{2}$ | k/T    | log k/T |
|-------|--------|---------|------------------------------|---------------------------|-----------------------------------------------------------------|------------------------------------------------------------------------------------|--------|---------|
| -45   | 228,15 | 0,00438 | 17,0                         | 289                       |                                                                 |                                                                                    |        |         |
| -40   | 233,15 | 0,00429 | 17,1                         | 292,41                    |                                                                 |                                                                                    |        |         |
| -35   | 238,15 | 0,00420 | 17,1                         | 292,41                    |                                                                 |                                                                                    |        |         |
| -30   | 243,15 | 0,00411 | 17,2                         | 295,84                    |                                                                 |                                                                                    |        |         |
| -25   | 248,15 | 0,00403 | 17,2                         | 295,84                    |                                                                 |                                                                                    |        |         |
| -20   | 253,15 | 0,00395 | 17,2                         | 295,84                    |                                                                 |                                                                                    |        |         |
| -15   | 258,15 | 0,00387 | 17,2                         | 295,84                    |                                                                 |                                                                                    |        |         |
| -10   | 263,15 | 0,00380 | 17,2                         | 295,84                    |                                                                 |                                                                                    |        |         |
| -5    | 268,15 | 0,00373 | 17,1                         | 292,41                    | 1,85                                                            | 4,12                                                                               | 0,0154 | -1,8124 |
| 0     | 273,15 | 0,00366 | 16,9                         | 285,61                    | 3,20                                                            | 7,13                                                                               | 0,0261 | -1,5833 |
| +5    | 278,15 | 0,00360 | 16,4                         | 268,96                    | 5,18                                                            | 11,53                                                                              | 0,0414 | -1,3830 |
| +10   | 283,15 | 0,00353 | 15,6                         | 243,36                    | 7,24                                                            | 16,12                                                                              | 0,0569 | -1,2448 |
| +15   | 288,15 | 0,00347 | 13,2                         | 174,24                    | 11,02                                                           | 24,54                                                                              | 0,0852 | -1,0695 |
| +20   | 293,15 | 0,00341 | 9,6                          | 92,16                     | 14,27                                                           | 31,77                                                                              | 0,1084 | -0,9650 |

|                    |        |         |     |       |       |       |        |         |
|--------------------|--------|---------|-----|-------|-------|-------|--------|---------|
| +25<br>Coalescence | 298,15 | 0,00335 | 8.5 | 72,25 | 14,95 | 33,29 | 0,1117 | -0,9519 |
| +30                | 303,15 | 0,00330 | 7.5 | 56,25 | 15,48 | 34,47 | 0,1137 | -0,9442 |
| +35                | 308,15 | 0,00324 | 7.7 | 59,29 | 15,38 | 34,25 | 0,1111 | -0,9543 |
| +40                | 313,15 | 0,00319 | 7.8 | 60,84 | 15,33 | 34,14 | 0,1090 | -0,9625 |
| +45                | 318,15 | 0,00314 | 7.8 | 60,84 | 15,33 | 34,14 | 0,1073 | -0,9694 |
| +50                | 323,15 | 0,00309 | 7.8 | 60,84 | 15,33 | 34,14 | 0,1056 | -0,9763 |

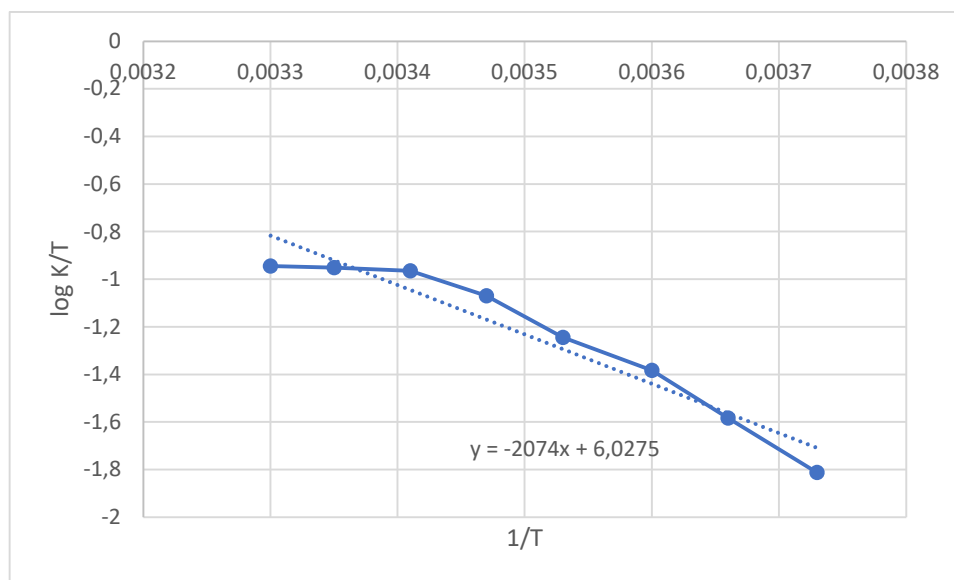

$$-2074 = -\Delta H^\ddagger / 19.14 \quad \Delta H^\ddagger = 39\,696,36 \text{ J mol}^{-1}$$

$$6.0275 = 10.32 + \Delta S^\ddagger / 19.14 \quad \Delta S^\ddagger = -82.158 \text{ J mol}^{-1} \text{ K}^{-1}$$

$$\Delta G^\ddagger = \Delta H^\ddagger - T\Delta S^\ddagger \text{ for } 298 \text{ K} \quad \Delta G^\ddagger = 64\,179 \text{ J mol}^{-1} = 15.34 \text{ kcal mol}^{-1}$$

### Dynamic NMR simulation for compounds 3b and 3f

Spectral parameters were determined by iterative full line shape analysis using the gNMR simulation program: P. H. M. Budzelaar, gNMR, Version 5.0.6.0, 2006

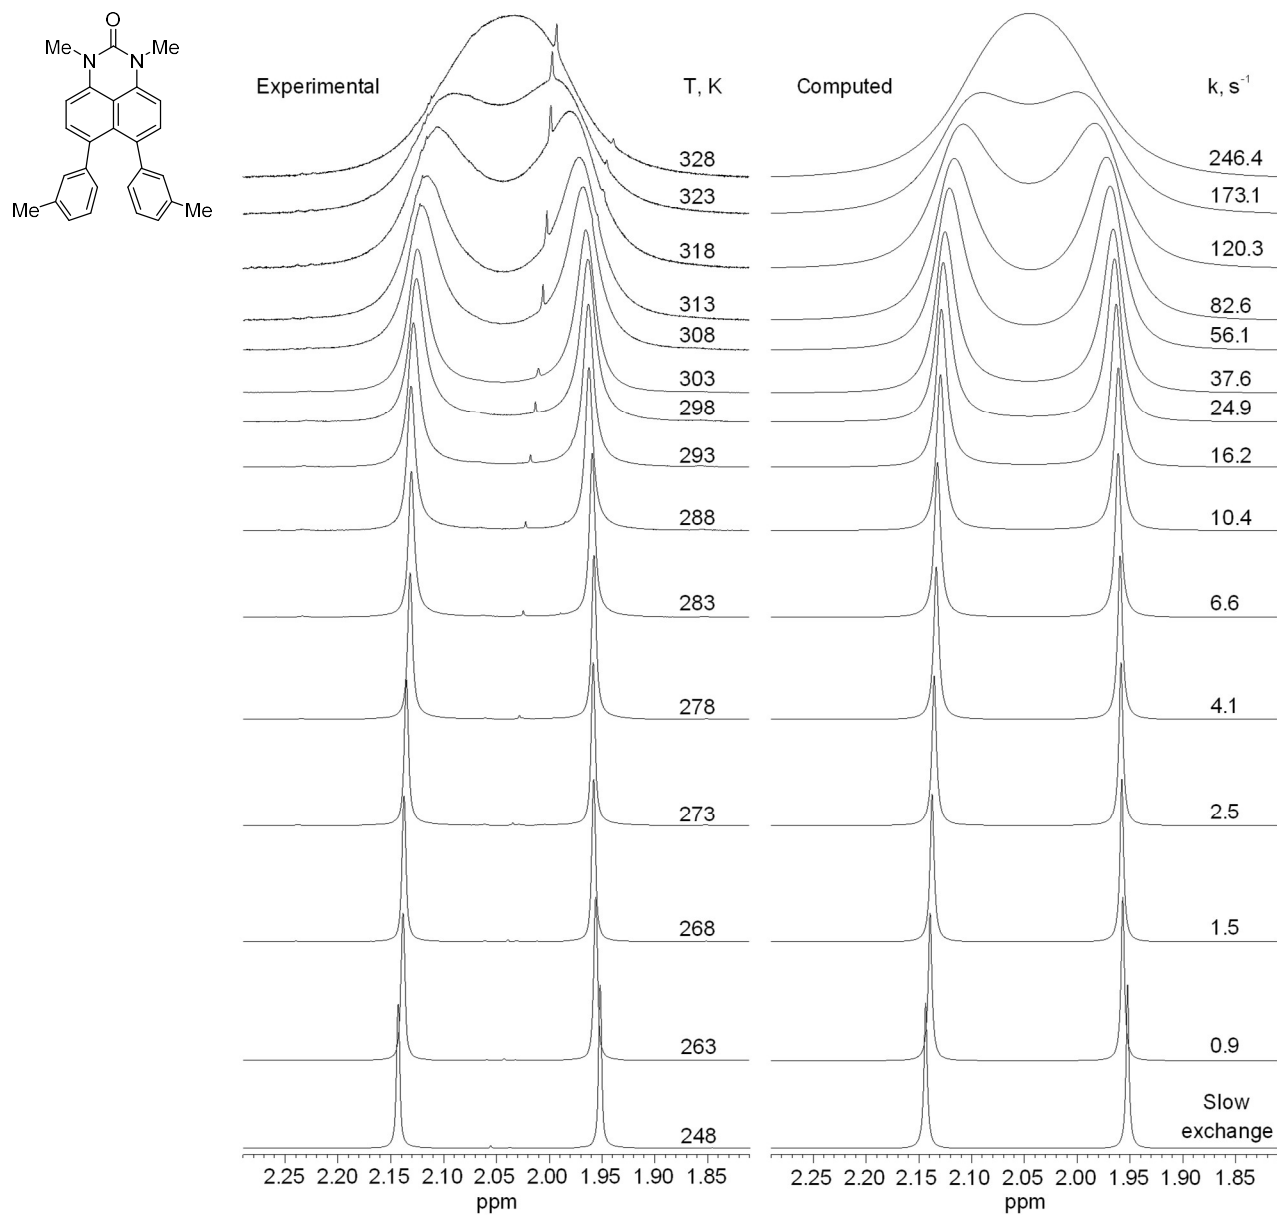

**Figure S64.** Experimental and calculated NMR of the methyl resonances for compound **3b**

**Table S3.** The data on dynamic NMR simulation for compound **3b** using the Eyring equation (signals of the C-methyl groups were used for calculations)

| T, K          | k, s <sup>-1</sup> | $\Delta G^{\#}_{sim}$ , kcal mol <sup>-1</sup> |
|---------------|--------------------|------------------------------------------------|
| 223,15        | 0,01               | 15,20                                          |
| 263,15        | 0,90               | 15,38                                          |
| 268,15        | 1,52               | 15,40                                          |
| 273,15        | 2,53               | 15,42                                          |
| 278,15        | 4,12               | 15,44                                          |
| 283,15        | 6,61               | 15,46                                          |
| 288,15        | 10,44              | 15,49                                          |
| 293,15        | 16,24              | 15,51                                          |
| <b>298,15</b> | <b>24,88</b>       | <b>15,53</b>                                   |
| 303,15        | 37,60              | 15,55                                          |
| 308,15        | 56,09              | 15,57                                          |
| 313,15        | 82,62              | 15,60                                          |
| 318,15        | 120,27             | 15,62                                          |
| 323,15        | 173,09             | 15,64                                          |
| 328,15        | 246,42             | 15,66                                          |

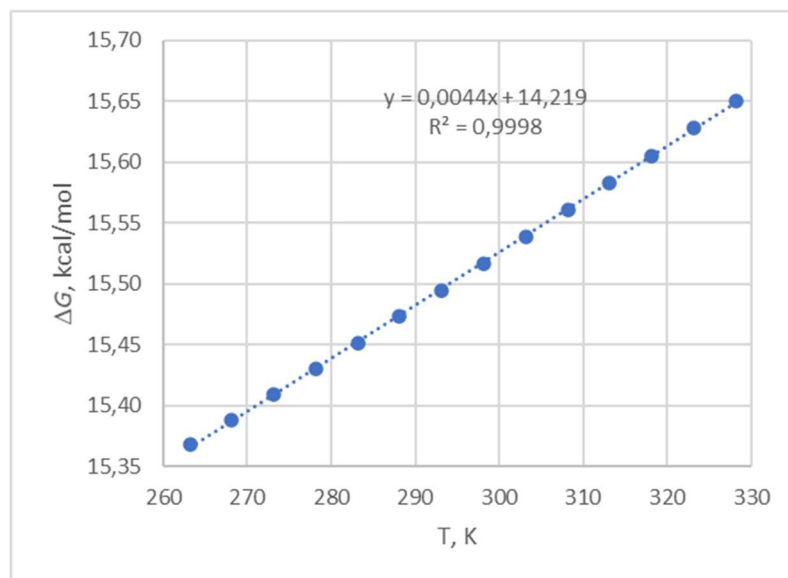

**Table S4.** The data on dynamic NMR simulation for compound **3f** using the Eyring equation (signals of the H(5), H(8) protons at 0...+50 °C were used for calculations)

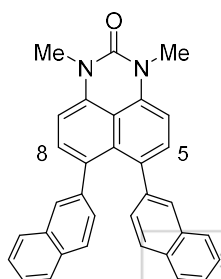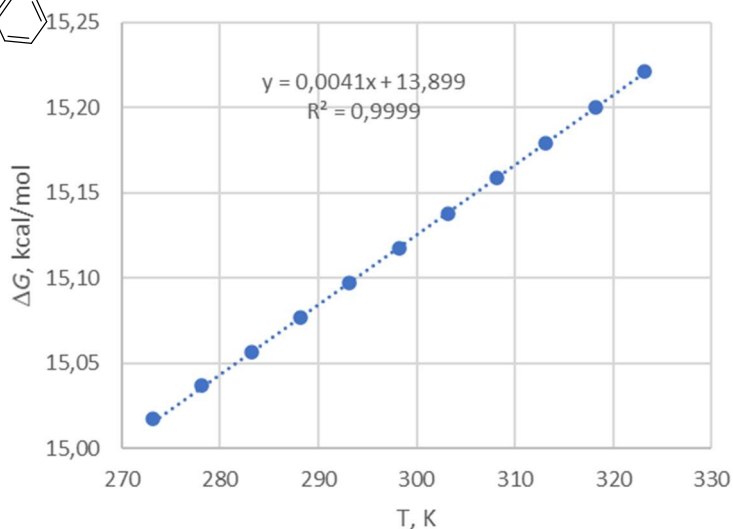

| T, K          | k, s <sup>-1</sup> | $\Delta G^{\#}_{sim}$ , kcal mol <sup>-1</sup> |
|---------------|--------------------|------------------------------------------------|
| 223,15        | 0,01               | 14,81                                          |
| 273,15        | 5,30               | 15,02                                          |
| 278,15        | 8,56               | 15,04                                          |
| 283,15        | 13,60              | 15,06                                          |
| 288,15        | 21,26              | 15,08                                          |
| 293,15        | 32,74              | 15,10                                          |
| <b>298,15</b> | <b>49,70</b>       | <b>15,12</b>                                   |
| 303,15        | 74,45              | 15,14                                          |
| 308,15        | 110,10             | 15,16                                          |
| 313,15        | 160,84             | 15,18                                          |
| 318,15        | 232,25             | 15,20                                          |
| 323,15        | 331,63             | 15,22                                          |

### Quantum-chemical calculations of the *syn/anti* isomerization barriers of compounds 3

**Theoretical Calculations.** All calculations were performed using the PBE0 exchange-correlation functional<sup>3</sup> with the def2-SVP basis set<sup>4</sup> and D3(BJ) dispersion correction<sup>5</sup>. Relaxed surface scans were conducted using the ORCA 5.04 software<sup>6</sup>, with solvent effects (chloroform) considered through the CPCM model.<sup>7</sup> The naphthyl-aryl torsion was changed in four-degree increments (from 300 to -60 degree). The corresponding dihedral angle was fixed and the rest of the molecule fully relaxed. These calculations were carried out for 91 points and resulted in smooth and continuous energy profiles. The structures corresponding to the maxima and minima on the energy profile are given in Tables S5–S8. The atom coordinates of the optimized structures of *syn*- and *anti*-isomers and their energies are given in Table S9.



**Table S5.** Dependence of the rotamer energy on dihedral angle C(7)-C(6)-C(5)-C(4) for compound **3b**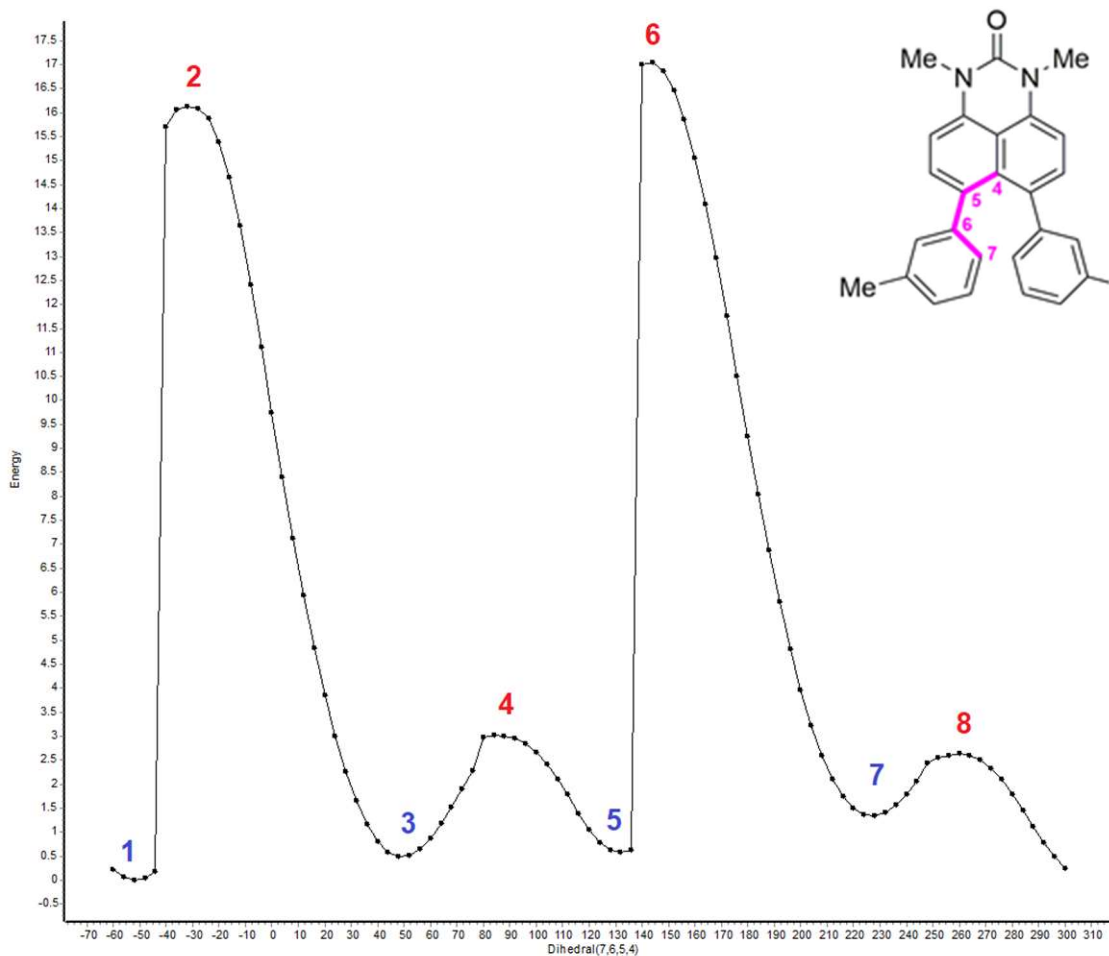

| Dihedral (7,6,5,4) | Energy                | Dihedral (7,6,5,4) | Energy                |
|--------------------|-----------------------|--------------------|-----------------------|
| 300                | 0,25487617932         | 120                | 1.04588255095         |
| 296                | 0,48359133065         | 116                | 1.39436733890         |
| 292                | 0,77687789239         | 112                | 1.79414897770         |
| 288                | 1,11472960336         | 108                | 2.09350306367         |
| 284                | 1,45781584292         | 104                | 2.41556256302         |
| 280                | 1,79787482418         | 100                | 2.66235757527         |
| 276                | 2,09760639650         | 96                 | 2.83879787072         |
| 272                | 2,33291006451         | 92                 | 2.95519873382         |
| 268                | 2,50398128266         | 88                 | 3.00998951805         |
| 264                | 2,60761847641         | 84                 | <b>3.01397382180</b>  |
| <b>260</b>         | <b>2,63671189819</b>  | 80                 | 2.97100952526         |
| 256                | 2,60254463221         | 76                 | 2.28839569578         |
| 252                | 2,55442367965         | 72                 | 1.91079344874         |
| 248                | 2,44248459305         | 68                 | 1.53098357858         |
| 244                | 2,06630184395         | 64                 | 1.18110268122         |
| 240                | 1,78576181994         | 60                 | 0.87694573114         |
| 236                | 1,56209140127         | 56                 | 0.65076129101         |
| 232                | 1,41216684044         | 52                 | 0.50854591390         |
| <b>228</b>         | <b>1,34464718458</b>  | <b>48</b>          | <b>0.48914731805</b>  |
| 224                | 1,37186499189         | 44                 | 0.58841386290         |
| 220                | 1,49941143587         | 40                 | 0.81236407551         |
| 216                | 1,74153436127         | 36                 | 1.16671574828         |
| 212                | 2,10833183853         | 32                 | 1.65233535609         |
| 208                | 2,60517506358         | 28                 | 2.25257050831         |
| 204                | 3,22696621129         | 24                 | 2.99411462273         |
| 200                | 3,96790247305         | 20                 | 3.85956235037         |
| 196                | 4,82257871139         | 16                 | 4.84507389534         |
| 192                | 5,78999909169         | 12                 | 5.93841368088         |
| 188                | 6,86418705509         | 8                  | 7.12826866318         |
| 184                | 8,02991285197         | 4                  | 8.40586383977         |
| 180                | 9,25698848809         | 0                  | 9.74082803079         |
| 176                | 10,51438844923        | -4                 | 11.09803785838        |
| 172                | 11,76751812097        | -8                 | 12.41681480732        |
| 168                | 12,97770141910        | -12                | 13.64636882365        |
| 164                | 14,08986649901        | -16                | 14.65338957578        |
| 160                | 15,05462932264        | -20                | 15.38475841594        |
| 156                | 15,86269675135        | -24                | 15.87492333846        |
| 152                | 16,46905361205        | -28                | 16.08675721042        |
| 148                | 16,85656719034        | <b>-32</b>         | <b>16.12578297825</b> |
| <b>144</b>         | <b>17,04302254636</b> | -36                | 16.05010974950        |
| 140                | 17,00370659184        | -40                | 15.70818922877        |
| 136                | 0,63477557551         | -44                | 0.18302006077         |

|     |               |     |               |
|-----|---------------|-----|---------------|
| 132 | 0,57068365662 | -48 | 0.03478110646 |
| 128 | 0,61649318798 | -52 | 0.00000000000 |
| 124 | 0,78072197921 | -56 | 0.06531492626 |
|     |               | -60 | 0.22127187216 |

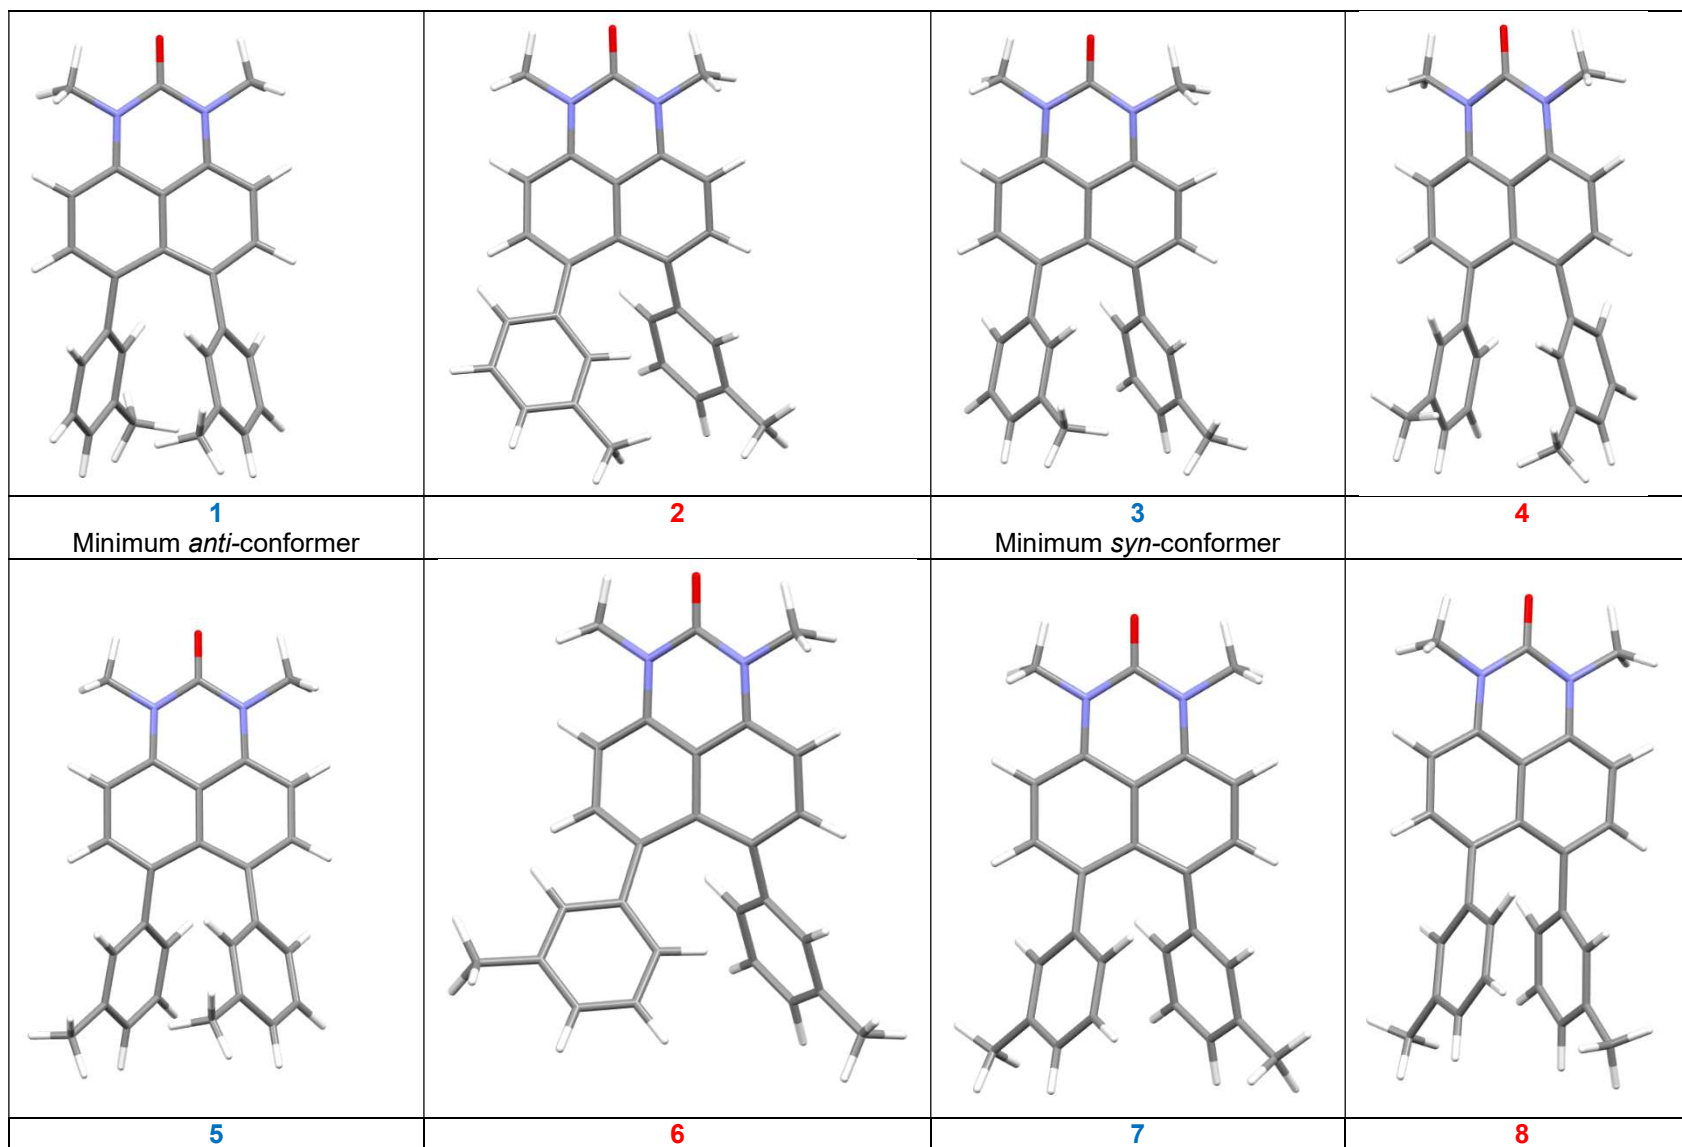

**Table S6.** Dependence of the rotamer energy on dihedral angle C(9)-C(8)-C(7)-C(6) for compound **3f**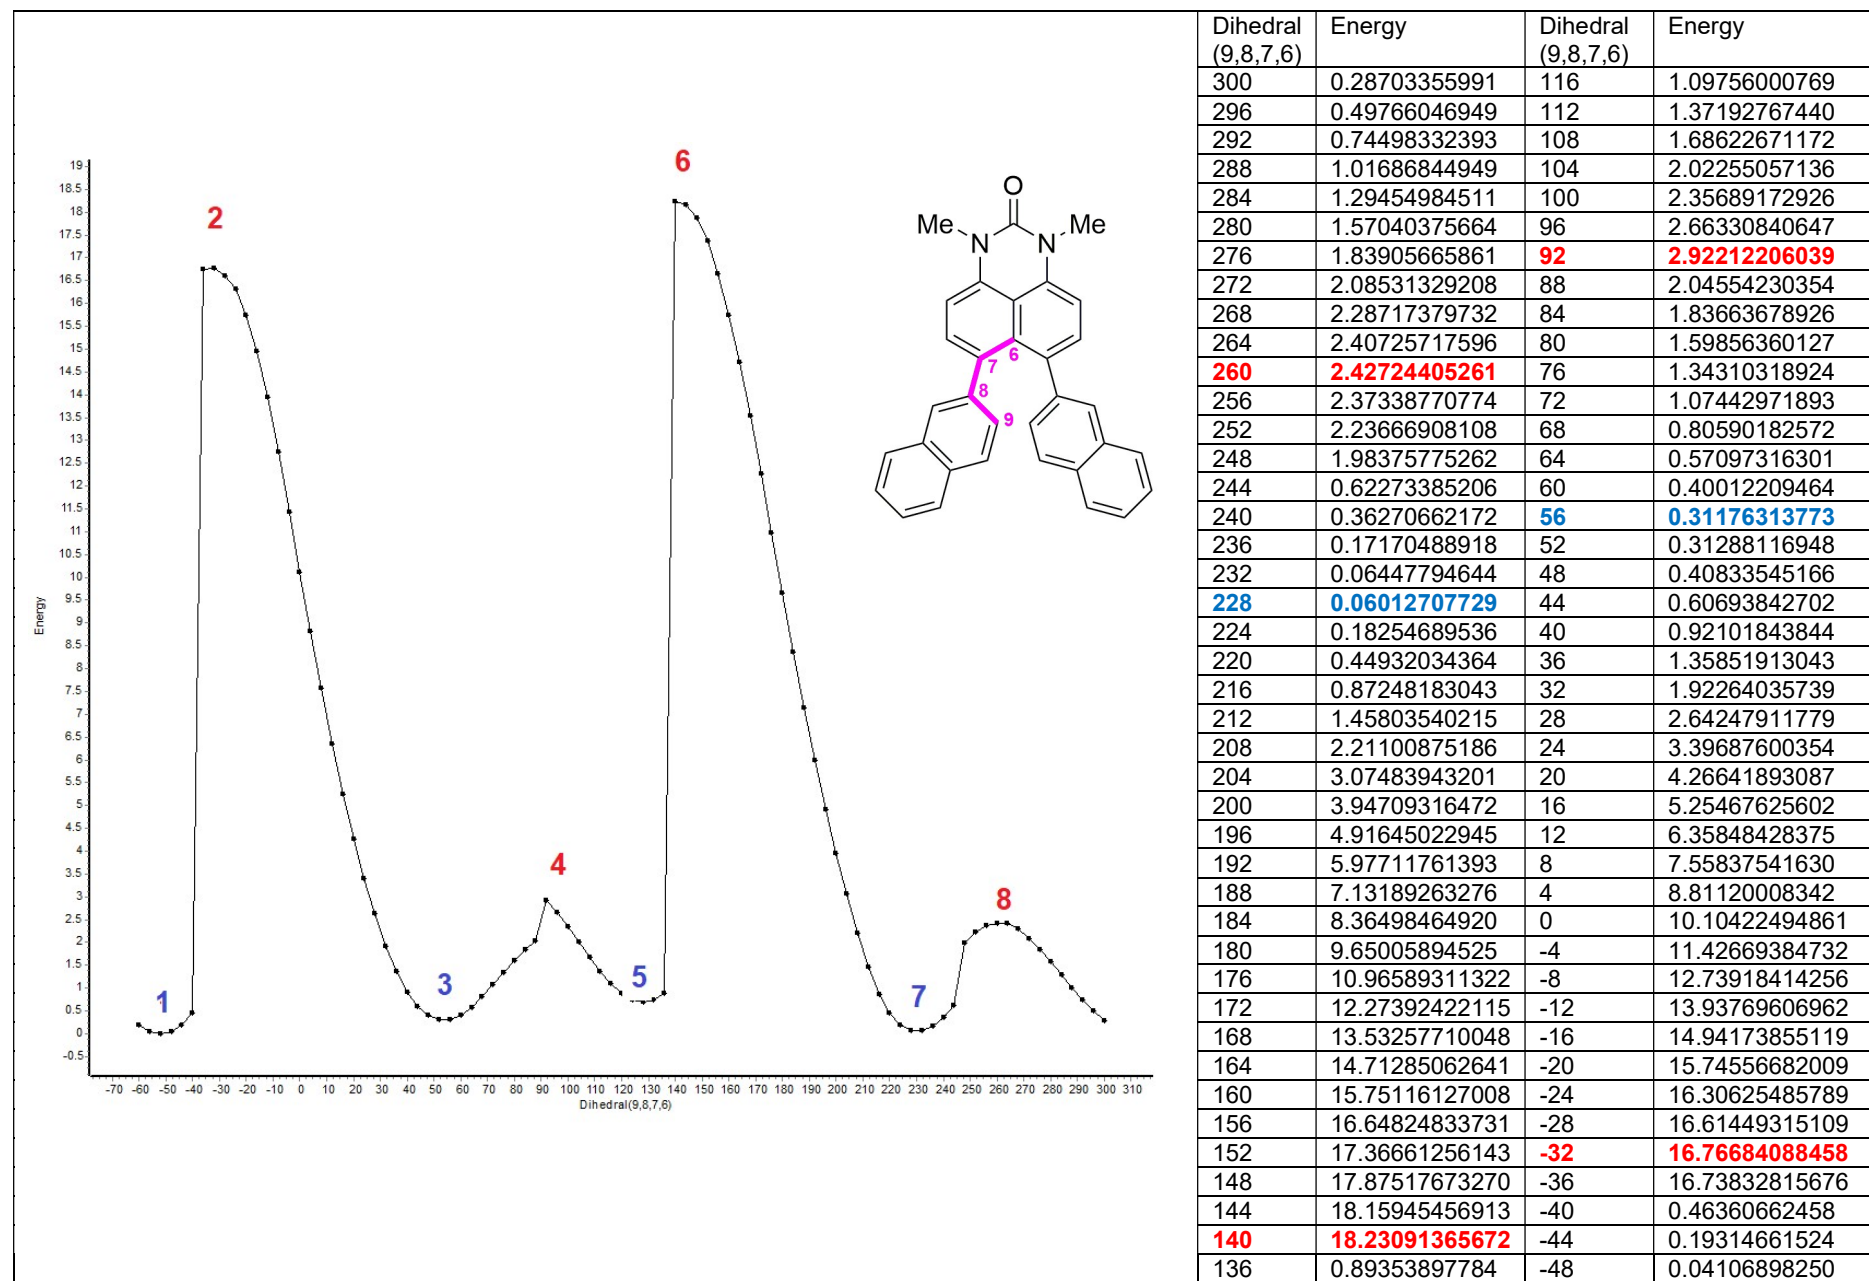

|            |                      |     |               |
|------------|----------------------|-----|---------------|
| 132        | 0.73465189891        | -52 | 0.00000000000 |
| <b>128</b> | <b>0.68785141582</b> | -56 | 0.05640049730 |
| 124        | 0.73900479610        | -60 | 0.19345788747 |
| 120        | 0.88097878222        |     |               |

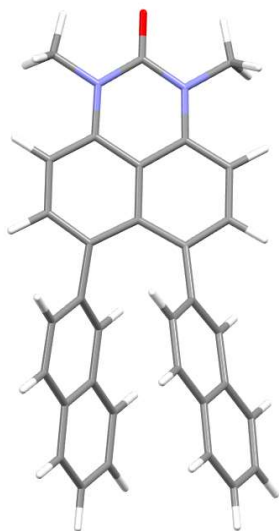**1**Minimum *syn*-conformer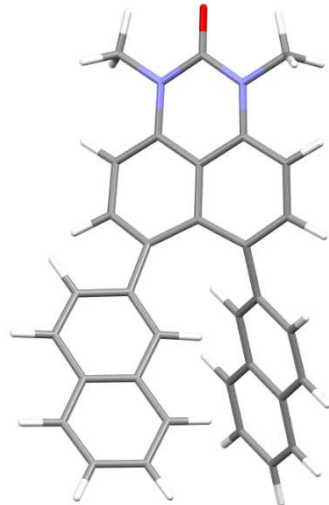**2**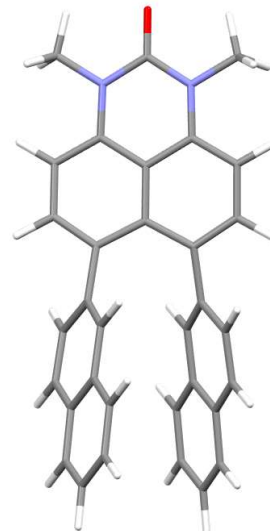**3**Minimum *anti*-conformer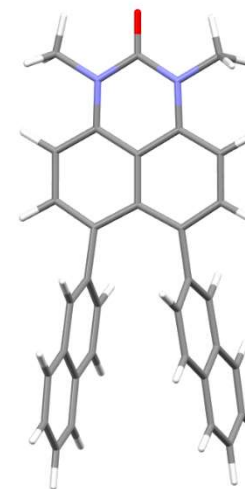**4**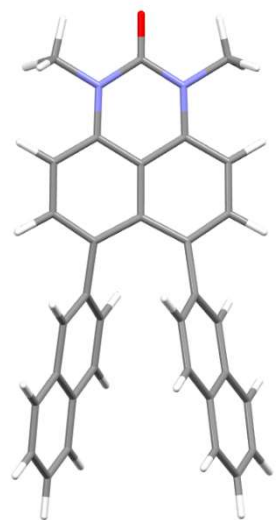**5**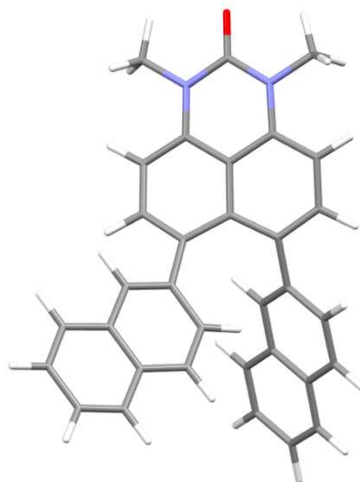**6**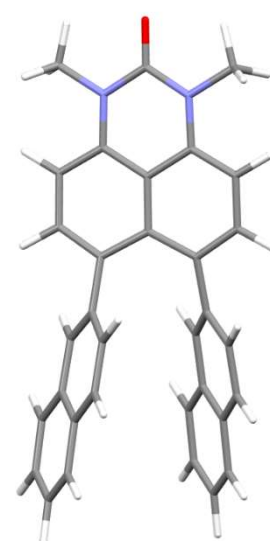**7**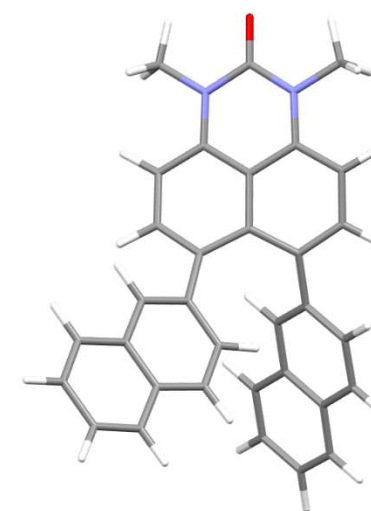**8**

**Table S7.** Dependence of the rotamer energy on dihedral angle C(28)-C(27)-C(24)-C(5) for compound **3h**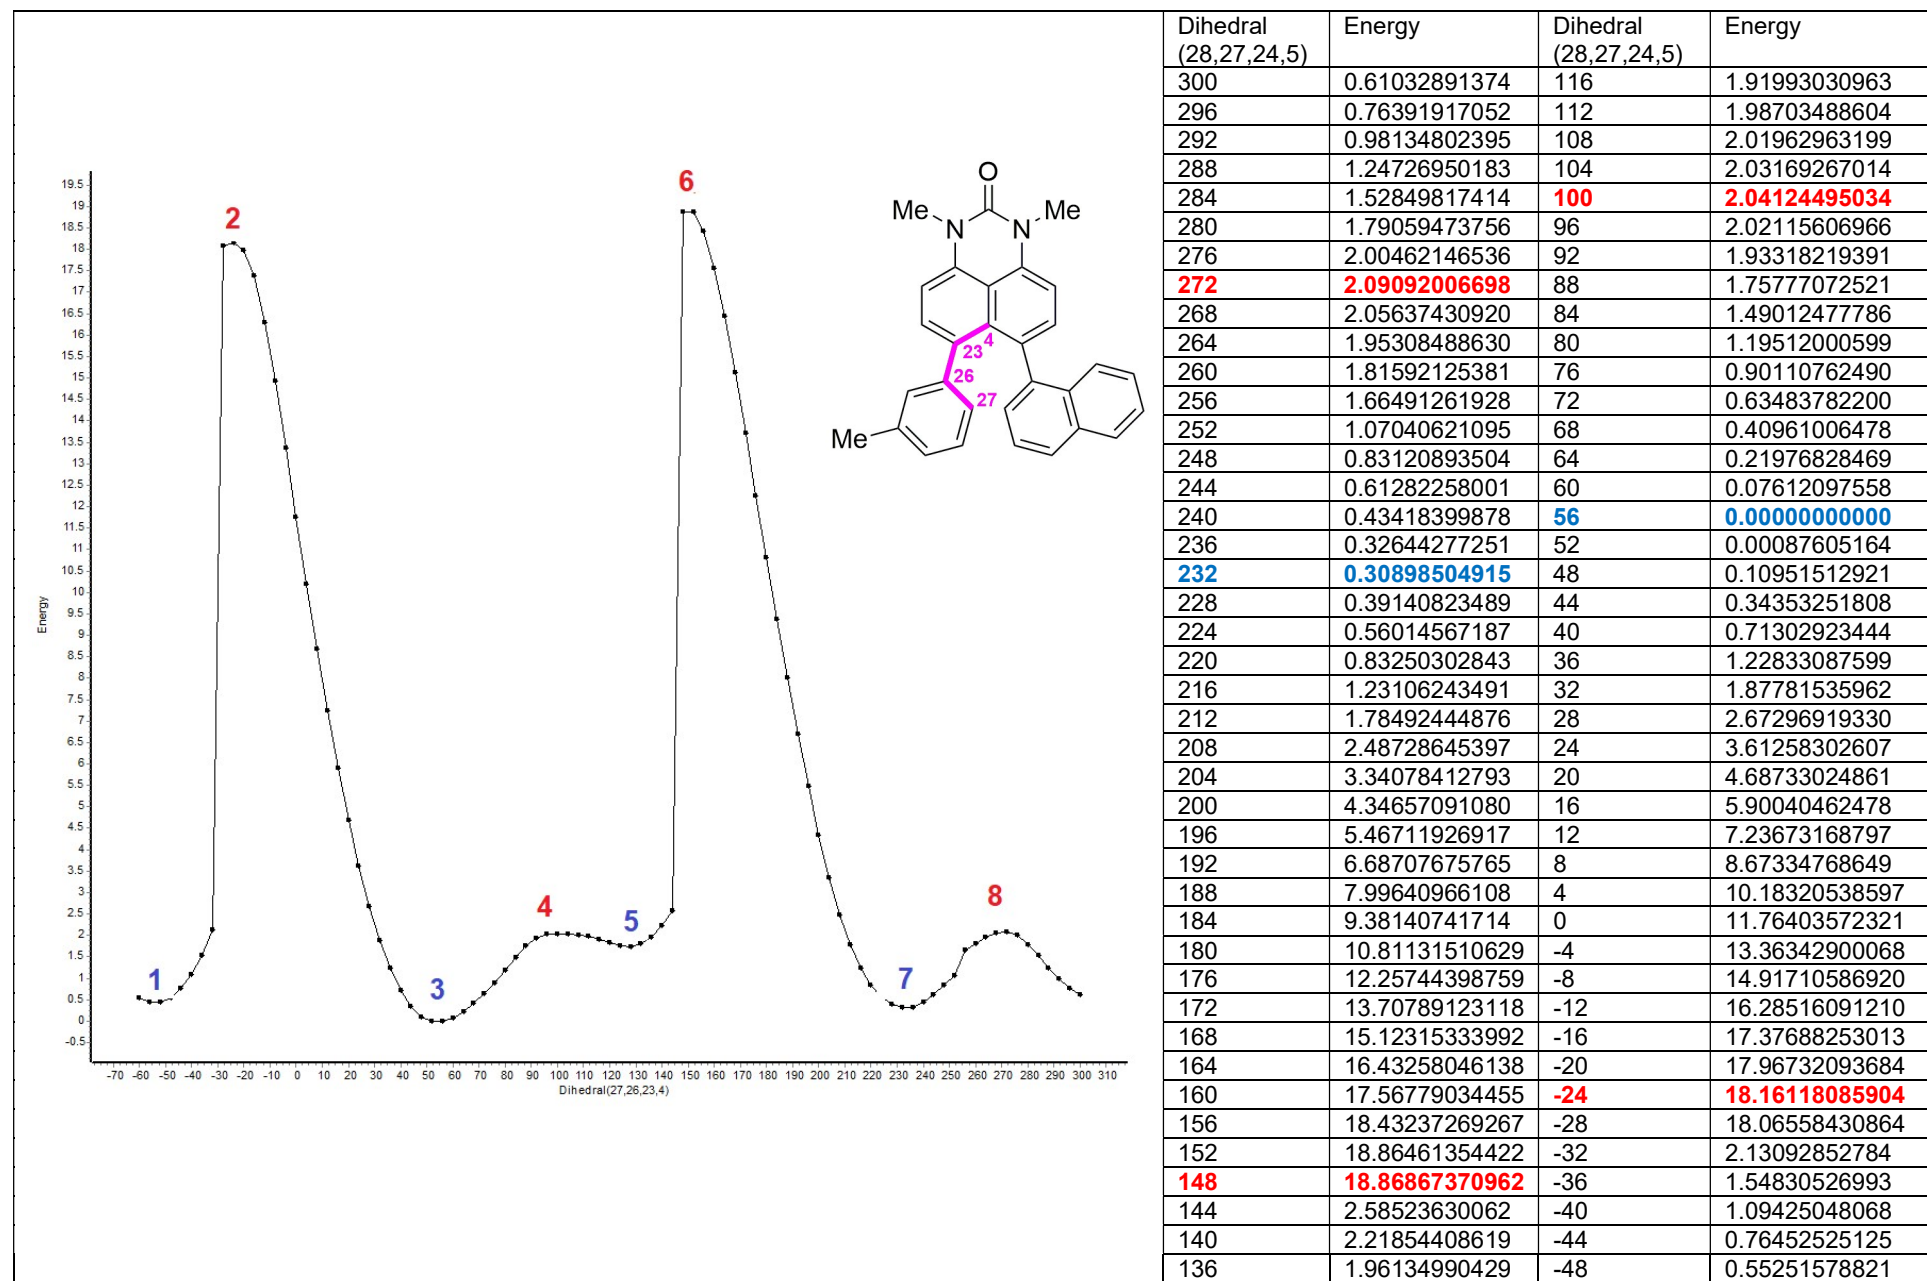

|            |                      |            |                      |
|------------|----------------------|------------|----------------------|
| 132        | 1.80701490035        | -52        | 0.44544835277        |
| <b>128</b> | <b>1.74422247268</b> | <b>-56</b> | <b>0.43982809968</b> |
| 124        | 1.76125839112        | -60        | 0.53795333909        |
| 120        | 1.84170675801        |            |                      |

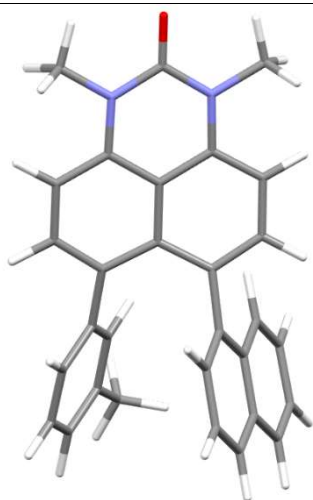**1**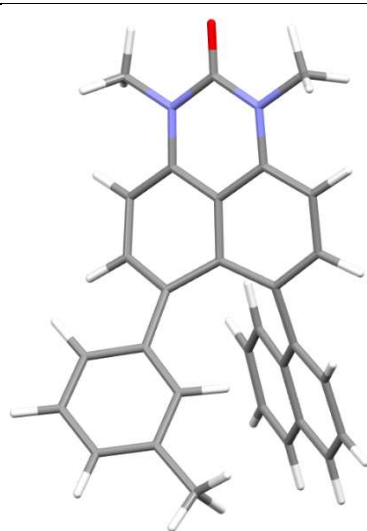**2**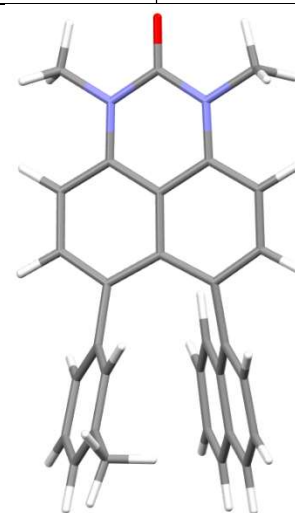**3**Minimum *anti*-conformer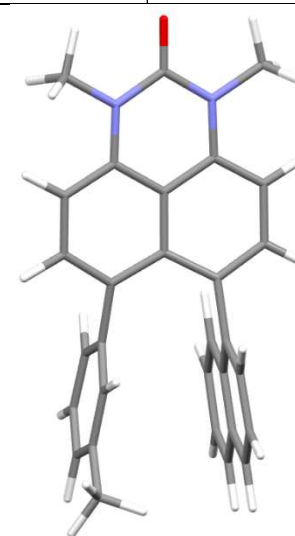**4**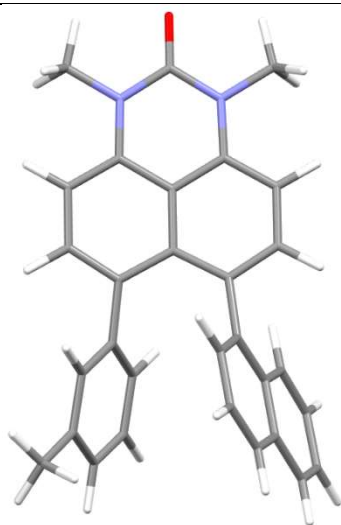**5**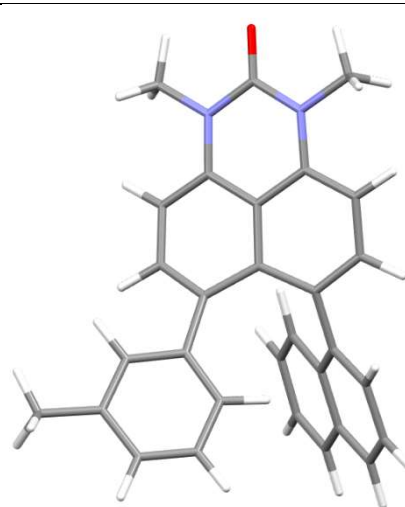**6**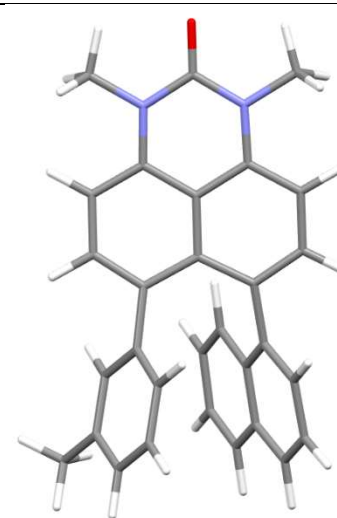**7**Minimum *syn*-conformer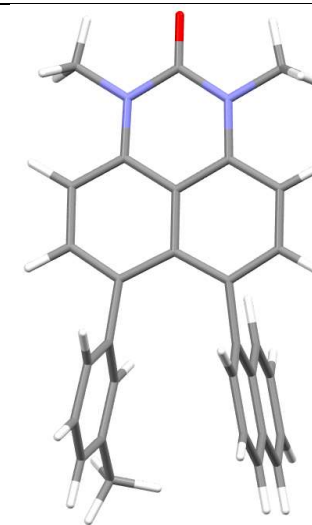**8**



**Table S8.** Dependence of the rotamer energy on dihedral angle C(28)-C(27)-C(24)-C(5) for compound **3d**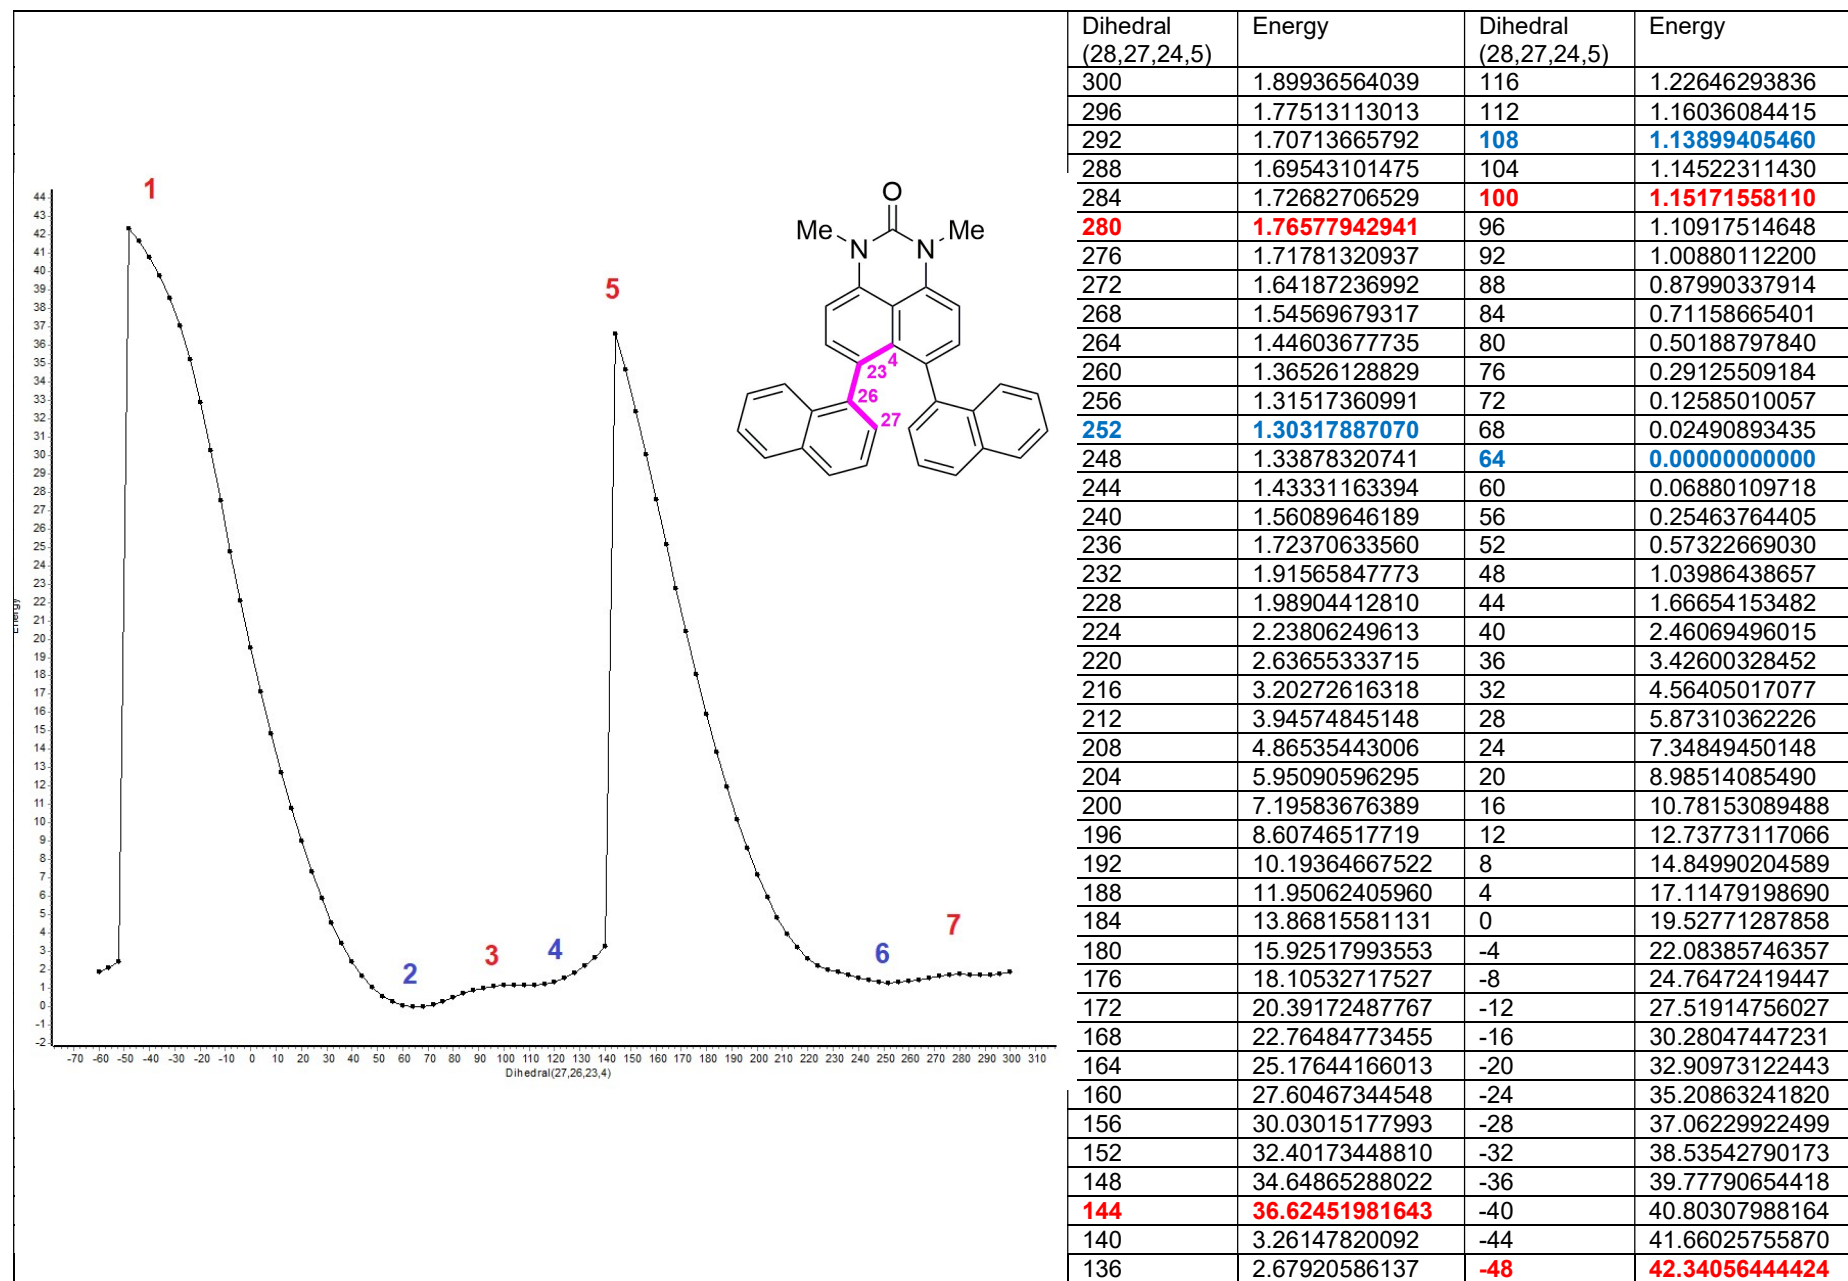

|     |               |     |               |
|-----|---------------|-----|---------------|
| 132 | 2.21502840765 | -52 | 2.43447490551 |
| 128 | 1.85091174319 | -56 | 2.09162728839 |
| 124 | 1.56819704865 | -60 | 1.87032140396 |
| 120 | 1.36014328947 |     |               |

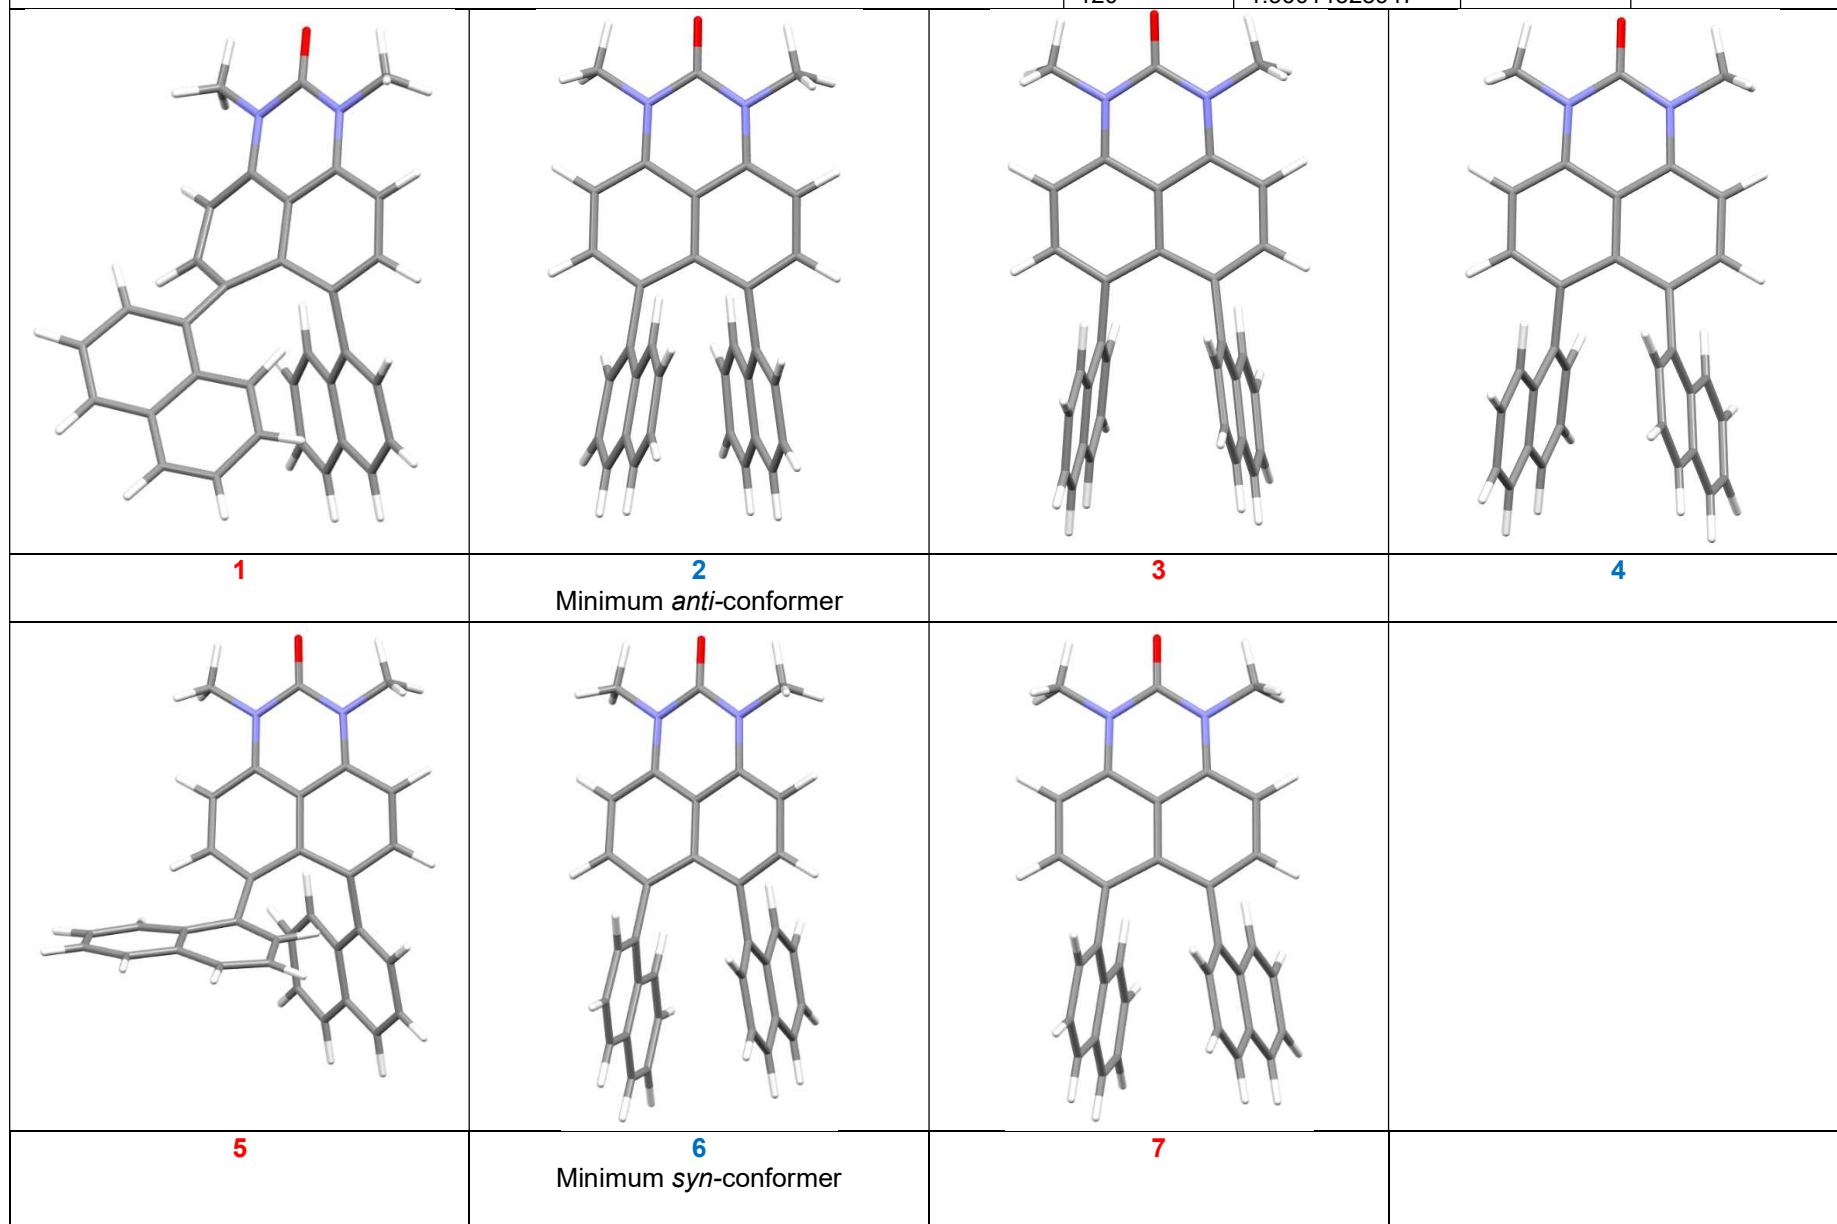

Table S9 Optimized structures and their energies

| Structure of compound                                                             | Absolute energy (a.u.) and atom coordinates                                                                                                                                                                                                                                                                                                                                                                                                                                                                                                                                                                                                                                                                                                                                                                                                                   | Structure of compound                                                               | Absolute energy (a.u.) and atom coordinates                                                                                                                                                                                                                                                                                                                                                                                                                                                                                                                                                                                                                                                                                                                                                                                                                                                                                                                                                                                                                                                                                                                                                                                                                                                                                                                                                                                                                                                                                                                                                    |
|-----------------------------------------------------------------------------------|---------------------------------------------------------------------------------------------------------------------------------------------------------------------------------------------------------------------------------------------------------------------------------------------------------------------------------------------------------------------------------------------------------------------------------------------------------------------------------------------------------------------------------------------------------------------------------------------------------------------------------------------------------------------------------------------------------------------------------------------------------------------------------------------------------------------------------------------------------------|-------------------------------------------------------------------------------------|------------------------------------------------------------------------------------------------------------------------------------------------------------------------------------------------------------------------------------------------------------------------------------------------------------------------------------------------------------------------------------------------------------------------------------------------------------------------------------------------------------------------------------------------------------------------------------------------------------------------------------------------------------------------------------------------------------------------------------------------------------------------------------------------------------------------------------------------------------------------------------------------------------------------------------------------------------------------------------------------------------------------------------------------------------------------------------------------------------------------------------------------------------------------------------------------------------------------------------------------------------------------------------------------------------------------------------------------------------------------------------------------------------------------------------------------------------------------------------------------------------------------------------------------------------------------------------------------|
| <b>Syn-3b</b>                                                                     |                                                                                                                                                                                                                                                                                                                                                                                                                                                                                                                                                                                                                                                                                                                                                                                                                                                               | <b>Anti-3b</b>                                                                      |                                                                                                                                                                                                                                                                                                                                                                                                                                                                                                                                                                                                                                                                                                                                                                                                                                                                                                                                                                                                                                                                                                                                                                                                                                                                                                                                                                                                                                                                                                                                                                                                |
| 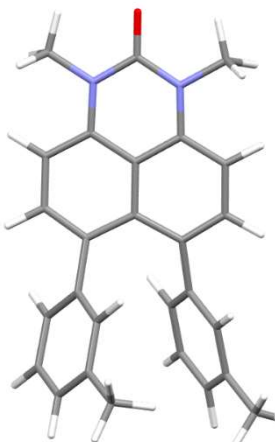 | FINAL SINGLE POINT ENERGY -<br>1225.920236995705<br>C 3.001815000 -1.164566000 -<br>1.399621000<br>N 3.098975000 0.274192000 -<br>1.535502000<br>C 1.953765000 1.045961000 -<br>1.364041000<br>C 2.047095000 2.459996000 -<br>1.492971000<br>C 0.892290000 3.296878000 -<br>1.318855000<br>C 1.092567000 4.720969000 -<br>1.321560000<br>C 0.086324000 5.708291000 -<br>0.861345000<br>C -0.572739000 5.537933000<br>0.361459000<br>C -1.497871000 6.471351000<br>0.838734000<br>C -2.227531000 6.221685000<br>2.125997000<br>C -1.744177000 7.616935000<br>0.072299000<br>C -1.077862000 7.816377000 -<br>1.136412000<br>C -0.170596000 6.869888000 -<br>1.603835000<br>C 2.343076000 5.213282000 -<br>1.658764000<br>C 3.446836000 4.394188000 -<br>1.926413000<br>C 3.318229000 3.020207000 -<br>1.800693000<br>N 4.408947000 2.172528000 -<br>1.967024000 |  | FINAL SINGLE POINT ENERGY -<br>1225.921016501542<br>C 2.984057000 -0.866105000 -2.931318000<br>N 3.075696000 0.477236000 -2.397394000<br>C 1.905752000 1.145343000 -2.048972000<br>C 1.991587000 2.468365000 -1.531636000<br>C 0.809297000 3.197930000 -1.162003000<br>C 0.968927000 4.574866000 -0.778231000<br>C -0.146730000 5.539795000 -0.616565000<br>C -1.090025000 5.722301000 -1.633994000<br>C -2.127820000 6.652114000 -1.518506000<br>C -3.161634000 6.771554000 -2.599463000<br>C -2.195923000 7.434819000 -0.358937000<br>C -1.248275000 7.286343000 0.652792000<br>C -0.230428000 6.344437000 0.528493000<br>C 2.250657000 5.080133000 -0.633405000<br>C 3.406479000 4.338736000 -0.906764000<br>C 3.284155000 3.047130000 -1.393115000<br>N 4.402547000 2.300639000 -1.751382000<br>C 5.717194000 2.890008000 -1.600961000<br>C 4.338951000 1.016030000 -2.253629000<br>O 5.343127000 0.392332000 -2.555046000<br>C -0.446181000 2.497476000 -1.204906000<br>C -1.709359000 2.997400000 -0.608796000<br>C -1.749790000 3.433243000 0.720477000<br>C -2.934870000 3.876856000 1.315002000<br>C -2.925292000 4.409317000 2.717513000<br>C -4.111989000 3.850792000 0.555978000<br>C -4.095854000 3.392915000 -0.760595000<br>C -2.903411000 2.970547000 -1.342802000<br>C -0.477738000 1.223434000 -1.747884000<br>C 0.664471000 0.547208000 -2.193986000<br>H 2.506866000 -1.540280000 -2.203839000<br>H 3.998170000 -1.215930000 -3.141537000<br>H 2.393973000 -0.872932000 -3.860417000<br>H -1.017729000 5.113273000 -2.539221000<br>H -3.722162000 7.714025000 -2.522491000 |

|   |              |              |   |   |              |              |              |
|---|--------------|--------------|---|---|--------------|--------------|--------------|
| C | 5.700578000  | 2.744615000  | - | H | -2.707619000 | 6.715748000  | -3.600196000 |
|   | 2.286789000  |              |   | H | -3.886344000 | 5.942628000  | -2.526593000 |
| C | 4.339735000  | 0.799276000  | - | H | -2.999722000 | 8.168627000  | -0.251623000 |
|   | 1.838838000  |              |   | H | -1.309363000 | 7.905232000  | 1.551874000  |
| O | 5.321011000  | 0.089670000  | - | H | 0.496557000  | 6.212618000  | 1.333866000  |
|   | 1.986168000  |              |   | H | 2.365941000  | 6.125722000  | -0.337820000 |
| C | -0.381218000 | 2.649754000  | - | H | 4.380814000  | 4.806277000  | -0.780989000 |
|   | 1.157067000  |              |   | H | 6.456518000  | 2.155242000  | -1.930667000 |
| C | -1.691847000 | 3.336636000  | - | H | 5.804970000  | 3.799726000  | -2.214363000 |
|   | 1.266295000  |              |   | H | 5.904752000  | 3.153029000  | -0.548829000 |
| C | -2.682898000 | 3.135038000  | - | H | -0.826217000 | 3.435471000  | 1.305506000  |
|   | 0.295114000  |              |   | H | -2.570312000 | 5.454082000  | 2.722744000  |
| C | -3.948993000 | 3.717019000  | - | H | -3.928953000 | 4.395283000  | 3.165763000  |
|   | 0.398277000  |              |   | H | -2.245265000 | 3.834154000  | 3.363367000  |
| C | -4.990373000 | 3.499333000  |   | H | -5.049536000 | 4.191366000  | 1.004483000  |
|   | 0.661725000  |              |   | H | -5.021272000 | 3.374047000  | -1.342251000 |
| C | -4.223014000 | 4.515635000  | - | H | -2.888559000 | 2.636565000  | -2.383332000 |
|   | 1.516639000  |              |   | H | -1.435176000 | 0.698129000  | -1.781825000 |
| C | -3.255268000 | 4.712518000  | - | H | 0.563584000  | -0.457904000 | -2.598143000 |
|   | 2.499636000  |              |   |   |              |              |              |
| C | -1.996950000 | 4.127230000  | - |   |              |              |              |
|   | 2.380435000  |              |   |   |              |              |              |
| C | -0.412172000 | 1.273353000  | - |   |              |              |              |
|   | 1.002836000  |              |   |   |              |              |              |
| C | 0.729604000  | 0.465298000  | - |   |              |              |              |
|   | 1.073872000  |              |   |   |              |              |              |
| H | 2.658351000  | -1.435053000 | - |   |              |              |              |
|   | 0.389466000  |              |   |   |              |              |              |
| H | 3.994574000  | -1.588329000 | - |   |              |              |              |
|   | 1.572902000  |              |   |   |              |              |              |
| H | 2.294274000  | -1.575165000 | - |   |              |              |              |
|   | 2.136058000  |              |   |   |              |              |              |
| H | -0.361393000 | 4.645883000  |   |   |              |              |              |
|   | 0.957161000  |              |   |   |              |              |              |
| H | -2.733130000 | 7.128069000  |   |   |              |              |              |
|   | 2.487912000  |              |   |   |              |              |              |
| H | -2.994418000 | 5.440792000  |   |   |              |              |              |
|   | 1.988253000  |              |   |   |              |              |              |
| H | -1.545485000 | 5.866723000  |   |   |              |              |              |
|   | 2.913352000  |              |   |   |              |              |              |
| H | -2.463837000 | 8.359228000  |   |   |              |              |              |
|   | 0.428820000  |              |   |   |              |              |              |

|               |                                             |                |  |
|---------------|---------------------------------------------|----------------|--|
|               | H -1.276904000 8.714942000 -<br>1.726305000 |                |  |
|               | H 0.328693000 7.017494000 -<br>2.564753000  |                |  |
|               | H 2.491791000 6.295716000 -<br>1.661802000  |                |  |
|               | H 4.402228000 4.853049000 -<br>2.172339000  |                |  |
|               | H 6.421046000 1.926553000 -<br>2.369851000  |                |  |
|               | H 5.655631000 3.291593000 -<br>3.240918000  |                |  |
|               | H 6.022261000 3.438382000 -<br>1.495166000  |                |  |
|               | H -2.447695000 2.526083000<br>0.582760000   |                |  |
|               | H -5.379334000 4.457883000<br>1.039944000   |                |  |
|               | H -5.851659000 2.938674000<br>0.263292000   |                |  |
|               | H -4.584672000 2.934749000<br>1.513072000   |                |  |
|               | H -5.205401000 4.986057000 -<br>1.616872000 |                |  |
|               | H -3.483590000 5.332053000 -<br>3.370852000 |                |  |
|               | H -1.241981000 4.285107000 -<br>3.154093000 |                |  |
|               | H -1.382199000 0.786967000 -<br>0.874529000 |                |  |
|               | H 0.627002000 -0.611528000 -<br>0.956438000 |                |  |
| <b>Syn-3f</b> |                                             | <b>Anti-3f</b> |  |

|                                                                                   |                             |                           |                                                                                     |                             |                                       |  |
|-----------------------------------------------------------------------------------|-----------------------------|---------------------------|-------------------------------------------------------------------------------------|-----------------------------|---------------------------------------|--|
| 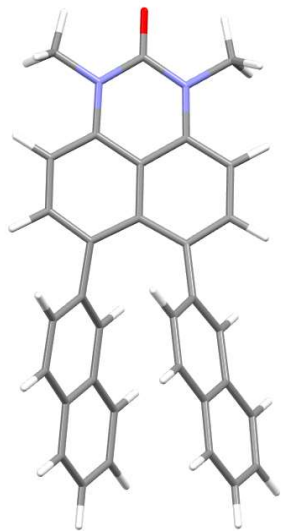 | FINAL SINGLE POINT ENERGY - |                           |  | FINAL SINGLE POINT ENERGY - |                                       |  |
|                                                                                   | 1454.171925940164           |                           |                                                                                     | 1454.171382037626           |                                       |  |
|                                                                                   | O                           | -6.150973000 -4.546179000 |                                                                                     | O                           | -6.266727000 -4.344530000 2.644910000 |  |
|                                                                                   |                             | 2.809433000               |                                                                                     | C                           | -5.448745000 -3.498225000 2.964906000 |  |
|                                                                                   | C                           | -5.403013000 -3.634164000 |                                                                                     | N                           | -5.820080000 -2.201999000 3.262018000 |  |
|                                                                                   |                             | 3.119922000               |                                                                                     | C                           | -7.231194000 -1.882978000 3.189371000 |  |
|                                                                                   | N                           | -5.694113000 -2.318670000 |                                                                                     | C                           | -4.919259000 -1.200651000 3.610325000 |  |
|                                                                                   |                             | 2.819059000               |                                                                                     | C                           | -3.533945000 -1.514534000 3.700160000 |  |
|                                                                                   | C                           | -6.928937000 -2.058799000 |                                                                                     | C                           | -2.568198000 -0.513405000 4.065910000 |  |
|                                                                                   |                             | 2.107488000               |                                                                                     | C                           | -1.208480000 -0.941821000 4.258158000 |  |
|                                                                                   | C                           | -4.871928000 -1.248174000 |                                                                                     | C                           | -0.135045000 -0.092109000 4.829821000 |  |
|                                                                                   |                             | 3.156111000               |                                                                                     | C                           | -0.267656000 0.500173000 6.069927000  |  |
|                                                                                   | C                           | -3.652162000 -1.498185000 |                                                                                     | C                           | 0.736680000 1.349709000 6.593592000   |  |
|                                                                                   |                             | 3.845230000               |                                                                                     | C                           | 0.578657000 2.020806000 7.834839000   |  |
|                                                                                   | C                           | -2.768570000 -0.421504000 |                                                                                     | C                           | 1.545684000 2.883981000 8.295787000   |  |
|                                                                                   |                             | 4.208167000               |                                                                                     | C                           | 2.723460000 3.107568000 7.542015000   |  |
|                                                                                   | C                           | -1.606705000 -0.751367000 |                                                                                     | C                           | 2.912175000 2.459402000 6.342692000   |  |
|                                                                                   |                             | 4.992331000               |                                                                                     | C                           | 1.929364000 1.568699000 5.837783000   |  |
|                                                                                   | C                           | -0.692487000 0.238624000  |                                                                                     | C                           | 2.078180000 0.896378000 4.598152000   |  |
|                                                                                   |                             | 5.614501000               |                                                                                     | C                           | 1.077253000 0.092186000 4.109909000   |  |
|                                                                                   | C                           | 0.670429000 0.160330000   |                                                                                     | C                           | -0.868428000 -2.246978000 3.945258000 |  |
|                                                                                   |                             | 5.401302000               |                                                                                     | C                           | -1.797212000 -3.200849000 3.511920000 |  |
|                                                                                   | C                           | 1.568708000 1.096974000   |                                                                                     | C                           | -3.134834000 -2.851401000 3.419034000 |  |
|                                                                                   |                             | 5.970705000               |                                                                                     | N                           | -4.100441000 -3.783520000 3.051346000 |  |
|                                                                                   | C                           | 2.963484000 1.056919000   |                                                                                     | C                           | -3.688313000 -5.138205000 2.746060000 |  |
|                                                                                   |                             | 5.710980000               |                                                                                     | C                           | -3.037687000 0.837860000 4.218507000  |  |
|                                                                                   | C                           | 3.805213000 2.010907000   |                                                                                     | C                           | -2.163142000 2.025634000 4.379815000  |  |
|                                                                                   |                             | 6.236864000               |                                                                                     | C                           | -1.171491000 2.329257000 3.468060000  |  |
|                                                                                   | C                           | 3.289651000 3.046729000   |                                                                                     | C                           | -0.323741000 3.449886000 3.645142000  |  |
|                                                                                   |                             | 7.051358000               |                                                                                     | C                           | 0.735339000 3.740119000 2.744368000   |  |
| C                                                                                 | 1.941802000 3.105165000     | C                         | 1.574014000 4.808326000 2.965267000                                                 |                             |                                       |  |
|                                                                                   | 7.329104000                 | C                         | 1.387598000 5.643784000 4.093414000                                                 |                             |                                       |  |
| C                                                                                 | 1.049954000 2.138061000     | C                         | 0.361729000 5.396097000 4.976626000                                                 |                             |                                       |  |
|                                                                                   | 6.799619000                 | C                         | -0.516628000 4.299347000 4.778222000                                                |                             |                                       |  |
| C                                                                                 | -0.346937000 2.169010000    | C                         | -1.577101000 4.005483000 5.672514000                                                |                             |                                       |  |
|                                                                                   | 7.053450000                 | C                         | -2.373899000 2.904108000 5.478384000                                                |                             |                                       |  |
| C                                                                                 | -1.190292000 1.247996000    | C                         | -4.399364000 1.082002000 4.152643000                                                |                             |                                       |  |
|                                                                                   | 6.484771000                 | C                         | -5.347105000 0.090742000 3.872688000                                                |                             |                                       |  |
| C                                                                                 | -1.333488000 -2.084770000   | H                         | -7.769155000 -2.792911000 2.910540000                                               |                             |                                       |  |
|                                                                                   | 5.249998000                 | H                         | -7.414352000 -1.103675000 2.433800000                                               |                             |                                       |  |
| C                                                                                 | -2.159535000 -3.136244000   | H                         | -7.596326000 -1.524937000 4.163987000                                               |                             |                                       |  |
|                                                                                   | 4.836085000                 | H                         | -1.183059000 0.352484000 6.648576000                                                |                             |                                       |  |



|   |              |              |   |              |              |             |
|---|--------------|--------------|---|--------------|--------------|-------------|
| C | -3.335277000 | -2.849401000 | H | -0.336457000 | 1.853508000  | 8.409030000 |
|   | 4.162599000  |              | H | 1.406817000  | 3.404112000  | 9.246915000 |
| N | -4.218199000 | -3.859001000 | H | 3.482615000  | 3.798429000  | 7.916954000 |
|   | 3.792001000  |              | H | 3.819296000  | 2.628360000  | 5.756071000 |
| C | -3.892406000 | -5.231820000 | H | 2.993221000  | 1.050743000  | 4.020258000 |
|   | 4.120441000  |              | H | 1.189733000  | -0.388489000 | 3.134831000 |
| C | -3.115954000 | 0.900637000  | H | 0.169338000  | -2.560700000 | 4.083270000 |
|   | 3.758284000  |              | H | -1.459469000 | -4.212226000 | 3.295658000 |
| C | -2.235967000 | 2.089383000  | H | -4.579564000 | -5.708083000 | 2.470376000 |
|   | 3.865458000  |              | H | -3.211398000 | -5.604912000 | 3.621615000 |
| C | -0.942926000 | 2.084815000  | H | -2.974716000 | -5.144488000 | 1.908241000 |
|   | 3.379265000  |              | H | -1.005073000 | 1.678446000  | 2.605998000 |
| C | -0.093103000 | 3.207254000  | H | 0.881854000  | 3.087608000  | 1.879531000 |
|   | 3.528603000  |              | H | 2.391596000  | 5.015220000  | 2.270079000 |
| C | 1.260228000  | 3.185514000  | H | 2.062760000  | 6.486813000  | 4.259719000 |
|   | 3.098827000  |              | H | 0.212123000  | 6.036748000  | 5.849920000 |
| C | 2.079139000  | 4.272677000  | H | -1.735037000 | 4.656421000  | 6.536438000 |
|   | 3.298851000  |              | H | -3.165053000 | 2.669499000  | 6.194870000 |
| C | 1.579499000  | 5.438334000  | H | -4.749290000 | 2.109150000  | 4.282105000 |
|   | 3.928382000  |              | H | -6.399982000 | 0.360330000  | 3.823009000 |
| C | 0.269033000  | 5.494051000  |   |              |              |             |
|   | 4.345489000  |              |   |              |              |             |
| C | -0.597813000 | 4.385794000  |   |              |              |             |
|   | 4.160706000  |              |   |              |              |             |
| C | -1.949210000 | 4.397385000  |   |              |              |             |
|   | 4.591166000  |              |   |              |              |             |
| C | -2.740888000 | 3.284206000  |   |              |              |             |
|   | 4.449425000  |              |   |              |              |             |
| C | -4.333063000 | 1.092498000  |   |              |              |             |
|   | 3.124802000  |              |   |              |              |             |
| C | -5.220725000 | 0.052568000  |   |              |              |             |
|   | 2.830205000  |              |   |              |              |             |
| H | -7.422860000 | -3.017188000 |   |              |              |             |
|   | 1.926805000  |              |   |              |              |             |
| H | -6.722687000 | -1.564818000 |   |              |              |             |
|   | 1.145889000  |              |   |              |              |             |
| H | -7.590776000 | -1.412282000 |   |              |              |             |
|   | 2.703570000  |              |   |              |              |             |
| H | 1.070766000  | -0.608018000 |   |              |              |             |
|   | 4.734055000  |              |   |              |              |             |
| H | 3.356764000  | 0.259623000  |   |              |              |             |
|   | 5.074270000  |              |   |              |              |             |

|               |                                                                                                                                                                                                                                                                                                                                                                                                                                                                                                                                                                                                                                                                                                                                                                                                                                                                                    |                |  |
|---------------|------------------------------------------------------------------------------------------------------------------------------------------------------------------------------------------------------------------------------------------------------------------------------------------------------------------------------------------------------------------------------------------------------------------------------------------------------------------------------------------------------------------------------------------------------------------------------------------------------------------------------------------------------------------------------------------------------------------------------------------------------------------------------------------------------------------------------------------------------------------------------------|----------------|--|
|               | H 4.876333000 1.973634000<br>6.022928000<br>H 3.966320000 3.801587000<br>7.459476000<br>H 1.538509000 3.904276000<br>7.957100000<br>H -0.746291000 2.950594000<br>7.705135000<br>H -2.263095000 1.292772000<br>6.684759000<br>H -0.449047000 -2.325428000<br>5.844474000<br>H -1.884623000 -4.158647000<br>5.086587000<br>H -4.703064000 -5.867809000<br>3.755253000<br>H -3.791253000 -5.354124000<br>5.209518000<br>H -2.948004000 -5.530785000<br>3.640603000<br>H -0.545004000 1.187712000<br>2.899455000<br>H 1.645291000 2.280072000<br>2.622584000<br>H 3.122904000 4.238127000<br>2.977040000<br>H 2.240954000 6.294466000<br>4.082657000<br>H -0.121868000 6.391973000<br>4.831982000<br>H -2.345996000 5.300345000<br>5.063115000<br>H -3.768222000 3.295142000<br>4.822201000<br>H -4.594153000 2.101693000<br>2.797026000<br>H -6.151525000 0.277317000<br>2.313875000 |                |  |
| <b>Syn-3h</b> |                                                                                                                                                                                                                                                                                                                                                                                                                                                                                                                                                                                                                                                                                                                                                                                                                                                                                    | <b>Anti-3h</b> |  |

|                                                                                   |                             |                   |              |                                                                                     |                             |                   |              |              |              |
|-----------------------------------------------------------------------------------|-----------------------------|-------------------|--------------|-------------------------------------------------------------------------------------|-----------------------------|-------------------|--------------|--------------|--------------|
| 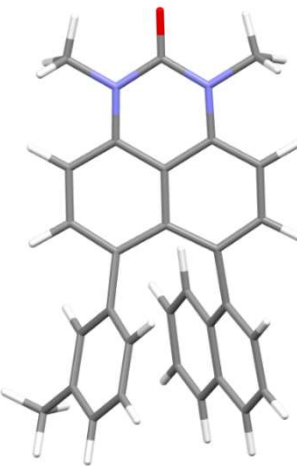 | FINAL SINGLE POINT ENERGY - |                   |              |  | FINAL SINGLE POINT ENERGY - |                   |              |              |              |
|                                                                                   |                             | 1340.046099146739 |              |                                                                                     |                             | 1340.046648311965 |              |              |              |
|                                                                                   | C                           | 4.033638000       | 0.957681000  |                                                                                     | -                           | C                 | 3.948703000  | -0.152274000 | -2.951900000 |
|                                                                                   |                             | 2.928733000       |              |                                                                                     |                             | N                 | 3.787688000  | 0.035105000  | -1.524780000 |
|                                                                                   | N                           | 3.858131000       | 0.629859000  |                                                                                     | -                           | C                 | 2.524232000  | 0.333210000  | -1.022797000 |
|                                                                                   |                             | 1.528803000       |              |                                                                                     |                             | C                 | 2.361473000  | 0.519209000  | 0.378628000  |
|                                                                                   | C                           | 2.654565000       | 0.950254000  |                                                                                     | -                           | C                 | 1.075820000  | 0.831774000  | 0.939979000  |
|                                                                                   |                             | 0.907747000       |              |                                                                                     |                             | C                 | 0.969230000  | 0.877861000  | 2.373711000  |
|                                                                                   | C                           | 2.476962000       | 0.628976000  |                                                                                     | -                           | C                 | -0.306229000 | 0.997618000  | 3.125276000  |
|                                                                                   |                             | 0.467281000       |              |                                                                                     |                             | C                 | -0.482942000 | 2.049318000  | 4.006286000  |
|                                                                                   | C                           | 1.251999000       | 0.944562000  |                                                                                     | -                           | C                 | -1.675501000 | 2.203829000  | 4.743650000  |
|                                                                                   |                             | 1.150186000       |              |                                                                                     |                             | C                 | -2.705663000 | 1.307195000  | 4.586813000  |
|                                                                                   | C                           | 1.102397000       | 0.472256000  |                                                                                     | -                           | C                 | -2.556626000 | 0.188431000  | 3.727410000  |
|                                                                                   |                             | 2.500456000       |              |                                                                                     |                             | C                 | -1.331331000 | 0.005169000  | 3.012472000  |
|                                                                                   | C                           | -0.154130000      | 0.541489000  |                                                                                     | -                           | C                 | -1.176772000 | -1.165459000 | 2.224858000  |
|                                                                                   |                             | 3.289504000       |              |                                                                                     |                             | C                 | -2.193935000 | -2.085790000 | 2.112905000  |
|                                                                                   | C                           | -0.156951000      | 1.195711000  |                                                                                     | -                           | C                 | -3.421871000 | -1.879355000 | 2.781975000  |
|                                                                                   |                             | 4.508365000       |              |                                                                                     |                             | C                 | -3.593737000 | -0.769243000 | 3.576302000  |
|                                                                                   | C                           | -1.322399000      | 1.283199000  |                                                                                     | -                           | C                 | 2.120747000  | 0.751551000  | 3.132257000  |
|                                                                                   |                             | 5.297888000       |              |                                                                                     |                             | C                 | 3.387605000  | 0.527887000  | 2.578559000  |
|                                                                                   | C                           | -2.496886000      | 0.717435000  |                                                                                     | -                           | C                 | 3.510765000  | 0.379520000  | 1.206841000  |
|                                                                                   |                             | 4.861664000       |              |                                                                                     |                             | N                 | 4.738461000  | 0.092114000  | 0.618801000  |
|                                                                                   | C                           | -2.535414000      | 0.000301000  |                                                                                     | -                           | C                 | 4.915891000  | -0.089324000 | -0.738801000 |
|                                                                                   |                             | 3.638080000       |              |                                                                                     |                             | O                 | 6.008970000  | -0.345677000 | -1.216105000 |
|                                                                                   | C                           | -1.345200000      | -0.122222000 |                                                                                     | -                           | C                 | 5.909114000  | -0.031330000 | 1.462979000  |
|                                                                                   |                             | 2.853971000       |              |                                                                                     |                             | C                 | -0.014833000 | 1.053815000  | 0.030510000  |
|                                                                                   | C                           | -1.391584000      | -0.909586000 |                                                                                     | -                           | C                 | 0.189005000  | 0.822445000  | -1.319555000 |
|                                                                                   |                             | 1.674121000       |              |                                                                                     |                             | C                 | 1.426215000  | 0.449648000  | -1.859489000 |
|                                                                                   | C                           | -2.562555000      | -1.503699000 |                                                                                     | -                           | C                 | -1.342734000 | 1.594011000  | 0.417105000  |
|                                                                                   |                             | 1.262075000       |              |                                                                                     |                             | C                 | -1.451118000 | 2.823360000  | 1.075095000  |
|                                                                                   | C                           | -3.749308000      | -1.343842000 |                                                                                     | -                           | C                 | -2.693405000 | 3.373741000  | 1.409799000  |
|                                                                                   |                             | 2.013625000       |              |                                                                                     |                             | C                 | -2.766254000 | 4.672345000  | 2.158053000  |
|                                                                                   | C                           | -3.730589000      | -0.614302000 |                                                                                     | -                           | C                 | -3.850049000 | 2.672206000  | 1.051516000  |
|                                                                                   | 3.180024000                 |                   |              | C                                                                                   | -3.761322000                | 1.457149000       | 0.372489000  |              |              |
| C                                                                                 | 2.180994000                 | -0.140625000      | -            | C                                                                                   | -2.517609000                | 0.920560000       | 0.053934000  |              |              |
|                                                                                   | 3.115691000                 |                   |              | H                                                                                   | 5.001899000                 | -0.369888000      | -3.147645000 |              |              |
| C                                                                                 | 3.403656000                 | -0.374080000      | -            | H                                                                                   | 3.329675000                 | -0.991410000      | -3.304180000 |              |              |
|                                                                                   | 2.474137000                 |                   |              | H                                                                                   | 3.654300000                 | 0.757957000       | -3.496196000 |              |              |
| C                                                                                 | 3.548317000                 | -0.021054000      | -            | H                                                                                   | 0.306469000                 | 2.799449000       | 4.099313000  |              |              |
|                                                                                   | 1.142580000                 |                   |              | H                                                                                   | -1.782550000                | 3.054565000       | 5.421196000  |              |              |
| N                                                                                 | 4.722089000                 | -0.293123000      | -            | H                                                                                   | -3.646301000                | 1.433354000       | 5.129374000  |              |              |
|                                                                                   | 0.446839000                 |                   |              | H                                                                                   | -0.233568000                | -1.330471000      | 1.701232000  |              |              |

|   |              |              |   |   |              |              |              |
|---|--------------|--------------|---|---|--------------|--------------|--------------|
| C | 4.913121000  | 0.013899000  | - | H | -2.053310000 | -2.980871000 | 1.501926000  |
|   | 0.886065000  |              |   | H | -4.227873000 | -2.609907000 | 2.676767000  |
| O | 5.955871000  | -0.245693000 | - | H | -4.532536000 | -0.610826000 | 4.114021000  |
|   | 1.463436000  |              |   | H | 2.030220000  | 0.790904000  | 4.220374000  |
| C | 5.815673000  | -0.941332000 |   | H | 4.247302000  | 0.431924000  | 3.238418000  |
|   | 1.141590000  |              |   | H | 6.085903000  | 0.904186000  | 2.014995000  |
| C | 0.257053000  | 1.688977000  |   | H | 5.781141000  | -0.851045000 | 2.186444000  |
|   | 0.427705000  |              |   | H | 6.767887000  | -0.243405000 | 0.820718000  |
| C | 0.464806000  | 1.941571000  | - | H | -0.647222000 | 0.983136000  | -2.004251000 |
|   | 0.917975000  |              |   | H | 1.514268000  | 0.299813000  | -2.933515000 |
| C | 1.629578000  | 1.572061000  | - | H | -0.538940000 | 3.366705000  | 1.336139000  |
|   | 1.601810000  |              |   | H | -3.786577000 | 5.081171000  | 2.162836000  |
| C | -0.960238000 | 2.290743000  |   | H | -2.092299000 | 5.426356000  | 1.723400000  |
|   | 1.029838000  |              |   | H | -2.456006000 | 4.528664000  | 3.206633000  |
| C | -2.220705000 | 2.029977000  |   | H | -4.830025000 | 3.085282000  | 1.307184000  |
|   | 0.479601000  |              |   | H | -4.671853000 | 0.919131000  | 0.096343000  |
| C | -3.383536000 | 2.628295000  |   | H | -2.448775000 | -0.042335000 | -0.457034000 |
|   | 0.976807000  |              |   |   |              |              |              |
| C | -4.725059000 | 2.282680000  |   |   |              |              |              |
|   | 0.396786000  |              |   |   |              |              |              |
| C | -3.262119000 | 3.527527000  |   |   |              |              |              |
|   | 2.041749000  |              |   |   |              |              |              |
| C | -2.011598000 | 3.813956000  |   |   |              |              |              |
|   | 2.589794000  |              |   |   |              |              |              |
| C | -0.866279000 | 3.201982000  |   |   |              |              |              |
|   | 2.090227000  |              |   |   |              |              |              |
| H | 5.035303000  | 0.638204000  | - |   |              |              |              |
|   | 3.228284000  |              |   |   |              |              |              |
| H | 3.283855000  | 0.437665000  | - |   |              |              |              |
|   | 3.544275000  |              |   |   |              |              |              |
| H | 3.932005000  | 2.042103000  | - |   |              |              |              |
|   | 3.087008000  |              |   |   |              |              |              |
| H | 0.757292000  | 1.691428000  |   |   |              |              |              |
|   | 4.844250000  |              |   |   |              |              |              |
| H | -1.289796000 | 1.824019000  |   |   |              |              |              |
|   | 6.246877000  |              |   |   |              |              |              |
| H | -3.413171000 | 0.802688000  |   |   |              |              |              |
|   | 5.451865000  |              |   |   |              |              |              |
| H | -0.480817000 | -1.037439000 |   |   |              |              |              |
|   | 1.086555000  |              |   |   |              |              |              |
| H | -2.575997000 | -2.104196000 |   |   |              |              |              |
|   | 0.349096000  |              |   |   |              |              |              |

|               |                                                                                                                                                                                                                                                                                                                                                                                                                                                                                                                                                                                                                                                                                                                                                      |                |  |
|---------------|------------------------------------------------------------------------------------------------------------------------------------------------------------------------------------------------------------------------------------------------------------------------------------------------------------------------------------------------------------------------------------------------------------------------------------------------------------------------------------------------------------------------------------------------------------------------------------------------------------------------------------------------------------------------------------------------------------------------------------------------------|----------------|--|
|               | H -4.676144000 -1.812146000<br>1.673028000<br>H -4.638222000 -0.501332000<br>3.779237000<br>H 2.058864000 -0.493158000<br>4.142593000<br>H 4.205015000 -0.867014000<br>3.020391000<br>H 6.146506000 -0.329939000<br>1.994800000<br>H 5.507032000 -1.930470000<br>1.513145000<br>H 6.641802000 -1.059653000<br>0.435499000<br>H -0.300599000 2.498435000 -<br>1.463727000<br>H 1.727041000 1.818130000 -<br>2.657168000<br>H -2.298447000 1.317696000 -<br>0.346309000<br>H -5.058189000 1.292228000<br>0.748947000<br>H -4.688722000 2.238630000 -<br>0.702308000<br>H -5.491006000 3.015165000<br>0.688899000<br>H -4.157394000 4.009371000<br>2.444983000<br>H -1.929496000 4.525370000<br>3.415541000<br>H 0.112204000 3.433438000<br>2.516624000 |                |  |
| <b>Syn-3d</b> |                                                                                                                                                                                                                                                                                                                                                                                                                                                                                                                                                                                                                                                                                                                                                      | <b>Anti-3d</b> |  |

|                                                                                   |                             |                          |                                                                                     |                             |                                      |  |
|-----------------------------------------------------------------------------------|-----------------------------|--------------------------|-------------------------------------------------------------------------------------|-----------------------------|--------------------------------------|--|
| 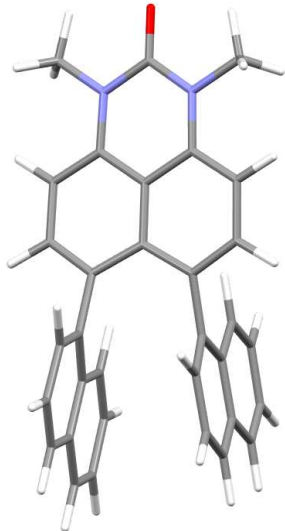 | FINAL SINGLE POINT ENERGY - |                          |  | FINAL SINGLE POINT ENERGY - |                                      |  |
|                                                                                   | 1454.170269881807           |                          |                                                                                     | 1454.172392151713           |                                      |  |
|                                                                                   | C                           | 5.741864000 3.074836000  |                                                                                     | C                           | 3.796337000 0.961717000 1.767506000  |  |
|                                                                                   | 3.029954000                 |                          |                                                                                     | N                           | 3.429055000 1.455753000 3.078737000  |  |
|                                                                                   | N                           | 4.528848000 2.628302000  |                                                                                     | C                           | 2.402476000 2.389142000 3.183941000  |  |
|                                                                                   | 3.683369000                 |                          |                                                                                     | C                           | 2.030471000 2.866671000 4.472336000  |  |
|                                                                                   | C                           | 3.564356000 3.569766000  |                                                                                     | C                           | 0.971843000 3.824964000 4.629775000  |  |
|                                                                                   | 4.029489000                 |                          |                                                                                     | C                           | 0.584752000 4.179464000 5.967902000  |  |
|                                                                                   | C                           | 2.375554000 3.126263000  |                                                                                     | C                           | -0.590832000 5.018103000 6.320869000 |  |
|                                                                                   | 4.673431000                 |                          |                                                                                     | C                           | -0.401562000 6.199441000 7.014662000 |  |
|                                                                                   | C                           | 1.356608000 4.058795000  |                                                                                     | C                           | -1.486906000 7.018501000 7.389167000 |  |
|                                                                                   | 5.051687000                 |                          |                                                                                     | C                           | -2.772192000 6.651963000 7.067468000 |  |
|                                                                                   | C                           | 0.242596000 3.570132000  |                                                                                     | C                           | -3.021506000 5.428664000 6.394971000 |  |
|                                                                                   | 5.807776000                 |                          |                                                                                     | C                           | -1.924171000 4.582121000 6.040030000 |  |
|                                                                                   | C                           | -0.691262000 4.476274000 |                                                                                     | C                           | -2.204541000 3.330280000 5.432099000 |  |
|                                                                                   | 6.533084000                 |                          |                                                                                     | C                           | -3.496575000 2.952912000 5.147430000 |  |
|                                                                                   | C                           | -0.249874000 5.070311000 |                                                                                     | C                           | -4.578182000 3.809435000 5.459826000 |  |
|                                                                                   | 7.700930000                 |                          |                                                                                     | C                           | -4.342589000 5.015883000 6.076858000 |  |
|                                                                                   | C                           | -1.081935000 5.929213000 |                                                                                     | C                           | 1.321497000 3.679778000 7.028049000  |  |
|                                                                                   | 8.448320000                 |                          |                                                                                     | C                           | 2.400023000 2.800243000 6.870245000  |  |
|                                                                                   | C                           | -2.361938000 6.195697000 |                                                                                     | C                           | 2.740878000 2.366438000 5.599758000  |  |
|                                                                                   | 8.021023000                 |                          |                                                                                     | N                           | 3.768208000 1.449633000 5.400248000  |  |
|                                                                                   | C                           | -2.865622000 5.593035000 |                                                                                     | C                           | 4.138787000 0.970206000 4.159349000  |  |
|                                                                                   | 6.840862000                 |                          |                                                                                     | O                           | 5.042618000 0.162049000 4.025447000  |  |
|                                                                                   | C                           | -2.030169000 4.704444000 |                                                                                     | C                           | 4.498693000 0.953902000 6.548733000  |  |
|                                                                                   | 6.092795000                 |                          |                                                                                     | C                           | 0.375828000 4.363150000 3.437693000  |  |
|                                                                                   | C                           | -2.556865000 4.098190000 |                                                                                     | C                           | 0.756300000 3.846641000 2.211193000  |  |
|                                                                                   | 4.922867000                 |                          |                                                                                     | C                           | 1.739223000 2.859455000 2.062506000  |  |
|                                                                                   | C                           | -3.838736000 4.365950000 |                                                                                     | C                           | -0.595699000 5.487196000 3.412018000 |  |
|                                                                                   | 4.502634000                 |                          |                                                                                     | C                           | -0.217316000 6.797976000 3.842645000 |  |
| C                                                                                 | -4.660640000 5.253625000    | C                        | 1.097963000 7.106028000 4.279326000                                                 |                             |                                      |  |
| 5.235277000                                                                       |                             | C                        | 1.423628000 8.369825000 4.714527000                                                 |                             |                                      |  |
| C                                                                                 | -4.183575000 5.851208000    | C                        | 0.447466000 9.393411000 4.734717000                                                 |                             |                                      |  |
| 6.378645000                                                                       |                             | C                        | -0.828404000 9.134920000 4.290530000                                                |                             |                                      |  |
| C                                                                                 | 0.122097000 2.208763000     | C                        | -1.191978000 7.844798000 3.821399000                                                |                             |                                      |  |
| 6.015896000                                                                       |                             | C                        | -2.491857000 7.579500000 3.320127000                                                |                             |                                      |  |
| C                                                                                 | 1.074309000 1.281780000     | C                        | -2.811079000 6.330500000 2.842492000                                                |                             |                                      |  |
| 5.565107000                                                                       |                             | C                        | -1.860750000 5.289451000 2.889495000                                                |                             |                                      |  |
| C                                                                                 | 2.219890000 1.736339000     | H                        | 4.142644000 1.786062000 1.125443000                                                 |                             |                                      |  |
| 4.929975000                                                                       |                             | H                        | 4.603339000 0.235141000 1.893612000                                                 |                             |                                      |  |
| N                                                                                 | 3.228166000 0.864289000     | H                        | 2.935646000 0.474480000 1.284888000                                                 |                             |                                      |  |
| 4.531320000                                                                       |                             | H                        | 0.616958000 6.522782000 7.239027000                                                 |                             |                                      |  |



|   |              |              |   |              |              |             |
|---|--------------|--------------|---|--------------|--------------|-------------|
| C | 4.392078000  | 1.271786000  | H | -1.295052000 | 7.955968000  | 7.916495000 |
|   | 3.908083000  |              | H | -3.619587000 | 7.290450000  | 7.330861000 |
| O | 5.253475000  | 0.475421000  | H | -1.374904000 | 2.665227000  | 5.184877000 |
|   | 3.573958000  |              | H | -3.690078000 | 1.985725000  | 4.676748000 |
| C | 3.069363000  | -0.553412000 | H | -5.600053000 | 3.503661000  | 5.221799000 |
|   | 4.781450000  |              | H | -5.173073000 | 5.676815000  | 6.339867000 |
| C | 1.505633000  | 5.424735000  | H | 1.024779000  | 3.959937000  | 8.041582000 |
|   | 4.640002000  |              | H | 2.928454000  | 2.443748000  | 7.751887000 |
| C | 2.688478000  | 5.813844000  | H | 3.821924000  | 0.430281000  | 7.241193000 |
|   | 4.041334000  |              | H | 4.982393000  | 1.783985000  | 7.085616000 |
| C | 3.733107000  | 4.918364000  | H | 5.261185000  | 0.257759000  | 6.189548000 |
|   | 3.759240000  |              | H | 0.291795000  | 4.256287000  | 1.311081000 |
| C | 0.380638000  | 6.400940000  | H | 1.992820000  | 2.507308000  | 1.064776000 |
|   | 4.648609000  |              | H | 1.855687000  | 6.320137000  | 4.269567000 |
| C | -0.602414000 | 6.315329000  | H | 2.442229000  | 8.586059000  | 5.046435000 |
|   | 3.610567000  |              | H | 0.714133000  | 10.391616000 | 5.090915000 |
| C | -0.545321000 | 5.329613000  | H | -1.584609000 | 9.924747000  | 4.283848000 |
|   | 2.589010000  |              | H | -3.228534000 | 8.387266000  | 3.312179000 |
| C | -1.504924000 | 5.270501000  | H | -3.808581000 | 6.129466000  | 2.444605000 |
|   | 1.604248000  |              | H | -2.141147000 | 4.291014000  | 2.547667000 |
| C | -2.577401000 | 6.191081000  |   |              |              |             |
|   | 1.594799000  |              |   |              |              |             |
| C | -2.658276000 | 7.162303000  |   |              |              |             |
|   | 2.565739000  |              |   |              |              |             |
| C | -1.676629000 | 7.259394000  |   |              |              |             |
|   | 3.586446000  |              |   |              |              |             |
| C | -1.732220000 | 8.273829000  |   |              |              |             |
|   | 4.575509000  |              |   |              |              |             |
| C | -0.753843000 | 8.362026000  |   |              |              |             |
|   | 5.537631000  |              |   |              |              |             |
| C | 0.303665000  | 7.427367000  |   |              |              |             |
|   | 5.567902000  |              |   |              |              |             |
| H | 6.285777000  | 3.785513000  |   |              |              |             |
|   | 3.670589000  |              |   |              |              |             |
| H | 6.368217000  | 2.198436000  |   |              |              |             |
|   | 2.843990000  |              |   |              |              |             |
| H | 5.507175000  | 3.567978000  |   |              |              |             |
|   | 2.074105000  |              |   |              |              |             |
| H | 0.773008000  | 4.882341000  |   |              |              |             |
|   | 8.037102000  |              |   |              |              |             |
| H | -0.699712000 | 6.387873000  |   |              |              |             |
|   | 9.363681000  |              |   |              |              |             |

|   |              |              |  |  |
|---|--------------|--------------|--|--|
| H | -3.010394000 | 6.871594000  |  |  |
|   | 8.584981000  |              |  |  |
| H | -1.919154000 | 3.422267000  |  |  |
|   | 4.351153000  |              |  |  |
| H | -4.222241000 | 3.898213000  |  |  |
|   | 3.592896000  |              |  |  |
| H | -5.675933000 | 5.462995000  |  |  |
|   | 4.889137000  |              |  |  |
| H | -4.814013000 | 6.535682000  |  |  |
|   | 6.952846000  |              |  |  |
| H | -0.732045000 | 1.841250000  |  |  |
|   | 6.590544000  |              |  |  |
| H | 0.921106000  | 0.222890000  |  |  |
|   | 5.763806000  |              |  |  |
| H | 2.173994000  | -0.938044000 |  |  |
|   | 4.269703000  |              |  |  |
| H | 2.971199000  | -0.746599000 |  |  |
|   | 5.860628000  |              |  |  |
| H | 3.955980000  | -1.065722000 |  |  |
|   | 4.398584000  |              |  |  |
| H | 2.796076000  | 6.855437000  |  |  |
|   | 3.728001000  |              |  |  |
| H | 4.637458000  | 5.290453000  |  |  |
|   | 3.281746000  |              |  |  |
| H | 0.278436000  | 4.613193000  |  |  |
|   | 2.591525000  |              |  |  |
| H | -1.440154000 | 4.505682000  |  |  |
|   | 0.826207000  |              |  |  |
| H | -3.338863000 | 6.131198000  |  |  |
|   | 0.813124000  |              |  |  |
| H | -3.481552000 | 7.881875000  |  |  |
|   | 2.564286000  |              |  |  |
| H | -2.561302000 | 8.986133000  |  |  |
|   | 4.554517000  |              |  |  |
| H | -0.794547000 | 9.149291000  |  |  |
|   | 6.294209000  |              |  |  |
| H | 1.060684000  | 7.495771000  |  |  |
|   | 6.352262000  |              |  |  |

**References**

1. L.A. Kurasov, A.F. Pozharskii, V.V. Kuz'menko. *Zh. Org. Khim.* **1981**, *17*, 1944-1947 (in Russian).
2. A.F. Pozharskii, N.V. Vistorobskii, V.S. Grigoryan. *Russ. J. Org. Chem.* **1994**, *30*, 985-991.
3. C. Adamo, V. Barone. *J. Chem. Phys.* **1999**, *110*, 6158-6170.
4. F. Weigend, R. Ahlrichs. *Phys. Chem. Chem. Phys.* **2005**, *7*, 3297-3305.
5. S. Grimme, J. Antony, S. Ehrlich, H. Krieg. *J. Chem. Phys.* **2010**, *132*, 154104.
6. F. Neese. *WIREs Comput. Mol. Sci.* **2012**, *2*, 73-78.
7. B. Mennucci. *WIREs Comput. Mol. Sci.* **2012**, *2*, 386-404.
